# Supplementary material for: Microbial Cysteine Degradation Drives Cryptic Sulfide Redox Chemistry in the Gut
Source: Research Square preprint supplement (doi:10.21203/rs.3.rs-909548/v1), 2021-10-01
Supplement: Supplementary file 3 [file 53f5d6c66c3c8a0c9500ba86.xlsx]

## Sheet: Sup. Table 1
Genome Assembly	Genus	Species	CBS	CSE	CysK	CysM	CyuA	MalY	MetC	SseA	TnaA
GCA_000008925.1	Lactobacillus	salivarius	1	1	1	1	1	1	1	0	0
GCA_000012825.1	Bacteroides	vulgatus	1	0	1	1	1	1	1	0	0
GCA_000164675.2	Streptococcus	parasanguinis	1	1	1	1	0	1	1	0	0
GCA_000195275.1	Treponema	succinifaciens	1	0	1	1	1	1	1	0	0
GCA_000212375.1	Porphyromonas	asaccharolytica	0	0	0	0	1	0	1	0	1
GCA_000224985.1	Lactobacillus	ruminis	1	0	1	1	1	1	1	0	0
GCA_000225345.1	Roseburia	hominis	1	1	1	1	1	1	1	0	0
GCA_000265365.1	Alistipes	finegoldii	1	0	1	1	1	1	1	0	1
GCA_000448685.2	Streptococcus	salivarius	1	1	1	1	1	1	1	0	0
GCA_000478885.1	Adlercreutzia	equolifaciens	1	1	1	1	0	1	1	0	0
GCA_000597845.1	Escherichia	coli	1	0	1	1	1	1	1	1	1
GCA_000695895.1	Bifidobacterium	animalis	1	0	1	1	0	1	1	0	0
GCA_000710365.3	Bacteroides	fragilis	1	1	1	1	1	1	1	0	0
GCA_000737885.1	Bifidobacterium	adolescentis	1	0	1	1	0	1	1	0	0
GCA_000761115.1	Lactococcus	lactis	1	1	1	1	1	1	1	0	0
GCA_000770155.1	Enterobacter	cloacae	1	1	1	1	1	1	1	1	0
GCA_000833105.2	Clostridium	beijerinckii	1	0	1	1	1	1	1	0	0
GCA_000966445.2	Bifidobacterium	angulatum	1	0	1	1	0	1	1	0	0
GCA_001025195.1	Bifidobacterium	catenulatum	1	0	1	1	0	1	1	0	0
GCA_001281345.1	Bifidobacterium	bifidum	1	0	1	1	0	1	1	0	0
GCA_001281425.1	Bifidobacterium	breve	1	1	1	1	0	1	1	0	0
GCA_001298485.1	Enterococcus	faecium	1	0	1	1	1	1	1	0	0
GCA_001314975.1	Bacteroides	thetaiotaomicron	1	1	1	1	1	1	1	0	1
GCA_001314995.1	Bacteroides	ovatus	1	0	1	1	1	1	1	0	1
GCA_001318345.1	Bacteroides	cellulosilyticus	1	0	1	1	1	1	1	0	1
GCA_001446255.1	Bifidobacterium	longum	1	0	1	1	0	1	1	0	0
GCA_001481725.1	Eubacterium	limosum	1	1	1	1	1	1	1	0	0
GCA_001518735.1	Enterococcus	faecium	1	0	1	1	1	1	0	0	0
GCA_001598635.1	Enterococcus	faecalis	1	1	1	1	1	1	1	0	0
GCA_001640865.1	Bacteroides	dorei	1	1	1	1	1	1	1	0	0
GCA_001688765.2	Akkermansia	muciniphila	1	0	1	1	0	1	1	0	1
GCA_001998765.1	Anaerostipes	hadrus	1	1	1	1	1	1	1	0	0
GCA_002222615.2	Bacteroides	caccae	1	1	1	1	1	1	1	0	0
GCA_002586945.1	Faecalibacterium	prausnitzii	1	1	1	1	1	1	1	0	0
GCA_002736145.1	Collinsella	aerofaciens	1	0	1	1	1	1	1	0	0
GCA_002895225.1	Lactococcus	lactis	1	0	1	1	0	1	1	0	0
GCA_003363675.2	Bacteroides	intestinalis	1	0	1	1	1	1	1	0	1
GCA_003711605.1	Enterococcus	faecium	0	0	0	0	1	1	0	0	0
GCA_003952825.1	Bifidobacterium	pseudocatenulatum	1	0	1	1	0	1	1	0	0
GCA_006149185.1	Parabacteroides	distasonis	1	1	1	1	1	1	1	0	0
GCA_006542645.1	Alistipes	onderdonkii	1	0	1	1	1	1	1	0	1
GCA_006546965.1	Bacteroides	xylanisolvens	1	0	1	1	1	1	1	0	1
GCA_006742345.1	Bacteroides	uniformis	1	0	1	1	1	1	1	0	1
GCA_007997855.1	Escherichia	coli	0	0	0	0	1	1	0	1	0
GCA_008121495.1	[Ruminococcus]	gnavus	1	1	1	1	1	1	1	0	0
GCA_009734165.1	Bacteroides	ovatus	1	1	1	1	1	1	1	0	0
GCA_010223015.1	Akkermansia	muciniphila	1	0	1	0	0	1	1	0	1
GCA_013046825.1	Turicibacter	sanguinis	1	1	1	1	1	1	0	0	0
GCA_013267535.1	Finegoldia	magna	0	0	0	0	1	1	0	0	0
GCA_014131755.1	Bacteroides	thetaiotaomicron	1	0	1	0	1	1	1	0	1
GCA_014163495.1	Alistipes	indistinctus	1	0	1	0	0	1	1	0	1
GCA_014334715.1	Lactococcus	lactis	1	0	1	0	0	1	1	0	0
GCA_014884605.1	Lactococcus	lactis	1	0	1	0	1	1	1	0	0
GCA_014898115.1	Bifidobacterium	longum	1	1	1	0	0	1	1	0	0
GCA_015190465.1	Streptococcus	thermophilus	1	1	1	0	0	1	1	0	0
GCA_015377505.1	Bifidobacterium	animalis	1	1	1	0	0	1	1	0	0
GCA_016127175.1	Veillonella	parvula	1	1	1	0	1	1	1	1	0
GCA_016127535.1	Streptococcus	salivarius	1	1	1	0	1	1	1	0	0
GCA_016724805.1	Sutterella	wadsworthensis	1	0	1	0	0	1	1	1	0
GCA_016726305.1	Bacteroides	caccae	1	0	1	0	1	1	1	0	0
GCA_016838705.1	Bifidobacterium	bifidum	1	1	1	0	0	1	1	0	0
GCA_016864215.1	Bacteroides	xylanisolvens	1	0	1	0	1	1	1	0	1
GCA_016864615.1	Bacteroides	fragilis	1	0	1	0	1	1	1	0	0
GCA_016904015.1	[Ruminococcus]	gnavus	1	1	1	0	1	1	1	0	0
GCA_016904155.1	Coprococcus	comes	1	0	1	1	1	1	1	1	0
GCA_017743195.1	Bifidobacterium	dentium	1	1	1	0	0	1	1	0	0
GCA_017743235.1	Bifidobacterium	pseudocatenulatum	1	1	1	0	0	1	1	0	0
GCA_900186885.1	Veillonella	parvula	1	0	1	1	1	1	1	1	0
GCA_900187035.1	Megamonas	hypermegale	1	1	1	1	1	1	1	0	0
GCA_900187175.1	Odoribacter	splanchnicus	1	1	0	0	1	1	0	0	1
GCA_900537995.1	Roseburia	intestinalis	1	1	1	1	1	1	1	0	0
GCA_900637175.1	Bifidobacterium	dentium	1	0	1	1	0	1	1	0	0

## Sheet: Sup. Table 2
Ingredient (g)	Control	0 Cys	Red 40 Intervention	High Cysteine
L-cysteine	3.98331	0	3.96376	7.96662
L-Isoleucine	7.20789	7.20792	7.17252	7.20789
L-Leucine	14.9848	14.9849	14.9113	14.9848
L-Lysine	12.519	12.519	12.4575	12.519
L-Methionine	1.6	1.6	1.6	1.6
L-Phenylalanine	7.96662	7.96664	7.92752	7.96662
L-Threonine	6.82853	6.82855	6.79502	6.82853
L-Tryptophan	1.99165	1.99166	1.98188	1.99165
L-Valine	8.82018	8.82021	8.7769	8.82018
L-Histidine	4.36267	4.36269	4.34126	4.36267
L-Alanine	4.83687	4.83689	4.81314	4.83687
L-Arginine	5.69044	5.69046	5.66251	5.69044
L-Aspartic Acid	11.4757	11.4758	11.4194	11.4757
L-Glutamic Acid	36.2291	36.2293	36.0513	36.2291
Glycine	2.84522	2.84523	2.83126	2.84522
L-Proline	16.8816	16.8817	16.7988	16.8816
L-Serine	10	20	10	0
L-Tyrosine	8.72534	8.72537	8.68252	8.72534
Total L-Amino Acids	166.351	171.852	165.534	160.85
Corn Starch	364.662	359.163	362.873	370.163
Maltodextrin 10	104.325	104.325	103.813	104.325
Dextrose	142.261	142.261	141.563	142.261
Cellulose, BW200	71.1305	71.1307	70.7814	71.1305
Inulin	23.7102	23.7102	23.5938	23.7102
Soybean Oil	66.3885	66.3887	66.0627	66.3885
Mineral Mix S10026	9.48407	9.4841	9.43752	9.48407
DiCalcium Phosphate	12.3293	12.3293	12.2688	12.3293
Calcium Carbonate	5.21624	5.21626	5.19064	5.21624
Potassium Citrate, 1H2O	15.6487	15.6488	15.5719	15.6487
Sodium Bicarbonate	7.11305	7.11308	7.07814	7.11305
Vitamin Mix V10001	9.48407	9.4841	9.43752	9.48407
Choline Bitartrate	1.89681	1.89682	1.8875	1.89681
FD&C Dye #40	0	0	4.96	0
Total	1000	1000	1000	1000
g	175.4	181.2	175.4	169.6
Protein	663.9	658.1	663.9	669.7
Carbohydrate	70	70	70	70
Fat	100	100	100	100
Fiber		1009.3	1009.3	1009.3
g%
Protein	16.6	17.2	16.6	16.1
Carbohydrate	63	62.4	62.7	63.5
Fat	6.6	6.6	6.6	6.6
Fiber	9.5	9.5	9.4	9.5
kcal
Protein	701	725	701	678
Carbohydrate	2656	2632	2656	2679
Fat	630	630	630	630
Total	3987	3987	3987	3987
kcal%
Protein	18	18	18	17
Carbohydrate	67	66	67	67
Fat	16	16	16	16
Total	100	100	100	100
kcal/gm	3.8	3.8	3.8	3.8

## Sheet: Sup. Table 3
Compound	m/z	Chromatography Protocol		Retention Time (min)
		Time (min)	%B
Sulfasalazine	399	0	5	9.1
		1	5
		9	90
		12	90
		13	5
Sulfapyridine	250	15	5	5.4
Balsalazide	358	0	0	8.3
		1	0
		9	90
		12	90
		13	0
N-aminobutyl-beta-alanine (NABBA)	210	15	0	7
Yellow 6	409	0	0	6.7
		1	0
		7	90
		9	90
Yellow 6 product*	-237	10	0	1.9
Red 40	-451	0	0	4.8
		2	90
		5	90
		6	0
5-amino-6-hydroxy-2-napthenesulfonic acid	-216	10	0	1.4
Congo Red	-651	0	30	5.8
		1	30
		3	90
		6	90
		7	30
Congo Red Product*	185	10	30	1.6

## Sheet: Sup. Table 4
Condition	Media	E. coli	Red 40	Cysteine (2 mM)	Serine
3 mM Red 40	●	●	●	●
0.5 mM Red 40	●	●	●	●
0.25 mM Red 40	●	●	●	●
No Red 40	●	●		●
AA Control	●	●	●		●
Enzymatic Control	●	●	●
Background	●		●

## Sheet: Sup. Table 5
Condition	Sterile	Heat-Killed	Formaldehyde	Background	Cysteine	Serine	BSA	Mucin
Base Media	●	●	●	●	●	●	●	●
Fecal Sample		●	●	●	●	●	●	●
Red 40 (0.5 mM)	●	After Autoclave	●	●	●	●	●	●
Cysteine (10 mM)					●
Serine (10 mM)						●
BSA (1%)							●
Mucin (0.4%)								●
Formaldehyde (4%)			●
Autoclave 3x		●

## Sheet: Sup. Table 6
Geome Assembly	CBS	CSE	CysK	CysM	CyuA	MalY	MetC	SseA	TnaA		Genus	Species	Strain
GCA_900128725.1	0	0	0	0	0	0	0	0	0	GCA_900128725.1	Buchnera	aphidicola	strain=BCifornacula
GCA_003044255.1	1	1	1	1	1	1	1	1	0	GCA_003044255.1	Shewanella	putrefaciens	strain=WS13
GCA_009730575.1	1	1	1	1	1	1	1	1	0	GCA_009730575.1	Shewanella	putrefaciens	strain=FDAARGOS_681
GCA_016406305.1	0	0	0	0	0	0	0	0	0	GCA_016406305.1	Shewanella	putrefaciens	strain=CGMCC-1.6515
GCA_016406325.1	0	0	0	0	0	0	0	0	0	GCA_016406325.1	Shewanella	putrefaciens	strain=ATCC	8071
GCA_017068195.1	1	0	1	1	1	1	1	1	0	GCA_017068195.1	Shewanella	putrefaciens	strain=XY07
GCA_900636665.1	1	0	1	1	1	1	1	1	0	GCA_900636665.1	Shewanella	putrefaciens	strain=NCTC12093
GCA_006400955.1	1	1	1	1	1	1	1	0	0	GCA_006400955.1	Myxococcus	xanthus	strain=GH3.5.6c2
GCA_006401215.1	1	1	1	1	1	1	1	0	0	GCA_006401215.1	Myxococcus	xanthus	strain=GH5.1.9c20
GCA_006401635.1	1	1	1	1	1	1	1	0	0	GCA_006401635.1	Myxococcus	xanthus	strain=KF3.2.8c11
GCA_006402015.1	1	1	1	1	1	1	1	0	0	GCA_006402015.1	Myxococcus	xanthus	strain=KF4.3.9c1
GCA_006402415.1	1	1	1	1	1	1	1	0	0	GCA_006402415.1	Myxococcus	xanthus	strain=MC3.3.5c16
GCA_006402735.1	1	1	1	1	1	1	1	0	0	GCA_006402735.1	Myxococcus	xanthus	strain=MC3.5.9c15
GCA_015775755.1	1	1	1	1	1	1	1	0	0	GCA_015775755.1	Myxococcus	xanthus	strain=DK1622::pDPO-Mxn116-Pvan-Tpase
GCA_016698685.1	1	1	1	1	1	1	1	0	0	GCA_016698685.1	Myxococcus	xanthus	strain=e-3-1
GCA_000219105.1	1	1	1	1	1	1	1	0	0	GCA_000219105.1	Corallococcus	macrosporus	strain=HW-1
GCA_002305875.1	1	1	1	1	1	1	1	0	0	GCA_002305875.1	Cystobacter	fuscus	strain=DSM	52655
GCA_001027285.1	1	1	1	1	1	1	1	1	0	GCA_001027285.1	Archangium	gephyra	strain=DSM	2261
GCA_001189295.1	1	1	1	1	1	1	1	1	0	GCA_001189295.1	Chondromyces	crocatus	strain=Cm	c5
GCA_002950945.1	1	1	1	1	1	1	1	1	0	GCA_002950945.1	Sorangium	cellulosum	strain=So	ce26
GCA_004135735.1	1	1	1	1	1	1	1	1	0	GCA_004135735.1	Sorangium	cellulosum	strain=So	ceGT47
GCA_004135755.1	1	1	1	1	1	1	1	1	0	GCA_004135755.1	Sorangium	cellulosum	strain=So	ce836
GCA_002222655.1	1	1	1	1	1	1	1	1	0	GCA_002222655.1	Vitreoscilla	filiformis	strain=ATCC	15551
GCA_002355975.1	1	1	1	1	1	1	1	1	1	GCA_002355975.1	Lysobacter	enzymogenes	strain=M497-1
GCA_005954665.1	1	1	1	1	1	1	1	1	0	GCA_005954665.1	Lysobacter	enzymogenes	strain=YC36
GCA_017355525.1	1	1	1	1	1	1	1	1	1	GCA_017355525.1	Lysobacter	enzymogenes	strain=CX03
GCA_006738645.1	1	1	1	1	1	1	1	1	0	GCA_006738645.1	Stella	humosa	strain=ATCC	43930
GCA_003149495.1	1	1	1	1	1	1	1	1	0	GCA_003149495.1	Gemmata	obscuriglobus	strain=DSM	5831
GCA_008065095.1	1	1	1	1	1	1	1	1	0	GCA_008065095.1	Gemmata	obscuriglobus	strain=DSM	5831
GCA_007747015.1	1	1	1	1	1	1	1	0	0	GCA_007747015.1	Gimesia	maris	strain=CA11
GCA_008298035.1	1	1	1	1	1	1	1	0	0	GCA_008298035.1	Gimesia	maris	strain=DSM	8797
GCA_009720545.1	1	1	1	1	1	1	1	0	0	GCA_009720545.1	Gimesia	maris	strain=DSM	8797
GCA_009685195.1	1	1	1	1	1	1	1	1	0	GCA_009685195.1	Methylocystis	parvus	strain=BRCS2
GCA_002151465.1	0	0	0	0	1	0	0	0	0	GCA_002151465.1	Borreliella	burgdorferi	strain=PAli
GCA_002151485.1	0	0	0	0	1	0	0	0	0	GCA_002151485.1	Borreliella	burgdorferi	strain=PAbe
GCA_002151505.1	0	0	0	0	1	0	0	0	0	GCA_002151505.1	Borreliella	burgdorferi	strain=B31_NRZ
GCA_002442595.1	0	0	0	0	1	0	0	0	0	GCA_002442595.1	Borreliella	burgdorferi	strain=B331
GCA_003367295.1	0	0	0	0	1	0	0	0	0	GCA_003367295.1	Borreliella	burgdorferi	strain=MM1
GCA_003568645.1	0	0	0	0	1	0	0	0	0	GCA_003568645.1	Borrelia	turicatae	strain=BTE5EL
GCA_002850235.1	1	1	1	1	1	1	1	0	1	GCA_002850235.1	Brachyspira	hyodysenteriae	strain=BH718
GCA_017751165.1	1	0	1	1	1	1	1	0	1	GCA_017751165.1	Brachyspira	hyodysenteriae	strain=BHZ755
GCA_017751185.1	1	0	1	1	1	1	1	0	1	GCA_017751185.1	Brachyspira	hyodysenteriae	strain=BHZ526
GCA_017751205.1	1	0	1	1	1	1	1	0	1	GCA_017751205.1	Brachyspira	hyodysenteriae	strain=BHZ375
GCA_017751225.1	1	0	1	1	1	1	1	0	1	GCA_017751225.1	Brachyspira	hyodysenteriae	strain=Bh743-7x
GCA_005885795.1	0	0	0	0	1	0	0	0	0	GCA_005885795.1	Treponema	pallidum	subsp.	pallidum	strain=X-4
GCA_008152505.1	1	1	0	1	1	1	1	0	1	GCA_008152505.1	Treponema	phagedenis	strain=S11.1
GCA_008152825.1	1	1	0	1	1	1	1	0	1	GCA_008152825.1	Treponema	phagedenis	strain=S2.3
GCA_008153055.1	1	1	0	1	1	1	1	0	1	GCA_008153055.1	Treponema	phagedenis	strain=B31.4
GCA_008153205.1	1	1	0	1	1	1	1	0	1	GCA_008153205.1	Treponema	phagedenis	strain=B36.5
GCA_008153345.1	1	1	0	1	1	1	1	0	1	GCA_008153345.1	Treponema	phagedenis	strain=B43.1
GCA_013348685.1	1	1	0	1	1	1	1	0	1	GCA_013348685.1	Treponema	phagedenis	strain=KS1
GCA_017161245.1	1	1	0	1	1	1	1	0	1	GCA_017161245.1	Treponema	phagedenis	strain=T320A
GCA_017161285.1	1	1	0	1	1	1	1	0	1	GCA_017161285.1	Treponema	phagedenis	strain=Reiter
GCA_005222565.1	1	0	1	1	1	1	1	0	0	GCA_005222565.1	Leptospira	interrogans	strain=FMAS_KW1
GCA_005222585.1	1	0	1	1	1	1	1	0	0	GCA_005222585.1	Leptospira	interrogans	strain=FMAS_KW2
GCA_005222625.1	1	0	1	1	1	1	1	0	0	GCA_005222625.1	Leptospira	interrogans	strain=FMAS_AW1
GCA_008118365.1	1	0	1	1	1	1	1	0	0	GCA_008118365.1	Leptospira	interrogans	serovar	Hardjo	strain=L53
GCA_000632475.2	1	0	1	1	1	1	1	1	0	GCA_000632475.2	Azospirillum	brasilense	strain=Az39
GCA_001315015.1	1	0	1	1	1	1	1	1	0	GCA_001315015.1	Azospirillum	brasilense	strain=Sp	7
GCA_005222145.1	1	0	1	1	1	1	1	1	0	GCA_005222145.1	Azospirillum	brasilense	strain=MTCC4038
GCA_005222165.1	1	1	1	1	1	1	1	1	0	GCA_005222165.1	Azospirillum	brasilense	strain=MTCC4035
GCA_005222205.1	1	1	1	1	1	1	1	1	0	GCA_005222205.1	Azospirillum	brasilense	strain=MTCC4039
GCA_008274945.1	1	0	1	1	1	1	1	1	0	GCA_008274945.1	Azospirillum	brasilense	strain=Sp	7
GCA_008274965.1	1	0	1	1	1	1	1	1	0	GCA_008274965.1	Azospirillum	brasilense	strain=Cd
GCA_000954195.1	1	1	1	1	1	1	1	0	0	GCA_000954195.1	Campylobacter	coli	strain=FB1
GCA_001305715.1	1	1	1	1	1	1	1	0	0	GCA_001305715.1	Campylobacter	coli	strain=BFR-CA-9557
GCA_001417635.1	1	1	1	1	1	1	1	0	0	GCA_001417635.1	Campylobacter	coli	strain=HC2-48
GCA_001483845.1	1	1	1	1	1	1	1	0	0	GCA_001483845.1	Campylobacter	coli	strain=OR12
GCA_001639125.1	1	1	1	1	1	1	1	0	0	GCA_001639125.1	Campylobacter	coli	strain=YH501
GCA_001717605.1	1	1	1	1	1	1	1	0	0	GCA_001717605.1	Campylobacter	coli	strain=14983A
GCA_001865455.1	1	1	1	1	1	1	1	0	0	GCA_001865455.1	Campylobacter	coli	strain=YF2105
GCA_001865475.1	1	1	1	1	1	1	1	0	0	GCA_001865475.1	Campylobacter	coli	strain=MG1116
GCA_001865495.1	1	1	1	1	1	1	1	0	0	GCA_001865495.1	Campylobacter	coli	strain=BP3183
GCA_001865515.1	1	1	1	1	1	1	1	0	0	GCA_001865515.1	Campylobacter	coli	strain=WA333
GCA_001865535.1	1	1	1	1	1	1	1	0	0	GCA_001865535.1	Campylobacter	coli	strain=ZV1224
GCA_001865555.1	1	1	1	1	1	1	1	0	0	GCA_001865555.1	Campylobacter	coli	strain=BG2108
GCA_001936355.1	1	1	1	1	1	1	1	0	0	GCA_001936355.1	Campylobacter	coli	strain=YH502
GCA_002024185.1	0	0	0	0	0	0	0	0	0	GCA_002024185.1	Campylobacter	coli	strain=aerotolerant	OR12
GCA_002407145.1	1	1	1	1	1	1	1	0	0	GCA_002407145.1	Campylobacter	coli	strain=CFSAN032805
GCA_002843985.1	1	1	1	1	1	1	1	0	0	GCA_002843985.1	Campylobacter	coli	strain=YH503
GCA_003030205.1	1	1	1	1	1	1	1	0	0	GCA_003030205.1	Campylobacter	coli	strain=CFSAN054106
GCA_004307315.1	1	1	1	1	1	1	1	0	0	GCA_004307315.1	Campylobacter	coli	strain=RM2228
GCA_005517455.1	1	1	1	1	1	1	1	0	0	GCA_005517455.1	Campylobacter	coli	strain=S9
GCA_008727315.1	0	0	0	0	0	0	0	0	0	GCA_008727315.1	Campylobacter	coli	strain=AR-0420
GCA_008727355.1	0	0	0	0	0	0	0	0	0	GCA_008727355.1	Campylobacter	coli	strain=AR-0418
GCA_008727375.1	0	0	0	0	0	0	0	0	0	GCA_008727375.1	Campylobacter	coli	strain=AR-0417
GCA_008727395.1	0	0	0	0	0	0	0	0	0	GCA_008727395.1	Campylobacter	coli	strain=AR-0416
GCA_008727495.1	0	0	0	0	0	0	0	0	0	GCA_008727495.1	Campylobacter	coli	strain=AR-0411
GCA_009649055.1	1	1	1	1	1	1	1	0	0	GCA_009649055.1	Campylobacter	coli	strain=CFSAN032805
GCA_009730395.1	1	1	1	1	1	1	1	0	0	GCA_009730395.1	Campylobacter	coli	strain=FDAARGOS_735
GCA_010232325.1	0	0	0	0	0	0	0	0	0	GCA_010232325.1	Campylobacter	coli	strain=16SHKX65C
GCA_013391125.1	1	1	1	1	1	1	1	0	0	GCA_013391125.1	Campylobacter	coli	strain=20A420
GCA_014705905.1	1	1	1	1	1	1	1	0	0	GCA_014705905.1	Campylobacter	coli	strain=PSU-32
GCA_014906165.1	1	1	1	1	1	1	1	0	0	GCA_014906165.1	Campylobacter	coli	strain=meC0467
GCA_014906185.1	1	1	1	1	1	1	1	0	0	GCA_014906185.1	Campylobacter	coli	strain=meC0280
GCA_014906205.1	1	1	1	1	1	1	1	0	0	GCA_014906205.1	Campylobacter	coli	strain=meC0281
GCA_016127675.1	1	1	1	1	1	1	1	0	0	GCA_016127675.1	Campylobacter	coli	strain=FDAARGOS_1028
GCA_016406665.1	1	1	1	1	1	1	1	0	0	GCA_016406665.1	Campylobacter	coli	strain=PSU-31
GCA_016406685.1	1	1	1	1	1	1	1	0	0	GCA_016406685.1	Campylobacter	coli	strain=PSU-29
GCA_011600845.2	1	0	1	1	1	1	1	0	0	GCA_011600845.2	Campylobacter	fetus	strain=CFV08A1102-42A
GCA_011600855.2	1	1	1	0	1	1	1	0	0	GCA_011600855.2	Campylobacter	fetus	strain=CFF02A725-35A
GCA_011600945.2	1	0	1	1	1	1	1	0	0	GCA_011600945.2	Campylobacter	fetus	strain=CFF00A031
GCA_011600955.2	1	0	1	1	1	1	1	0	0	GCA_011600955.2	Campylobacter	fetus	strain=CFViADRI1362
GCA_011600995.2	1	0	1	1	1	1	1	0	0	GCA_011600995.2	Campylobacter	fetus	strain=CFF09A980
GCA_011601005.2	1	0	1	1	1	1	1	0	0	GCA_011601005.2	Campylobacter	fetus	strain=CFV08A948-2A
GCA_011601375.2	1	0	1	1	1	1	1	0	0	GCA_011601375.2	Campylobacter	fetus	strain=CFViADRI545
GCA_001314285.1	1	1	1	1	1	1	1	0	0	GCA_001314285.1	Campylobacter	jejuni	strain=RM1285
GCA_001412295.1	1	0	1	1	1	1	1	0	0	GCA_001412295.1	Campylobacter	jejuni	strain=CJM1cam
GCA_001457695.1	1	1	1	1	1	1	1	0	0	GCA_001457695.1	Campylobacter	jejuni	strain=NCTC11351
GCA_001506185.1	1	1	1	1	1	1	1	0	0	GCA_001506185.1	Campylobacter	jejuni	strain=CJ677CC519
GCA_001506205.1	1	1	1	1	1	1	1	0	0	GCA_001506205.1	Campylobacter	jejuni	strain=CJ677CC002
GCA_001506225.1	1	1	1	1	1	1	1	0	0	GCA_001506225.1	Campylobacter	jejuni	strain=CJ677CC534
GCA_001506245.1	1	1	1	1	1	1	1	0	0	GCA_001506245.1	Campylobacter	jejuni	strain=CJ677CC536
GCA_001506265.1	1	1	1	1	1	1	1	0	0	GCA_001506265.1	Campylobacter	jejuni	strain=CJ677CC073
GCA_001506285.1	1	1	1	1	1	1	1	0	0	GCA_001506285.1	Campylobacter	jejuni	strain=CJ677CC521
GCA_001506305.1	1	1	1	1	1	1	1	0	0	GCA_001506305.1	Campylobacter	jejuni	strain=CJ677CC526
GCA_001506325.1	1	1	1	1	1	1	1	0	0	GCA_001506325.1	Campylobacter	jejuni	strain=CJ677CC010
GCA_001506345.1	1	1	1	1	1	1	1	0	0	GCA_001506345.1	Campylobacter	jejuni	strain=CJ677CC036
GCA_001506365.1	1	1	1	1	1	1	1	0	0	GCA_001506365.1	Campylobacter	jejuni	strain=CJ677CC524
GCA_001506385.1	1	1	1	1	1	1	1	0	0	GCA_001506385.1	Campylobacter	jejuni	strain=CJ677CC016
GCA_001506405.1	1	1	1	1	1	1	1	0	0	GCA_001506405.1	Campylobacter	jejuni	strain=CJ677CC041
GCA_001506425.1	1	1	1	1	1	1	1	0	0	GCA_001506425.1	Campylobacter	jejuni	strain=CJ677CC535
GCA_001506445.1	1	1	1	1	1	1	1	0	0	GCA_001506445.1	Campylobacter	jejuni	strain=CJ677CC092
GCA_001506465.1	1	1	1	1	1	1	1	0	0	GCA_001506465.1	Campylobacter	jejuni	strain=CJ677CC530
GCA_001506485.1	1	1	1	1	1	1	1	0	0	GCA_001506485.1	Campylobacter	jejuni	strain=CJ677CC532
GCA_001506505.1	1	1	1	1	1	1	1	0	0	GCA_001506505.1	Campylobacter	jejuni	strain=CJ677CC529
GCA_001506525.1	1	1	1	1	1	1	1	0	0	GCA_001506525.1	Campylobacter	jejuni	strain=CJ677CC531
GCA_001506545.1	1	1	1	1	1	1	1	0	0	GCA_001506545.1	Campylobacter	jejuni	strain=CJ677CC062
GCA_001506565.1	1	1	1	1	1	1	1	0	0	GCA_001506565.1	Campylobacter	jejuni	strain=CJ677CC059
GCA_001506585.1	1	1	1	1	1	1	1	0	0	GCA_001506585.1	Campylobacter	jejuni	strain=CJ677CC032
GCA_001506605.1	1	1	1	1	1	1	1	0	0	GCA_001506605.1	Campylobacter	jejuni	strain=CJ677CC033
GCA_001506625.1	1	1	1	1	1	1	1	0	0	GCA_001506625.1	Campylobacter	jejuni	strain=CJ677CC537
GCA_001506645.1	1	1	1	1	1	1	1	0	0	GCA_001506645.1	Campylobacter	jejuni	strain=CJ677CC542
GCA_001506665.1	1	1	1	1	1	1	1	0	0	GCA_001506665.1	Campylobacter	jejuni	strain=CJ677CC528
GCA_001506685.1	1	1	1	1	1	1	1	0	0	GCA_001506685.1	Campylobacter	jejuni	strain=CJ677CC538
GCA_001506705.1	1	0	1	1	1	1	1	0	0	GCA_001506705.1	Campylobacter	jejuni	strain=CJ677CC520
GCA_001506725.1	1	1	1	1	1	1	1	0	0	GCA_001506725.1	Campylobacter	jejuni	strain=CJ677CC014
GCA_001506745.1	1	1	1	1	1	1	1	0	0	GCA_001506745.1	Campylobacter	jejuni	strain=CJ677CC039
GCA_001506765.1	1	1	1	1	1	1	1	0	0	GCA_001506765.1	Campylobacter	jejuni	strain=CJ677CC085
GCA_001506785.1	1	1	1	1	1	1	1	0	0	GCA_001506785.1	Campylobacter	jejuni	strain=CJ677CC052
GCA_001506805.1	1	1	1	1	1	1	1	0	0	GCA_001506805.1	Campylobacter	jejuni	strain=CJ677CC527
GCA_001506825.1	1	1	1	1	1	1	1	0	0	GCA_001506825.1	Campylobacter	jejuni	strain=CJ677CC078
GCA_001506845.1	1	1	1	1	1	1	1	0	0	GCA_001506845.1	Campylobacter	jejuni	strain=CJ677CC523
GCA_001506865.1	1	1	1	1	1	1	1	0	0	GCA_001506865.1	Campylobacter	jejuni	strain=CJ677CC540
GCA_001506885.1	1	1	1	1	1	1	1	0	0	GCA_001506885.1	Campylobacter	jejuni	strain=CJ677CC040
GCA_001506905.1	1	1	1	1	1	1	1	0	0	GCA_001506905.1	Campylobacter	jejuni	strain=CJ677CC061
GCA_001506925.1	1	1	1	1	1	1	1	0	0	GCA_001506925.1	Campylobacter	jejuni	strain=CJ677CC539
GCA_001506945.1	1	1	1	1	1	1	1	0	0	GCA_001506945.1	Campylobacter	jejuni	strain=CJ677CC533
GCA_001506965.1	1	1	1	1	1	1	1	0	0	GCA_001506965.1	Campylobacter	jejuni	strain=CJ677CC047
GCA_001506985.1	1	1	1	1	1	1	1	0	0	GCA_001506985.1	Campylobacter	jejuni	strain=CJ677CC058
GCA_001507005.1	1	1	1	1	1	1	1	0	0	GCA_001507005.1	Campylobacter	jejuni	strain=CJ677CC013
GCA_001507025.1	1	1	1	1	1	1	1	0	0	GCA_001507025.1	Campylobacter	jejuni	strain=CJ677CC100
GCA_001507045.1	1	1	1	1	1	1	1	0	0	GCA_001507045.1	Campylobacter	jejuni	strain=CJ677CC522
GCA_001507065.1	1	1	1	1	1	1	1	0	0	GCA_001507065.1	Campylobacter	jejuni	strain=CJ677CC094
GCA_001507085.1	1	1	1	1	1	1	1	0	0	GCA_001507085.1	Campylobacter	jejuni	strain=CJ677CC008
GCA_001507105.1	1	1	1	1	1	1	1	0	0	GCA_001507105.1	Campylobacter	jejuni	strain=CJ677CC541
GCA_001507125.1	1	1	1	1	1	1	1	0	0	GCA_001507125.1	Campylobacter	jejuni	strain=CJ677CC024
GCA_001507145.1	1	1	1	1	1	1	1	0	0	GCA_001507145.1	Campylobacter	jejuni	strain=CJ677CC064
GCA_001507165.1	1	1	1	1	1	1	1	0	0	GCA_001507165.1	Campylobacter	jejuni	strain=CJ677CC525
GCA_001507185.1	1	1	1	1	1	1	1	0	0	GCA_001507185.1	Campylobacter	jejuni	strain=CJ677CC026
GCA_001507205.1	1	1	1	1	1	1	1	0	0	GCA_001507205.1	Campylobacter	jejuni	strain=CJ677CC034
GCA_001507225.1	1	1	1	1	1	1	1	0	0	GCA_001507225.1	Campylobacter	jejuni	strain=CJ677CC086
GCA_001507245.1	1	1	1	1	1	1	1	0	0	GCA_001507245.1	Campylobacter	jejuni	strain=CJ677CC095
GCA_001507265.1	1	1	1	1	1	1	1	0	0	GCA_001507265.1	Campylobacter	jejuni	strain=CJ677CC012
GCA_001563565.1	1	1	1	1	1	1	1	0	0	GCA_001563565.1	Campylobacter	jejuni	strain=RM3194
GCA_001587015.1	1	1	1	1	1	1	1	0	0	GCA_001587015.1	Campylobacter	jejuni	strain=OD267
GCA_001587035.1	1	1	1	1	1	1	1	0	0	GCA_001587035.1	Campylobacter	jejuni	strain=WP2202
GCA_001808165.1	1	0	0	0	1	1	1	0	0	GCA_001808165.1	Campylobacter	jejuni	strain=BCW_6920
GCA_001865395.1	1	1	1	1	1	1	1	0	0	GCA_001865395.1	Campylobacter	jejuni	strain=FJ3124
GCA_001865415.1	1	1	1	1	1	1	1	0	0	GCA_001865415.1	Campylobacter	jejuni	strain=TS1218
GCA_001865435.1	1	1	1	1	1	1	1	0	0	GCA_001865435.1	Campylobacter	jejuni	strain=IF1100
GCA_001870085.1	1	1	1	1	1	1	1	0	0	GCA_001870085.1	Campylobacter	jejuni	strain=YQ2210
GCA_001870105.1	1	1	1	1	1	1	1	0	0	GCA_001870105.1	Campylobacter	jejuni	strain=ZP3204
GCA_001879185.2	1	1	1	1	1	1	0	0	0	GCA_001879185.2	Campylobacter	jejuni	strain=D7331
GCA_001951235.1	1	1	1	1	1	1	1	0	0	GCA_001951235.1	Campylobacter	jejuni	strain=HF5-4A-4
GCA_001951255.1	1	1	1	1	1	1	1	0	0	GCA_001951255.1	Campylobacter	jejuni	strain=HF5-5-1
GCA_001951275.1	1	1	1	1	1	1	1	0	0	GCA_001951275.1	Campylobacter	jejuni	strain=HF5-7-1
GCA_001951295.1	1	1	1	1	1	1	1	0	0	GCA_001951295.1	Campylobacter	jejuni	strain=NS4-1-1
GCA_001951315.1	1	1	1	1	1	1	1	0	0	GCA_001951315.1	Campylobacter	jejuni	strain=NS4-5-1
GCA_001951335.1	1	1	1	1	1	1	1	0	0	GCA_001951335.1	Campylobacter	jejuni	strain=NS4-9-1
GCA_002024325.1	1	1	1	1	1	1	1	0	0	GCA_002024325.1	Campylobacter	jejuni	strain=NCTC12662
GCA_002101355.1	1	1	1	1	1	1	1	0	0	GCA_002101355.1	Campylobacter	jejuni	strain=YH002
GCA_002209005.1	1	1	1	1	1	1	0	0	0	GCA_002209005.1	Campylobacter	jejuni	strain=FDAARGOS_262
GCA_002209025.1	1	1	1	1	1	1	1	0	0	GCA_002209025.1	Campylobacter	jejuni	strain=FDAARGOS_263
GCA_002209045.1	1	1	1	1	1	1	1	0	0	GCA_002209045.1	Campylobacter	jejuni	strain=FDAARGOS_265
GCA_002209065.1	1	1	1	1	1	1	1	0	0	GCA_002209065.1	Campylobacter	jejuni	strain=FDAARGOS_266
GCA_002214785.1	1	0	1	1	1	1	1	0	0	GCA_002214785.1	Campylobacter	jejuni	strain=FORC_046
GCA_002224325.1	1	1	1	1	1	1	1	0	0	GCA_002224325.1	Campylobacter	jejuni	strain=11168H/lacY
GCA_002224385.1	1	0	1	1	1	1	1	0	0	GCA_002224385.1	Campylobacter	jejuni	strain=81-176_G1_B0
GCA_002234455.1	1	0	1	1	1	1	1	0	0	GCA_002234455.1	Campylobacter	jejuni	strain=RM1246-ERRC
GCA_002238355.1	1	0	1	1	1	1	1	0	0	GCA_002238355.1	Campylobacter	jejuni	strain=81-176_G1_B7
GCA_002238375.1	1	1	1	1	1	1	1	0	0	GCA_002238375.1	Campylobacter	jejuni	strain=11168H/araE
GCA_002407125.1	1	1	1	1	1	1	1	0	0	GCA_002407125.1	Campylobacter	jejuni	strain=CFSAN032806
GCA_002587105.1	1	1	1	1	1	1	1	0	0	GCA_002587105.1	Campylobacter	jejuni	strain=FDAARGOS_422
GCA_002587225.1	1	1	1	1	1	1	1	0	0	GCA_002587225.1	Campylobacter	jejuni	strain=FDAARGOS_421
GCA_003030185.1	1	1	1	1	1	1	1	0	0	GCA_003030185.1	Campylobacter	jejuni	strain=CFSAN054107
GCA_003060725.1	1	1	1	1	1	1	1	0	0	GCA_003060725.1	Campylobacter	jejuni	strain=12567
GCA_003060745.1	1	1	1	1	1	1	1	0	0	GCA_003060745.1	Campylobacter	jejuni	strain=NCTC	12660
GCA_003060765.1	1	1	1	1	1	1	1	0	0	GCA_003060765.1	Campylobacter	jejuni	strain=NCTC	12661
GCA_003060785.1	1	1	1	1	1	1	1	0	0	GCA_003060785.1	Campylobacter	jejuni	strain=NCTC	12664
GCA_003368045.1	1	0	1	1	1	1	1	0	0	GCA_003368045.1	Campylobacter	jejuni	strain=CJ067CC45
GCA_003368065.1	1	0	1	1	1	1	1	0	0	GCA_003368065.1	Campylobacter	jejuni	strain=CJ515CC45
GCA_003368085.1	1	1	1	1	1	1	1	0	0	GCA_003368085.1	Campylobacter	jejuni	strain=CJ031CC45
GCA_003368105.1	1	1	1	1	1	1	1	0	0	GCA_003368105.1	Campylobacter	jejuni	strain=CJ017CCUA
GCA_003368125.1	1	0	1	1	1	1	1	0	0	GCA_003368125.1	Campylobacter	jejuni	strain=CJ513CC45
GCA_003368145.1	1	1	1	1	1	1	1	0	0	GCA_003368145.1	Campylobacter	jejuni	strain=CJ088CC52
GCA_003368165.1	1	1	1	1	1	1	1	0	0	GCA_003368165.1	Campylobacter	jejuni	strain=CJ074CC443
GCA_003368185.1	1	1	1	1	1	1	1	0	0	GCA_003368185.1	Campylobacter	jejuni	strain=CJ071CC464
GCA_003368205.1	1	0	1	1	1	1	1	0	0	GCA_003368205.1	Campylobacter	jejuni	strain=CJ090CC1332
GCA_003368225.1	1	1	1	1	1	1	1	0	0	GCA_003368225.1	Campylobacter	jejuni	strain=CJ018CCUA
GCA_003368245.1	1	1	1	1	1	1	1	0	0	GCA_003368245.1	Campylobacter	jejuni	strain=CJ066CC508
GCA_004328905.1	1	1	1	1	1	1	1	0	0	GCA_004328905.1	Campylobacter	jejuni	strain=FORC_083
GCA_004924295.1	0	0	0	0	0	0	0	0	0	GCA_004924295.1	Campylobacter	jejuni	strain=BC
GCA_004930695.2	1	1	1	1	1	1	0	0	0	GCA_004930695.2	Campylobacter	jejuni	strain=D7328
GCA_004931315.2	1	1	1	1	1	1	0	0	0	GCA_004931315.2	Campylobacter	jejuni	strain=D7316
GCA_004931595.2	1	1	1	1	1	1	0	0	0	GCA_004931595.2	Campylobacter	jejuni	strain=D7334
GCA_005007655.2	0	0	0	0	0	0	0	0	0	GCA_005007655.2	Campylobacter	jejuni	strain=2017D-0132
GCA_005101645.2	1	1	1	1	1	1	0	0	0	GCA_005101645.2	Campylobacter	jejuni	strain=D7324
GCA_005102005.2	1	1	1	1	1	1	0	0	0	GCA_005102005.2	Campylobacter	jejuni	strain=D7322
GCA_005102505.2	1	1	1	1	1	1	0	0	0	GCA_005102505.2	Campylobacter	jejuni	strain=D7319
GCA_005102825.2	1	1	1	1	1	1	0	0	0	GCA_005102825.2	Campylobacter	jejuni	strain=D7330
GCA_005134285.2	1	1	1	1	1	1	0	0	0	GCA_005134285.2	Campylobacter	jejuni	strain=2014D-0070
GCA_005139685.2	1	1	1	1	1	1	0	0	0	GCA_005139685.2	Campylobacter	jejuni	strain=D7329
GCA_005140225.2	1	1	1	1	1	1	0	0	0	GCA_005140225.2	Campylobacter	jejuni	strain=D7323
GCA_005140245.2	1	1	1	1	1	1	0	0	0	GCA_005140245.2	Campylobacter	jejuni	strain=D7321
GCA_005140505.2	1	1	1	1	1	1	0	0	0	GCA_005140505.2	Campylobacter	jejuni	strain=D7327
GCA_007107025.1	1	1	1	1	1	1	1	0	0	GCA_007107025.1	Campylobacter	jejuni	strain=YH003
GCA_007431745.1	1	1	1	1	1	1	1	0	0	GCA_007431745.1	Campylobacter	jejuni	strain=SCJK2
GCA_008386335.1	1	1	1	1	1	1	1	0	0	GCA_008386335.1	Campylobacter	jejuni	strain=BfR-CA-14430
GCA_008727335.1	0	0	0	0	0	0	0	0	0	GCA_008727335.1	Campylobacter	jejuni	strain=AR-0419
GCA_008727415.1	0	0	0	0	0	0	0	0	0	GCA_008727415.1	Campylobacter	jejuni	strain=AR-0415
GCA_008727435.1	0	0	0	0	0	0	0	0	0	GCA_008727435.1	Campylobacter	jejuni	strain=AR-0414
GCA_008727455.1	0	0	0	0	0	0	0	0	0	GCA_008727455.1	Campylobacter	jejuni	strain=AR-0413
GCA_008727475.1	0	0	0	0	0	0	0	0	0	GCA_008727475.1	Campylobacter	jejuni	strain=AR-0412
GCA_009649035.1	1	1	1	1	1	1	1	0	0	GCA_009649035.1	Campylobacter	jejuni	strain=CFSAN032806
GCA_012220765.1	1	1	1	1	1	1	1	0	0	GCA_012220765.1	Campylobacter	jejuni	strain=ZS007
GCA_012220945.1	1	1	1	1	1	1	1	0	0	GCA_012220945.1	Campylobacter	jejuni	strain=ZS006
GCA_012224585.1	1	1	1	1	1	1	1	0	0	GCA_012224585.1	Campylobacter	jejuni	strain=ZS005
GCA_012224765.1	1	1	1	1	1	1	1	0	0	GCA_012224765.1	Campylobacter	jejuni	strain=ZS004
GCA_012224905.1	1	1	1	1	1	1	1	0	0	GCA_012224905.1	Campylobacter	jejuni	strain=ZH006
GCA_012225065.1	1	1	1	1	1	1	1	0	0	GCA_012225065.1	Campylobacter	jejuni	strain=ZH003
GCA_012225225.1	1	1	1	1	1	1	1	0	0	GCA_012225225.1	Campylobacter	jejuni	strain=ZJB023
GCA_012225445.1	1	1	1	1	1	1	1	0	0	GCA_012225445.1	Campylobacter	jejuni	strain=ZJB021
GCA_012225685.1	1	1	1	1	1	1	1	0	0	GCA_012225685.1	Campylobacter	jejuni	strain=ZJB020
GCA_012889875.1	1	0	1	1	1	1	1	0	0	GCA_012889875.1	Campylobacter	jejuni	strain=CFSAN093257
GCA_012923625.1	1	0	1	1	1	1	1	0	0	GCA_012923625.1	Campylobacter	jejuni	strain=CFSAN096307
GCA_012923645.1	1	1	1	1	1	1	1	0	0	GCA_012923645.1	Campylobacter	jejuni	strain=CFSAN096306
GCA_012923665.1	1	1	1	1	1	1	1	0	0	GCA_012923665.1	Campylobacter	jejuni	strain=CFSAN096305
GCA_012923685.1	1	0	1	1	1	1	1	0	0	GCA_012923685.1	Campylobacter	jejuni	strain=CFSAN096302
GCA_012923705.1	1	1	1	1	1	1	1	0	0	GCA_012923705.1	Campylobacter	jejuni	strain=CFSAN096301
GCA_012923725.1	1	1	1	1	1	1	0	0	0	GCA_012923725.1	Campylobacter	jejuni	strain=CFSAN096297
GCA_012923745.1	1	1	1	1	1	1	1	0	0	GCA_012923745.1	Campylobacter	jejuni	strain=CFSAN096296
GCA_013177475.1	1	1	1	1	1	1	1	0	0	GCA_013177475.1	Campylobacter	jejuni	strain=2016-IZSVE-19-111250
GCA_013389555.1	1	0	1	1	1	1	1	0	0	GCA_013389555.1	Campylobacter	jejuni	strain=D33a
GCA_013389575.1	1	1	1	1	1	1	1	0	0	GCA_013389575.1	Campylobacter	jejuni	strain=A9a
GCA_014082005.1	1	0	1	1	1	1	1	0	0	GCA_014082005.1	Campylobacter	jejuni	strain=C41
GCA_014151305.1	1	1	1	1	1	1	1	0	0	GCA_014151305.1	Campylobacter	jejuni	strain=C1922C72
GCA_014151465.1	1	0	1	1	1	1	1	0	0	GCA_014151465.1	Campylobacter	jejuni	strain=C220
GCA_014151665.1	1	0	1	1	1	1	1	0	0	GCA_014151665.1	Campylobacter	jejuni	strain=C219
GCA_014151825.1	1	1	1	1	1	1	1	0	0	GCA_014151825.1	Campylobacter	jejuni	strain=C203
GCA_014151925.1	1	1	1	1	1	1	1	0	0	GCA_014151925.1	Campylobacter	jejuni	strain=C201
GCA_014152105.1	1	0	1	1	1	1	1	0	0	GCA_014152105.1	Campylobacter	jejuni	strain=C197
GCA_014152305.1	1	1	1	1	1	1	1	0	0	GCA_014152305.1	Campylobacter	jejuni	strain=C109
GCA_014152385.1	1	0	1	1	1	1	1	0	0	GCA_014152385.1	Campylobacter	jejuni	strain=C57
GCA_014152565.1	1	0	1	1	1	1	1	0	0	GCA_014152565.1	Campylobacter	jejuni	strain=C34
GCA_014931235.1	1	1	1	1	1	1	1	0	0	GCA_014931235.1	Campylobacter	jejuni	strain=2014D-0105
GCA_015245165.1	0	0	0	0	0	0	0	0	0	GCA_015245165.1	Campylobacter	jejuni	strain=R4B202
GCA_016350125.1	0	0	0	0	0	0	0	0	0	GCA_016350125.1	Campylobacter	jejuni	strain=RM1221
GCA_016458845.1	1	1	1	1	1	1	1	0	0	GCA_016458845.1	Campylobacter	jejuni	strain=CJP19-D445
GCA_016458865.1	1	1	1	1	1	1	1	0	0	GCA_016458865.1	Campylobacter	jejuni	strain=CJP19-D996
GCA_016600905.1	0	0	0	0	0	0	0	0	0	GCA_016600905.1	Campylobacter	jejuni	strain=RM1221
GCA_016600925.1	0	0	0	0	0	0	0	0	0	GCA_016600925.1	Campylobacter	jejuni	strain=RM1221
GCA_017351955.1	1	1	1	1	1	1	1	0	0	GCA_017351955.1	Campylobacter	jejuni	strain=CAMSA2038
GCA_017352015.1	1	1	1	1	1	1	1	0	0	GCA_017352015.1	Campylobacter	jejuni	strain=CAMSA2002
GCA_017356685.1	1	1	1	1	1	1	1	0	0	GCA_017356685.1	Campylobacter	jejuni	strain=RM1245
GCA_017356745.1	1	1	1	1	1	1	1	0	0	GCA_017356745.1	Campylobacter	jejuni	strain=RM1510
GCA_017356765.1	1	1	1	1	1	1	1	0	0	GCA_017356765.1	Campylobacter	jejuni	strain=RM3147
GCA_017356785.1	1	1	1	1	1	1	1	0	0	GCA_017356785.1	Campylobacter	jejuni	strain=R12
GCA_017356805.1	1	1	1	1	1	1	1	0	0	GCA_017356805.1	Campylobacter	jejuni	strain=GB03
GCA_017356825.1	1	1	1	1	1	1	1	0	0	GCA_017356825.1	Campylobacter	jejuni	strain=R23
GCA_017356845.1	1	1	1	1	1	1	1	0	0	GCA_017356845.1	Campylobacter	jejuni	strain=R31
GCA_017356865.1	1	1	1	1	1	1	1	0	0	GCA_017356865.1	Campylobacter	jejuni	strain=GB28
GCA_017356885.1	1	1	1	1	1	1	1	0	0	GCA_017356885.1	Campylobacter	jejuni	strain=GB60
GCA_017356905.1	1	1	1	1	1	1	1	0	0	GCA_017356905.1	Campylobacter	jejuni	strain=R73
GCA_017356945.1	1	1	1	1	1	1	1	0	0	GCA_017356945.1	Campylobacter	jejuni	strain=GB18
GCA_017356965.1	1	1	1	1	1	1	1	0	0	GCA_017356965.1	Campylobacter	jejuni	strain=R72
GCA_017357025.1	1	1	1	1	1	1	1	0	0	GCA_017357025.1	Campylobacter	jejuni	strain=RM1477
GCA_017977265.1	0	0	0	0	0	0	0	0	0	GCA_017977265.1	Campylobacter	jejuni	strain=PHL110
GCA_900638165.1	1	1	1	1	1	1	1	0	0	GCA_900638165.1	Campylobacter	jejuni	strain=NCTC13268
GCA_900638175.1	1	1	1	1	1	1	1	0	0	GCA_900638175.1	Campylobacter	jejuni	strain=NCTC13266
GCA_900638185.1	1	1	1	1	1	1	1	0	0	GCA_900638185.1	Campylobacter	jejuni	strain=NCTC13265
GCA_900638195.1	1	0	1	1	1	1	1	0	0	GCA_900638195.1	Campylobacter	jejuni	strain=NCTC13261
GCA_900638205.1	1	0	1	1	1	1	1	0	0	GCA_900638205.1	Campylobacter	jejuni	strain=NCTC13255
GCA_900638225.1	1	1	1	1	1	1	1	0	0	GCA_900638225.1	Campylobacter	jejuni	strain=NCTC13257
GCA_900638285.1	1	1	1	1	1	1	1	0	0	GCA_900638285.1	Campylobacter	jejuni	strain=NCTC12851
GCA_902385735.1	0	0	0	0	0	0	0	0	0	GCA_902385735.1	Campylobacter	hyointestinalis
GCA_001298465.1	1	0	0	0	1	1	1	0	0	GCA_001298465.1	Campylobacter	concisus	strain=ATCC	33237
GCA_003048375.1	1	0	1	1	1	1	1	0	0	GCA_003048375.1	Campylobacter	concisus	strain=P2CDO4
GCA_003048595.2	1	0	1	0	1	1	1	0	0	GCA_003048595.2	Campylobacter	concisus	strain=P26UCO-S2
GCA_003048615.2	1	0	1	0	1	1	1	0	0	GCA_003048615.2	Campylobacter	concisus	strain=H16O-S1
GCA_003048675.2	1	0	1	0	1	1	1	0	0	GCA_003048675.2	Campylobacter	concisus	strain=P1CDO2
GCA_003048685.2	1	0	1	0	1	1	1	0	0	GCA_003048685.2	Campylobacter	concisus	strain=P1CDO3
GCA_003048695.2	1	1	1	0	1	1	1	0	0	GCA_003048695.2	Campylobacter	concisus	strain=P10CDO-S2
GCA_003048775.2	1	1	1	0	1	1	1	0	0	GCA_003048775.2	Campylobacter	concisus	strain=P27CDO-S2
GCA_003048835.2	1	0	1	0	1	1	1	0	0	GCA_003048835.2	Campylobacter	concisus	strain=P13UCO-S1
GCA_003048875.2	1	0	1	0	1	1	1	0	0	GCA_003048875.2	Campylobacter	concisus	strain=P11CDO-S1
GCA_015679945.1	1	0	1	0	1	1	1	0	0	GCA_015679945.1	Campylobacter	concisus	strain=P15UCO-S2
GCA_015679965.1	1	1	1	0	1	1	1	0	0	GCA_015679965.1	Campylobacter	concisus	strain=H1O1
GCA_015679985.1	1	1	1	0	1	1	1	0	0	GCA_015679985.1	Campylobacter	concisus	strain=P3UCO1
GCA_015680005.1	1	1	1	0	1	1	1	0	0	GCA_015680005.1	Campylobacter	concisus	strain=P3UCB1
GCA_015680025.1	1	0	1	0	1	1	1	0	0	GCA_015680025.1	Campylobacter	concisus	strain=H9O-S2
GCA_013372125.1	1	1	1	1	1	1	1	0	0	GCA_013372125.1	Campylobacter	curvus	strain=ATCC	35224
GCA_902381815.1	0	0	0	0	0	0	0	0	0	GCA_902381815.1	Campylobacter	curvus
GCA_001017575.1	1	1	1	1	1	1	1	0	0	GCA_001017575.1	Campylobacter	lari	strain=Slaughter	Beach
GCA_010469945.1	1	1	1	1	1	1	1	0	0	GCA_010469945.1	Campylobacter	lari	strain=SCHS02
GCA_014931195.1	1	0	1	1	1	1	1	0	0	GCA_014931195.1	Campylobacter	lari	strain=2014D-0218
GCA_016726265.1	1	0	1	1	1	1	1	0	0	GCA_016726265.1	Campylobacter	lari	strain=FDAARGOS_1101
GCA_900638335.1	1	1	1	1	1	1	1	0	0	GCA_900638335.1	Campylobacter	lari	strain=NCTC11937
GCA_013372205.1	1	0	1	1	1	1	1	0	0	GCA_013372205.1	Campylobacter	mucosalis	strain=ATCC	43264
GCA_004803795.1	1	1	1	1	1	1	1	0	0	GCA_004803795.1	Campylobacter	rectus	strain=ATCC	33238
GCA_004803815.1	1	1	1	1	1	1	1	0	0	GCA_004803815.1	Campylobacter	showae	strain=ATCC	51146
GCA_900699785.1	0	0	0	0	0	0	0	0	0	GCA_900699785.1	Campylobacter	showae
GCA_002220775.1	1	1	1	1	1	1	1	0	0	GCA_002220775.1	Campylobacter	sputorum	strain=RM8705
GCA_000685665.1	1	0	1	1	1	1	1	0	0	GCA_000685665.1	Helicobacter	pylori	strain=BM013A
GCA_000685705.1	1	0	1	1	1	1	1	0	0	GCA_000685705.1	Helicobacter	pylori	strain=BM012B
GCA_000685745.1	1	0	1	1	1	1	1	0	0	GCA_000685745.1	Helicobacter	pylori	strain=BM013B
GCA_000817025.1	1	1	1	1	1	1	1	0	0	GCA_000817025.1	Helicobacter	pylori	strain=Hp238
GCA_000827025.1	1	0	1	1	1	1	1	0	0	GCA_000827025.1	Helicobacter	pylori	strain=26695-1MET
GCA_001433495.1	1	1	1	1	1	1	1	0	0	GCA_001433495.1	Helicobacter	pylori	strain=29CaP
GCA_001433515.1	1	0	1	1	1	1	1	0	0	GCA_001433515.1	Helicobacter	pylori	strain=7C
GCA_001549715.1	0	0	0	0	0	0	0	0	0	GCA_001549715.1	Helicobacter	pylori	strain=ML1
GCA_001549855.1	0	0	0	0	0	0	0	0	0	GCA_001549855.1	Helicobacter	pylori	strain=ML2
GCA_001549875.1	0	0	0	0	0	0	0	0	0	GCA_001549875.1	Helicobacter	pylori	strain=ML3
GCA_001653375.1	1	1	1	1	1	1	1	0	0	GCA_001653375.1	Helicobacter	pylori	strain=L7
GCA_001653395.1	1	0	1	1	1	1	1	0	0	GCA_001653395.1	Helicobacter	pylori	strain=DU15
GCA_001653415.1	1	0	1	1	1	1	1	0	0	GCA_001653415.1	Helicobacter	pylori	strain=CC33C
GCA_001653435.1	1	1	1	1	1	1	1	0	0	GCA_001653435.1	Helicobacter	pylori	strain=ausabrJ05
GCA_001653455.1	0	1	1	1	1	1	1	0	0	GCA_001653455.1	Helicobacter	pylori	strain=K26A1
GCA_001653475.1	1	0	1	1	1	1	1	0	0	GCA_001653475.1	Helicobacter	pylori	strain=PNG84A
GCA_002222575.1	1	0	1	1	1	1	1	0	0	GCA_002222575.1	Helicobacter	pylori	strain=G272
GCA_002356595.1	0	0	0	0	0	0	0	0	0	GCA_002356595.1	Helicobacter	pylori	strain=HPJP26
GCA_002906495.1	1	1	1	1	1	1	1	0	0	GCA_002906495.1	Helicobacter	pylori	strain=dRdM1
GCA_002906515.1	1	1	1	1	1	1	1	0	0	GCA_002906515.1	Helicobacter	pylori	strain=26695-dRdM1dM2
GCA_002906535.1	1	1	1	1	1	1	1	0	0	GCA_002906535.1	Helicobacter	pylori	strain=26695-dR
GCA_002906555.1	1	1	1	1	1	1	1	0	0	GCA_002906555.1	Helicobacter	pylori	strain=26695-dRdM2
GCA_002951975.1	1	1	1	1	1	1	1	0	0	GCA_002951975.1	Helicobacter	pylori	strain=B128_1
GCA_002952335.1	1	1	1	1	1	1	1	0	0	GCA_002952335.1	Helicobacter	pylori	strain=7.13_D1a
GCA_002952355.1	1	1	1	1	1	1	1	0	0	GCA_002952355.1	Helicobacter	pylori	strain=7.13_D1b
GCA_002952375.1	1	1	1	1	1	1	1	0	0	GCA_002952375.1	Helicobacter	pylori	strain=7.13_D1c
GCA_002952455.1	1	1	1	1	1	1	1	0	0	GCA_002952455.1	Helicobacter	pylori	strain=7.13_D3a
GCA_002952475.1	1	1	1	1	1	1	1	0	0	GCA_002952475.1	Helicobacter	pylori	strain=7.13_D3b
GCA_002952495.1	1	1	1	1	1	1	1	0	0	GCA_002952495.1	Helicobacter	pylori
GCA_002952515.1	1	1	1	1	1	1	1	0	0	GCA_002952515.1	Helicobacter	pylori	strain=7.13_R3c
GCA_002952535.1	1	1	1	1	1	1	1	0	0	GCA_002952535.1	Helicobacter	pylori	strain=7.13_R3b
GCA_002952555.1	1	1	1	1	1	1	1	0	0	GCA_002952555.1	Helicobacter	pylori	strain=7.13_R2c
GCA_002952575.1	1	1	1	1	1	1	1	0	0	GCA_002952575.1	Helicobacter	pylori	strain=7.13_R2a
GCA_002952595.1	1	1	1	1	1	1	1	0	0	GCA_002952595.1	Helicobacter	pylori	strain=7.13_R1c
GCA_002952615.1	1	1	1	1	1	1	1	0	0	GCA_002952615.1	Helicobacter	pylori	strain=7.13_R3a
GCA_002952635.1	1	1	1	1	1	1	1	0	0	GCA_002952635.1	Helicobacter	pylori	strain=7.13_R2b
GCA_002952655.1	1	1	1	1	1	1	1	0	0	GCA_002952655.1	Helicobacter	pylori	strain=7.13_R1b
GCA_002952675.1	1	1	1	1	1	1	1	0	0	GCA_002952675.1	Helicobacter	pylori	strain=7.13_R1a
GCA_002953555.1	1	1	1	1	1	1	1	0	0	GCA_002953555.1	Helicobacter	pylori	strain=dRdM2addM2
GCA_002983705.1	1	0	1	1	1	1	1	0	0	GCA_002983705.1	Helicobacter	pylori	strain=FDAARGOS_300
GCA_003050665.1	1	1	1	1	1	1	1	0	0	GCA_003050665.1	Helicobacter	pylori	strain=FDAARGOS_298
GCA_003636855.2	0	0	0	0	0	0	0	0	0	GCA_003636855.2	Helicobacter	pylori	strain=HP14039
GCA_003640585.1	1	0	1	1	1	1	1	0	0	GCA_003640585.1	Helicobacter	pylori	strain=GD63
GCA_003855475.1	0	0	0	0	0	0	0	0	0	GCA_003855475.1	Helicobacter	pylori	strain=Hpbs1
GCA_003939085.1	1	0	1	1	1	1	1	0	0	GCA_003939085.1	Helicobacter	pylori	strain=HP42K
GCA_003957395.1	1	0	1	1	1	1	1	0	0	GCA_003957395.1	Helicobacter	pylori	strain=H-137
GCA_004088075.1	0	0	0	0	0	0	0	0	0	GCA_004088075.1	Helicobacter	pylori	strain=Hpbs3
GCA_004088155.1	0	0	0	0	0	0	0	0	0	GCA_004088155.1	Helicobacter	pylori	strain=Hpbs2
GCA_004295525.1	1	0	1	1	1	1	1	0	0	GCA_004295525.1	Helicobacter	pylori	strain=ATCC	43504
GCA_004295545.1	1	0	1	1	1	1	1	0	0	GCA_004295545.1	Helicobacter	pylori	strain=PMSS1
GCA_006337265.1	0	0	0	0	0	0	0	0	0	GCA_006337265.1	Helicobacter	pylori	strain=479-A2-EK4
GCA_006337285.1	0	0	0	0	0	0	0	0	0	GCA_006337285.1	Helicobacter	pylori	strain=476-A2-EK2
GCA_006337305.1	0	0	0	0	0	0	0	0	0	GCA_006337305.1	Helicobacter	pylori	strain=381-F-EK9
GCA_006337325.1	0	0	0	0	0	0	0	0	0	GCA_006337325.1	Helicobacter	pylori	strain=381-C-EK1
GCA_006337345.1	0	0	0	0	0	0	0	0	0	GCA_006337345.1	Helicobacter	pylori	strain=169-C-EK8
GCA_006337365.1	0	0	0	0	0	0	0	0	0	GCA_006337365.1	Helicobacter	pylori	strain=25-A-EK9
GCA_006337385.1	0	0	0	0	0	0	0	0	0	GCA_006337385.1	Helicobacter	pylori	strain=21-F-EK1
GCA_006337405.1	0	0	0	0	0	0	0	0	0	GCA_006337405.1	Helicobacter	pylori	strain=19-C-EK1
GCA_006337425.1	0	0	0	0	0	0	0	0	0	GCA_006337425.1	Helicobacter	pylori	strain=476-A-EK5
GCA_006337445.1	0	0	0	0	0	0	0	0	0	GCA_006337445.1	Helicobacter	pylori	strain=381-A-EK4
GCA_006337465.1	0	0	0	0	0	0	0	0	0	GCA_006337465.1	Helicobacter	pylori	strain=280-A-EK1
GCA_006337485.1	0	0	0	0	0	0	0	0	0	GCA_006337485.1	Helicobacter	pylori	strain=173-A-EK1
GCA_006337625.1	0	0	0	0	0	0	0	0	0	GCA_006337625.1	Helicobacter	pylori	strain=169-A-EK5
GCA_006337745.1	0	0	0	0	0	0	0	0	0	GCA_006337745.1	Helicobacter	pylori	strain=26-A-EK1
GCA_006337875.1	0	0	0	0	0	0	0	0	0	GCA_006337875.1	Helicobacter	pylori	strain=24-A-EK1
GCA_006338045.1	0	0	0	0	0	0	0	0	0	GCA_006338045.1	Helicobacter	pylori	strain=23-A-EK1
GCA_006338145.1	0	0	0	0	0	0	0	0	0	GCA_006338145.1	Helicobacter	pylori	strain=21-A-EK1
GCA_006338285.1	0	0	0	0	0	0	0	0	0	GCA_006338285.1	Helicobacter	pylori	strain=20-A-EK1
GCA_006338415.1	0	0	0	0	0	0	0	0	0	GCA_006338415.1	Helicobacter	pylori	strain=19-A-EK3
GCA_006338545.1	0	0	0	0	0	0	0	0	0	GCA_006338545.1	Helicobacter	pylori	strain=13-A-EK8
GCA_006338685.1	0	0	0	0	0	0	0	0	0	GCA_006338685.1	Helicobacter	pylori	strain=479-C2-EK2
GCA_006338815.1	0	0	0	0	0	0	0	0	0	GCA_006338815.1	Helicobacter	pylori	strain=476-C-EK5
GCA_006338945.1	0	0	0	0	0	0	0	0	0	GCA_006338945.1	Helicobacter	pylori	strain=479-C-EK2
GCA_006339065.1	0	0	0	0	0	0	0	0	0	GCA_006339065.1	Helicobacter	pylori	strain=478-A-EK1
GCA_006339235.1	0	0	0	0	0	0	0	0	0	GCA_006339235.1	Helicobacter	pylori	strain=25-A-EK1
GCA_006339365.1	0	0	0	0	0	0	0	0	0	GCA_006339365.1	Helicobacter	pylori	strain=5-A-EK1
GCA_007794935.1	1	1	1	1	1	1	1	0	0	GCA_007794935.1	Helicobacter	pylori	strain=B128	7.13
GCA_007836735.1	1	0	1	1	1	1	1	0	0	GCA_007836735.1	Helicobacter	pylori	strain=B125A
GCA_007836855.1	1	1	1	1	1	1	1	0	0	GCA_007836855.1	Helicobacter	pylori	strain=7.13
GCA_007843535.1	1	0	1	1	1	1	1	0	0	GCA_007843535.1	Helicobacter	pylori	strain=B147
GCA_007843715.1	1	0	1	1	1	1	1	0	0	GCA_007843715.1	Helicobacter	pylori	strain=J182
GCA_007843915.1	1	0	1	1	1	1	1	0	0	GCA_007843915.1	Helicobacter	pylori	strain=B140
GCA_007844035.1	1	1	1	1	1	1	1	0	0	GCA_007844035.1	Helicobacter	pylori	strain=B136A
GCA_007844055.1	1	0	1	1	1	1	1	0	0	GCA_007844055.1	Helicobacter	pylori	strain=B130A
GCA_008326525.1	1	0	1	1	1	1	1	0	0	GCA_008326525.1	Helicobacter	pylori	strain=TN2wt
GCA_010917155.1	1	0	1	1	1	1	1	0	0	GCA_010917155.1	Helicobacter	pylori	strain=GCT	27
GCA_010917555.1	1	1	1	1	1	1	1	0	0	GCA_010917555.1	Helicobacter	pylori	strain=GCT	43
GCA_010917675.1	1	0	1	1	1	1	1	0	0	GCA_010917675.1	Helicobacter	pylori	strain=GCT	97
GCA_011456275.1	0	0	0	0	0	0	0	0	0	GCA_011456275.1	Helicobacter	pylori	strain=H1
GCA_011456295.1	0	0	0	0	0	0	0	0	0	GCA_011456295.1	Helicobacter	pylori	strain=125C7
GCA_011456315.1	0	0	0	0	0	0	0	0	0	GCA_011456315.1	Helicobacter	pylori	strain=125A3
GCA_011456475.1	0	0	0	0	0	0	0	0	0	GCA_011456475.1	Helicobacter	pylori	strain=119C10
GCA_011456665.1	0	0	0	0	0	0	0	0	0	GCA_011456665.1	Helicobacter	pylori	strain=119A2
GCA_011456895.1	0	0	0	0	0	0	0	0	0	GCA_011456895.1	Helicobacter	pylori	strain=103C8
GCA_011457115.1	0	0	0	0	0	0	0	0	0	GCA_011457115.1	Helicobacter	pylori	strain=103A4
GCA_011457355.1	0	0	0	0	0	0	0	0	0	GCA_011457355.1	Helicobacter	pylori	strain=87C7
GCA_011457615.1	0	0	0	0	0	0	0	0	0	GCA_011457615.1	Helicobacter	pylori	strain=87A3
GCA_011457815.1	0	0	0	0	0	0	0	0	0	GCA_011457815.1	Helicobacter	pylori	strain=81C9
GCA_011458015.1	0	0	0	0	0	0	0	0	0	GCA_011458015.1	Helicobacter	pylori	strain=81A1
GCA_011458095.1	0	0	0	0	0	0	0	0	0	GCA_011458095.1	Helicobacter	pylori	strain=78C8
GCA_011458315.1	0	0	0	0	0	0	0	0	0	GCA_011458315.1	Helicobacter	pylori	strain=78A3
GCA_011462215.1	0	0	0	0	0	0	0	0	0	GCA_011462215.1	Helicobacter	pylori	strain=48C8
GCA_011462375.1	0	0	0	0	0	0	0	0	0	GCA_011462375.1	Helicobacter	pylori	strain=48A2
GCA_011462575.1	0	0	0	0	0	0	0	0	0	GCA_011462575.1	Helicobacter	pylori	strain=29C8
GCA_011462735.1	0	0	0	0	0	0	0	0	0	GCA_011462735.1	Helicobacter	pylori	strain=29A2
GCA_011462915.1	0	0	0	0	0	0	0	0	0	GCA_011462915.1	Helicobacter	pylori	strain=12C8
GCA_011463035.1	0	0	0	0	0	0	0	0	0	GCA_011463035.1	Helicobacter	pylori	strain=12A3
GCA_011463055.1	0	0	0	0	0	0	0	0	0	GCA_011463055.1	Helicobacter	pylori	strain=8C10
GCA_011463175.1	0	0	0	0	0	0	0	0	0	GCA_011463175.1	Helicobacter	pylori	strain=8A3
GCA_013122035.1	1	1	1	1	1	1	1	0	0	GCA_013122035.1	Helicobacter	pylori	strain=HP9192
GCA_013122055.1	1	1	1	1	1	1	1	0	0	GCA_013122055.1	Helicobacter	pylori	strain=HP1352
GCA_013122115.1	1	1	1	1	1	1	1	0	0	GCA_013122115.1	Helicobacter	pylori	strain=HPY
GCA_016747995.1	1	1	1	1	1	1	1	0	0	GCA_016747995.1	Helicobacter	pylori	strain=ASHA-001
GCA_016748085.1	1	1	1	1	1	1	1	0	0	GCA_016748085.1	Helicobacter	pylori	strain=ASHA-002
GCA_016748175.1	1	1	1	1	1	1	1	0	0	GCA_016748175.1	Helicobacter	pylori	strain=ASHA-003
GCA_016748265.1	1	1	1	1	1	1	1	0	0	GCA_016748265.1	Helicobacter	pylori	strain=ASHA-004
GCA_016748415.1	1	1	1	1	1	1	1	0	0	GCA_016748415.1	Helicobacter	pylori	strain=ASHA-005
GCA_016748555.1	1	1	1	1	1	1	1	0	0	GCA_016748555.1	Helicobacter	pylori	strain=LIM-010
GCA_016748675.1	1	1	1	1	1	1	1	0	0	GCA_016748675.1	Helicobacter	pylori	strain=LIM-009
GCA_016748795.1	1	0	1	1	1	1	1	0	0	GCA_016748795.1	Helicobacter	pylori	strain=LIM-008
GCA_016748925.1	0	0	0	0	0	0	0	0	0	GCA_016748925.1	Helicobacter	pylori	strain=LIM-007
GCA_016749025.1	1	0	1	1	1	1	1	0	0	GCA_016749025.1	Helicobacter	pylori	strain=LIM-006
GCA_016749085.1	1	1	1	1	1	1	1	0	0	GCA_016749085.1	Helicobacter	pylori	strain=LIM-005
GCA_016749215.1	1	0	1	1	1	1	1	0	0	GCA_016749215.1	Helicobacter	pylori	strain=LIM-003
GCA_016749335.1	1	1	1	1	1	1	1	0	0	GCA_016749335.1	Helicobacter	pylori	strain=LIM-001
GCA_016749455.1	1	0	1	1	1	1	1	0	0	GCA_016749455.1	Helicobacter	pylori	strain=PUNO-010
GCA_016749575.1	1	0	1	1	1	1	1	0	0	GCA_016749575.1	Helicobacter	pylori	strain=PUNO-009
GCA_016749715.1	1	1	1	1	1	1	1	0	0	GCA_016749715.1	Helicobacter	pylori	strain=PUNO-008
GCA_016749815.1	1	0	1	1	1	1	1	0	0	GCA_016749815.1	Helicobacter	pylori	strain=PUNO-007
GCA_016755615.1	1	0	1	1	1	1	1	0	0	GCA_016755615.1	Helicobacter	pylori	strain=PUNO-004
GCA_016755635.1	1	0	1	1	1	1	1	0	0	GCA_016755635.1	Helicobacter	pylori	strain=PUNO-003
GCA_016755655.1	1	0	1	1	1	1	1	0	0	GCA_016755655.1	Helicobacter	pylori	strain=PUNO-002
GCA_016755675.1	1	1	1	1	1	1	1	0	0	GCA_016755675.1	Helicobacter	pylori	strain=PUNO-001
GCA_016755695.1	1	0	1	1	1	1	1	0	0	GCA_016755695.1	Helicobacter	pylori	strain=SHIM-014
GCA_016755715.1	1	1	1	1	1	1	1	0	0	GCA_016755715.1	Helicobacter	pylori	strain=SHIM-007
GCA_016755735.1	1	1	1	1	1	1	1	0	0	GCA_016755735.1	Helicobacter	pylori	strain=SHIM-002
GCA_016755755.1	1	1	1	1	1	1	1	0	0	GCA_016755755.1	Helicobacter	pylori	strain=ASHA-010
GCA_016755775.1	1	1	1	1	1	1	1	0	0	GCA_016755775.1	Helicobacter	pylori	strain=ASHA-009
GCA_016755795.1	1	1	1	1	1	1	1	0	0	GCA_016755795.1	Helicobacter	pylori	strain=ASHA-008
GCA_016755815.1	1	0	1	1	1	1	1	0	0	GCA_016755815.1	Helicobacter	pylori	strain=ASHA-006
GCA_016757535.1	1	0	1	1	1	1	1	0	0	GCA_016757535.1	Helicobacter	pylori	strain=LIM-002
GCA_016757555.1	1	0	1	1	1	1	1	0	0	GCA_016757555.1	Helicobacter	pylori	strain=PUNO-006
GCA_016757575.1	1	1	1	1	1	1	1	0	0	GCA_016757575.1	Helicobacter	pylori	strain=SHIM-011
GCA_016757595.1	1	1	1	1	1	1	1	0	0	GCA_016757595.1	Helicobacter	pylori	strain=SHIM-010
GCA_017821235.1	1	1	1	1	1	1	1	0	0	GCA_017821235.1	Helicobacter	pylori	strain=MT5118
GCA_017821275.1	1	1	1	1	1	1	1	0	0	GCA_017821275.1	Helicobacter	pylori	strain=MT5105
GCA_017821355.1	1	0	1	1	1	1	1	0	0	GCA_017821355.1	Helicobacter	pylori	strain=MT5125
GCA_017821475.1	1	0	1	1	1	1	1	0	0	GCA_017821475.1	Helicobacter	pylori	strain=MT5111
GCA_017821535.1	1	0	1	1	1	1	1	0	0	GCA_017821535.1	Helicobacter	pylori	strain=MT5135
GCA_017821595.1	1	0	1	1	1	1	1	0	0	GCA_017821595.1	Helicobacter	pylori	strain=MT5114
GCA_017821615.1	1	1	1	1	1	1	1	0	0	GCA_017821615.1	Helicobacter	pylori	strain=MT5119
GCA_017821635.1	1	0	1	1	1	1	1	0	0	GCA_017821635.1	Helicobacter	pylori	strain=MT5124
GCA_017821655.1	1	1	1	1	1	1	1	0	0	GCA_017821655.1	Helicobacter	pylori	strain=MT5136
GCA_900119955.1	0	0	0	0	0	0	0	0	0	GCA_900119955.1	Helicobacter	pylori
GCA_900119995.1	0	0	0	0	0	0	0	0	0	GCA_900119995.1	Helicobacter	pylori
GCA_900120055.1	0	0	0	0	0	0	0	0	0	GCA_900120055.1	Helicobacter	pylori
GCA_900120135.1	0	0	0	0	0	0	0	0	0	GCA_900120135.1	Helicobacter	pylori
GCA_900120185.1	0	0	0	0	0	0	0	0	0	GCA_900120185.1	Helicobacter	pylori
GCA_900120205.1	0	0	0	0	0	0	0	0	0	GCA_900120205.1	Helicobacter	pylori
GCA_900120225.1	0	0	0	0	0	0	0	0	0	GCA_900120225.1	Helicobacter	pylori
GCA_900120255.1	0	0	0	0	0	0	0	0	0	GCA_900120255.1	Helicobacter	pylori
GCA_900120275.1	0	0	0	0	0	0	0	0	0	GCA_900120275.1	Helicobacter	pylori
GCA_900120315.1	0	0	0	0	0	0	0	0	0	GCA_900120315.1	Helicobacter	pylori
GCA_900120335.1	0	0	0	0	0	0	0	0	0	GCA_900120335.1	Helicobacter	pylori
GCA_900149805.1	1	0	1	1	1	1	1	0	0	GCA_900149805.1	Helicobacter	pylori
GCA_900176185.1	0	0	0	0	0	0	0	0	0	GCA_900176185.1	Helicobacter	pylori
GCA_900638475.1	1	0	1	1	1	1	1	0	0	GCA_900638475.1	Helicobacter	pylori	strain=NCTC13345
GCA_900638505.1	1	0	1	1	1	1	1	0	0	GCA_900638505.1	Helicobacter	pylori	strain=NCTC12823
GCA_902381665.1	0	0	0	0	0	0	0	0	0	GCA_902381665.1	Helicobacter	pylori
GCA_003213725.2	0	0	0	0	0	0	0	0	0	GCA_003213725.2	Helicobacter	cinaedi	strain=P01D0000
GCA_003213825.2	0	0	0	0	0	0	0	0	0	GCA_003213825.2	Helicobacter	cinaedi	strain=P03D0629
GCA_003214155.2	0	0	0	0	0	0	0	0	0	GCA_003214155.2	Helicobacter	cinaedi	strain=P06D0798
GCA_003574195.1	1	1	1	1	1	1	1	0	0	GCA_003574195.1	Helicobacter	cinaedi	strain=MRY08-1234
GCA_014931095.1	1	0	1	0	1	1	1	0	0	GCA_014931095.1	Helicobacter	cinaedi	strain=D7095
GCA_014931155.1	1	0	1	1	1	1	1	0	0	GCA_014931155.1	Helicobacter	cinaedi	strain=2017D-0197
GCA_902381705.1	0	0	0	0	0	0	0	0	0	GCA_902381705.1	Helicobacter	cinaedi
GCA_900476215.1	1	0	0	0	1	1	0	0	0	GCA_900476215.1	Helicobacter	mustelae	strain=NCTC12198
GCA_004328865.1	1	0	1	1	1	1	1	1	0	GCA_004328865.1	Pseudoalteromonas	carrageenovora	strain=KCTC	22325
GCA_000740135.1	1	1	1	1	1	1	1	1	0	GCA_000740135.1	Brucella	abortus	strain=BDW
GCA_000740155.1	1	1	1	1	1	1	1	1	0	GCA_000740155.1	Brucella	abortus	strain=BER
GCA_000740175.1	1	1	1	1	1	1	1	1	0	GCA_000740175.1	Brucella	abortus	strain=NCTC	10505
GCA_000740295.1	1	1	1	1	1	1	1	1	0	GCA_000740295.1	Brucella	abortus	strain=63	75
GCA_000740315.1	1	1	1	1	1	1	1	1	0	GCA_000740315.1	Brucella	abortus	strain=BFY
GCA_001043295.1	1	1	1	1	1	1	1	1	0	GCA_001043295.1	Brucella	abortus	strain=BAB8416
GCA_002262975.1	1	1	1	1	1	1	1	1	0	GCA_002262975.1	Brucella	abortus	strain=BD
GCA_002262995.1	1	1	1	1	1	1	1	1	0	GCA_002262995.1	Brucella	abortus	strain=MC
GCA_002895145.1	1	1	1	1	1	1	1	1	0	GCA_002895145.1	Brucella	abortus	strain=CIIMS-NV-4
GCA_003290345.1	0	0	0	0	0	0	0	0	0	GCA_003290345.1	Brucella	abortus	strain=A19
GCA_003675365.1	1	1	1	1	1	1	1	1	0	GCA_003675365.1	Brucella	abortus	strain=BJ1
GCA_008761575.1	1	1	1	1	1	1	1	1	0	GCA_008761575.1	Brucella	abortus	strain=clpP
GCA_016107505.1	1	0	1	1	1	1	1	1	0	GCA_016107505.1	Brucella	abortus	strain=68
GCA_002022105.1	1	1	1	1	0	1	1	1	1	GCA_002022105.1	Elizabethkingia	meningoseptica	strain=G4076
GCA_002022145.1	1	1	1	1	0	1	1	1	1	GCA_002022145.1	Elizabethkingia	meningoseptica	strain=G4120
GCA_002887275.1	1	1	1	1	0	1	1	1	1	GCA_002887275.1	Elizabethkingia	meningoseptica	strain=KC1913
GCA_007923165.1	1	1	1	1	0	1	0	0	0	GCA_007923165.1	Elizabethkingia	meningoseptica	strain=KC1913
GCA_011612125.1	0	0	0	0	0	0	0	0	0	GCA_011612125.1	Elizabethkingia	meningoseptica	strain=F2
GCA_900475375.1	1	1	1	1	0	1	1	1	1	GCA_900475375.1	Elizabethkingia	meningoseptica	strain=NCTC10016
GCA_003815995.1	1	1	1	1	0	1	1	1	1	GCA_003815995.1	Chryseobacterium	balustinum	strain=KC_1863
GCA_008705155.1	1	1	1	1	0	1	1	1	1	GCA_008705155.1	Empedobacter	brevis	strain=SE1-3
GCA_009834475.1	1	1	1	1	0	1	1	1	1	GCA_009834475.1	Empedobacter	brevis	strain=BCLYD2
GCA_900636535.1	1	1	1	1	0	1	1	1	1	GCA_900636535.1	Chryseobacterium	gleum	strain=NCTC11432
GCA_002025665.1	0	0	0	0	0	0	0	0	0	GCA_002025665.1	Chryseobacterium	indologenes	strain=AA5
GCA_002208925.2	1	1	1	1	0	1	1	1	1	GCA_002208925.2	Chryseobacterium	indologenes	strain=FDAARGOS_337
GCA_002591275.1	1	1	1	1	0	1	1	1	1	GCA_002591275.1	Chryseobacterium	indologenes	strain=FDAARGOS_379
GCA_003812605.1	1	1	1	1	0	1	1	1	1	GCA_003812605.1	Chryseobacterium	indologenes	strain=FDAARGOS_537
GCA_003812865.1	1	1	1	1	0	1	1	1	1	GCA_003812865.1	Chryseobacterium	indologenes	strain=FDAARGOS_510
GCA_003815935.1	1	1	1	1	0	1	1	1	1	GCA_003815935.1	Chryseobacterium	indologenes	strain=H5559
GCA_016025055.1	1	1	1	1	0	1	1	0	1	GCA_016025055.1	Chryseobacterium	indologenes	strain=DSM	16777
GCA_016694815.1	1	1	1	1	0	1	1	1	1	GCA_016694815.1	Chryseobacterium	indologenes	strain=3125
GCA_900683405.1	1	1	1	1	0	1	1	1	1	GCA_900683405.1	Chryseobacterium	indologenes	strain=3012STDY6981895
GCA_003815895.1	1	1	1	1	0	1	1	1	1	GCA_003815895.1	Chryseobacterium	indoltheticum	strain=G0211
GCA_003815915.1	1	1	1	1	0	1	1	1	1	GCA_003815915.1	Chryseobacterium	indoltheticum	strain=ATCC	27950
GCA_016657085.1	1	1	1	1	0	1	1	1	1	GCA_016657085.1	Chryseobacterium	indoltheticum	strain=POL15
GCA_016726985.1	1	1	1	1	0	1	1	0	0	GCA_016726985.1	Myroides	odoratus	strain=FDAARGOS_1131
GCA_016727005.1	1	1	1	1	0	1	1	0	0	GCA_016727005.1	Myroides	odoratus	strain=FDAARGOS_1132
GCA_016724845.1	1	1	1	1	0	1	1	1	0	GCA_016724845.1	Sphingobacterium	spiritivorum	strain=FDAARGOS_1146
GCA_016725325.1	1	1	1	1	0	1	1	1	0	GCA_016725325.1	Sphingobacterium	spiritivorum	strain=FDAARGOS_1145
GCA_016725645.1	1	1	1	1	0	1	1	1	0	GCA_016725645.1	Sphingobacterium	spiritivorum	strain=FDAARGOS_1144
GCA_901482695.1	1	1	1	1	0	1	1	1	0	GCA_901482695.1	Sphingobacterium	thalpophilum	strain=NCTC11429
GCA_001611815.4	1	0	1	1	0	1	0	0	0	GCA_001611815.4	Francisella	tularensis	strain=15NIIEG
GCA_002886065.1	1	0	1	1	0	1	0	0	0	GCA_002886065.1	Francisella	tularensis	strain=12T0050_FLI
GCA_003955775.1	1	0	1	1	0	1	0	0	0	GCA_003955775.1	Francisella	tularensis	strain=FDAARGOS_599
GCA_003955795.1	1	0	1	1	0	1	0	0	0	GCA_003955795.1	Francisella	tularensis	strain=FDAARGOS_598
GCA_003955815.1	1	0	1	1	0	1	0	0	0	GCA_003955815.1	Francisella	tularensis	strain=FDAARGOS_595
GCA_014931515.1	1	0	1	1	0	1	0	0	0	GCA_014931515.1	Francisella	tularensis	strain=NR-28537
GCA_000834965.1	1	0	1	1	0	1	0	0	0	GCA_000834965.1	Francisella	tularensis	subsp.	novicida	strain=DPG
GCA_001880205.1	1	0	1	1	0	1	0	0	0	GCA_001880205.1	Francisella	tularensis	subsp.	novicida	strain=AL97-2214
GCA_001880245.1	1	0	1	1	0	1	0	0	0	GCA_001880245.1	Francisella	tularensis	subsp.	novicida	strain=AZ06-7470
GCA_002952075.1	1	0	1	1	0	1	1	0	0	GCA_002952075.1	Francisella	tularensis	subsp.	novicida	strain=TCH2015
GCA_004063735.1	1	1	1	1	0	1	1	1	0	GCA_004063735.1	Paracoccus	denitrificans	strain=ATCC	19367
GCA_002355995.1	1	1	1	1	0	1	1	1	0	GCA_002355995.1	Thermus	thermophilus	strain=TMY
GCA_007165405.1	1	1	1	1	0	1	1	1	0	GCA_007165405.1	Thermus	thermophilus	strain=AA2-29
GCA_007165645.1	1	1	1	1	0	1	1	1	0	GCA_007165645.1	Thermus	thermophilus	strain=AA2-20
GCA_007182855.1	1	1	1	1	0	1	1	1	0	GCA_007182855.1	Thermus	thermophilus	strain=HC11
GCA_016629545.1	1	0	1	0	0	1	1	1	0	GCA_016629545.1	Thermus	thermophilus	strain=HB5018
GCA_016865275.1	1	1	1	0	0	1	1	1	0	GCA_016865275.1	Thermus	thermophilus	strain=HB5002
GCA_016865295.1	1	1	1	0	0	1	1	1	0	GCA_016865295.1	Thermus	thermophilus	strain=HB5008
GCA_900604845.1	1	1	1	1	0	1	1	1	0	GCA_900604845.1	Thermus	thermophilus
GCA_008727115.1	0	0	0	0	0	0	0	0	0	GCA_008727115.1	Comamonas	testosteroni	strain=NFYY023
GCA_014076415.1	0	0	0	0	0	0	0	0	0	GCA_014076415.1	Comamonas	testosteroni	strain=T5-67
GCA_014076475.1	0	0	0	0	0	0	0	0	0	GCA_014076475.1	Comamonas	testosteroni	strain=R5-28
GCA_000763245.3	1	1	1	1	1	1	1	1	0	GCA_000763245.3	Pseudomonas	aeruginosa	strain=CCBH4851
GCA_000816985.1	1	1	1	1	1	1	1	1	0	GCA_000816985.1	Pseudomonas	aeruginosa	strain=F22031
GCA_000829255.1	1	1	1	1	1	1	1	1	0	GCA_000829255.1	Pseudomonas	aeruginosa	strain=NCGM	1984
GCA_000829275.1	1	1	1	1	1	1	1	1	0	GCA_000829275.1	Pseudomonas	aeruginosa	strain=NCGM	1900
GCA_000829885.1	1	1	1	1	1	1	1	1	0	GCA_000829885.1	Pseudomonas	aeruginosa	strain=FRD1
GCA_000981825.1	1	1	1	1	1	1	1	1	0	GCA_000981825.1	Pseudomonas	aeruginosa	strain=Carb01	63
GCA_001077475.1	1	1	1	1	1	1	1	1	0	GCA_001077475.1	Pseudomonas	aeruginosa	strain=F9676
GCA_001293085.1	1	1	1	1	1	1	1	1	0	GCA_001293085.1	Pseudomonas	aeruginosa	strain=PA1RG
GCA_001447845.1	1	1	1	1	1	1	1	1	0	GCA_001447845.1	Pseudomonas	aeruginosa	strain=VA-134
GCA_001457615.1	1	1	1	1	1	1	1	1	0	GCA_001457615.1	Pseudomonas	aeruginosa	strain=NCTC10332
GCA_001465155.1	1	1	1	1	1	1	1	1	0	GCA_001465155.1	Pseudomonas	aeruginosa	strain=Cu1510
GCA_001482325.1	1	1	1	1	1	1	1	1	0	GCA_001482325.1	Pseudomonas	aeruginosa	strain=12-4-4(59)
GCA_001515845.2	1	1	1	1	1	1	1	1	0	GCA_001515845.2	Pseudomonas	aeruginosa	strain=S86968
GCA_001515915.2	1	1	1	1	1	1	1	1	0	GCA_001515915.2	Pseudomonas	aeruginosa	strain=T38079
GCA_001516005.1	1	1	1	1	1	1	1	1	0	GCA_001516005.1	Pseudomonas	aeruginosa	strain=T52373
GCA_001516105.1	1	1	1	1	1	1	1	1	0	GCA_001516105.1	Pseudomonas	aeruginosa	strain=T63266
GCA_001516165.2	1	1	1	1	1	1	1	1	0	GCA_001516165.2	Pseudomonas	aeruginosa	strain=W16407
GCA_001516185.2	1	1	1	1	1	1	1	1	0	GCA_001516185.2	Pseudomonas	aeruginosa	strain=W36662
GCA_001516205.2	1	1	1	1	1	1	1	1	0	GCA_001516205.2	Pseudomonas	aeruginosa	strain=W45909
GCA_001516225.2	1	1	1	1	1	1	1	1	0	GCA_001516225.2	Pseudomonas	aeruginosa	strain=W60856
GCA_001516245.2	1	1	1	1	1	1	1	1	0	GCA_001516245.2	Pseudomonas	aeruginosa	strain=F23197
GCA_001516265.1	1	1	1	1	1	1	1	1	0	GCA_001516265.1	Pseudomonas	aeruginosa	strain=F30658
GCA_001516305.2	1	1	1	1	1	1	1	1	0	GCA_001516305.2	Pseudomonas	aeruginosa	strain=H5708
GCA_001516325.2	1	1	1	1	1	1	1	1	0	GCA_001516325.2	Pseudomonas	aeruginosa	strain=H27930
GCA_001516345.1	1	1	1	1	1	1	1	1	0	GCA_001516345.1	Pseudomonas	aeruginosa	strain=H47921
GCA_001516365.2	1	1	1	1	1	1	1	1	0	GCA_001516365.2	Pseudomonas	aeruginosa	strain=M1608
GCA_001516385.1	1	1	1	1	1	1	1	1	0	GCA_001516385.1	Pseudomonas	aeruginosa	strain=M37351
GCA_001518975.1	1	1	1	1	1	1	1	1	0	GCA_001518975.1	Pseudomonas	aeruginosa	strain=USDA-ARS-USMARC-41639
GCA_001542795.2	1	1	1	1	1	1	1	1	0	GCA_001542795.2	Pseudomonas	aeruginosa	strain=X78812
GCA_001542835.1	1	1	1	1	1	1	1	1	0	GCA_001542835.1	Pseudomonas	aeruginosa	strain=F9670
GCA_001547955.1	1	1	1	1	1	1	1	1	0	GCA_001547955.1	Pseudomonas	aeruginosa	strain=NCGM257
GCA_001548135.1	1	1	1	1	1	1	1	1	0	GCA_001548135.1	Pseudomonas	aeruginosa	strain=8380
GCA_001548335.1	1	1	1	1	1	1	1	1	0	GCA_001548335.1	Pseudomonas	aeruginosa	strain=IOMTU	133
GCA_001594325.2	1	1	1	1	1	1	1	1	0	GCA_001594325.2	Pseudomonas	aeruginosa	strain=F63912
GCA_001606045.1	1	1	1	1	1	1	1	1	0	GCA_001606045.1	Pseudomonas	aeruginosa	strain=N17-1
GCA_001618925.1	1	1	1	1	1	1	1	1	0	GCA_001618925.1	Pseudomonas	aeruginosa	strain=ATCC	27853
GCA_001632245.1	1	1	1	1	1	1	1	1	0	GCA_001632245.1	Pseudomonas	aeruginosa	strain=BAMCPA07-48
GCA_001679685.1	1	1	1	1	1	1	1	1	0	GCA_001679685.1	Pseudomonas	aeruginosa	strain=PA121617
GCA_001687285.1	1	1	1	1	1	1	1	1	0	GCA_001687285.1	Pseudomonas	aeruginosa	strain=ATCC	27853
GCA_001721745.1	1	1	1	1	1	1	1	1	0	GCA_001721745.1	Pseudomonas	aeruginosa	strain=PA_D1
GCA_001721765.1	1	1	1	1	1	1	1	1	0	GCA_001721765.1	Pseudomonas	aeruginosa	strain=PA_D2
GCA_001721785.1	1	1	1	1	1	1	1	1	0	GCA_001721785.1	Pseudomonas	aeruginosa	strain=PA_D9
GCA_001721805.1	1	1	1	1	1	1	1	1	0	GCA_001721805.1	Pseudomonas	aeruginosa	strain=PA_D16
GCA_001721825.1	1	1	1	1	1	1	1	1	0	GCA_001721825.1	Pseudomonas	aeruginosa	strain=PA_D22
GCA_001721845.1	1	1	1	1	1	1	1	1	0	GCA_001721845.1	Pseudomonas	aeruginosa	strain=PA_D25
GCA_001722005.2	1	1	1	1	1	1	1	1	0	GCA_001722005.2	Pseudomonas	aeruginosa	strain=DN1
GCA_001722025.1	1	1	1	1	1	1	1	1	0	GCA_001722025.1	Pseudomonas	aeruginosa	strain=PA_D5
GCA_001722045.1	1	1	1	1	1	1	1	1	0	GCA_001722045.1	Pseudomonas	aeruginosa	strain=PA_D21
GCA_001729505.1	1	1	1	1	1	1	1	1	0	GCA_001729505.1	Pseudomonas	aeruginosa	strain=ATCC	15692
GCA_001750705.1	1	1	1	1	1	1	1	1	0	GCA_001750705.1	Pseudomonas	aeruginosa	strain=FA-HZ1
GCA_001792835.1	1	1	1	1	1	1	1	1	0	GCA_001792835.1	Pseudomonas	aeruginosa	strain=PA1088
GCA_001792855.1	1	1	1	1	1	1	1	1	0	GCA_001792855.1	Pseudomonas	aeruginosa	strain=PA8281
GCA_001792875.1	1	1	1	1	1	1	1	1	0	GCA_001792875.1	Pseudomonas	aeruginosa	strain=PA11803
GCA_001870265.1	1	1	1	1	1	1	1	1	0	GCA_001870265.1	Pseudomonas	aeruginosa	strain=PA7790
GCA_001874465.1	1	1	1	1	1	1	1	1	0	GCA_001874465.1	Pseudomonas	aeruginosa
GCA_001879525.1	1	1	1	1	1	1	1	1	0	GCA_001879525.1	Pseudomonas	aeruginosa	strain=PAER4_119
GCA_001900195.1	1	1	1	1	1	1	1	1	0	GCA_001900195.1	Pseudomonas	aeruginosa	strain=SCVFeb
GCA_001900225.1	1	1	1	1	1	1	1	1	0	GCA_001900225.1	Pseudomonas	aeruginosa	strain=SCVJan
GCA_001900265.1	1	1	1	1	1	1	1	1	0	GCA_001900265.1	Pseudomonas	aeruginosa	strain=NHmuc
GCA_002075065.1	1	1	1	1	1	1	1	1	0	GCA_002075065.1	Pseudomonas	aeruginosa	strain=PA_154197
GCA_002085605.1	1	1	1	1	1	1	1	1	0	GCA_002085605.1	Pseudomonas	aeruginosa	strain=RIVM-EMC2982
GCA_002085755.1	1	1	1	1	1	1	1	1	0	GCA_002085755.1	Pseudomonas	aeruginosa	strain=E6130952
GCA_002104595.1	1	1	1	1	1	1	1	1	0	GCA_002104595.1	Pseudomonas	aeruginosa	strain=PASGNDM699
GCA_002104615.1	1	1	1	1	1	1	1	1	0	GCA_002104615.1	Pseudomonas	aeruginosa	strain=PASGNDM345
GCA_002192475.1	1	1	1	1	1	1	1	1	0	GCA_002192475.1	Pseudomonas	aeruginosa	strain=Pa124
GCA_002192495.1	1	1	1	1	1	1	1	1	0	GCA_002192495.1	Pseudomonas	aeruginosa	strain=Pa58
GCA_002205335.1	1	1	1	1	1	1	1	1	0	GCA_002205335.1	Pseudomonas	aeruginosa	strain=Pa84
GCA_002205355.1	1	1	1	1	1	1	1	1	0	GCA_002205355.1	Pseudomonas	aeruginosa	strain=Pa127
GCA_002205375.1	1	1	1	1	1	1	1	1	0	GCA_002205375.1	Pseudomonas	aeruginosa	strain=Pa1242
GCA_002208645.1	1	1	1	1	1	1	1	1	0	GCA_002208645.1	Pseudomonas	aeruginosa	strain=Pa1207
GCA_002215345.1	1	1	1	1	1	1	1	1	0	GCA_002215345.1	Pseudomonas	aeruginosa	strain=PA83
GCA_002223805.1	1	1	1	1	1	1	1	1	0	GCA_002223805.1	Pseudomonas	aeruginosa	strain=L10
GCA_002237405.1	1	1	1	1	1	1	1	1	0	GCA_002237405.1	Pseudomonas	aeruginosa	strain=Ocean-1155
GCA_002237425.1	1	1	1	1	1	1	1	1	0	GCA_002237425.1	Pseudomonas	aeruginosa	strain=Ocean-1175
GCA_002287725.2	1	1	1	1	1	1	1	1	0	GCA_002287725.2	Pseudomonas	aeruginosa	strain=PPF-1
GCA_002411865.3	1	1	1	1	1	1	1	1	0	GCA_002411865.3	Pseudomonas	aeruginosa	strain=97
GCA_002442855.1	1	1	1	1	1	1	1	1	0	GCA_002442855.1	Pseudomonas	aeruginosa	strain=PA_150577
GCA_002753655.1	0	0	0	0	0	0	0	0	0	GCA_002753655.1	Pseudomonas	aeruginosa	strain=12939
GCA_002812825.1	1	1	1	1	1	1	1	1	0	GCA_002812825.1	Pseudomonas	aeruginosa	strain=PB369
GCA_002812845.1	1	1	1	1	1	1	1	1	0	GCA_002812845.1	Pseudomonas	aeruginosa	strain=PB368
GCA_002812865.1	1	1	1	1	1	1	1	1	0	GCA_002812865.1	Pseudomonas	aeruginosa	strain=PB353
GCA_002812885.1	1	1	1	1	1	1	1	1	0	GCA_002812885.1	Pseudomonas	aeruginosa	strain=PB354
GCA_002812905.2	1	1	1	1	1	1	1	1	0	GCA_002812905.2	Pseudomonas	aeruginosa	strain=PB350
GCA_002812925.3	1	1	1	1	1	1	1	1	0	GCA_002812925.3	Pseudomonas	aeruginosa	strain=PB367
GCA_002946935.1	1	1	1	1	1	1	1	1	0	GCA_002946935.1	Pseudomonas	aeruginosa	strain=F5677
GCA_002968515.1	1	1	1	1	1	1	1	1	0	GCA_002968515.1	Pseudomonas	aeruginosa	strain=AR_0360
GCA_002968585.1	1	1	1	1	1	1	1	1	0	GCA_002968585.1	Pseudomonas	aeruginosa	strain=AR_0354
GCA_002968655.1	1	1	1	1	1	1	1	1	0	GCA_002968655.1	Pseudomonas	aeruginosa	strain=AR_0353
GCA_002968695.1	1	1	1	1	1	1	1	1	0	GCA_002968695.1	Pseudomonas	aeruginosa	strain=AR_0230
GCA_002968755.1	1	1	1	1	1	1	1	1	0	GCA_002968755.1	Pseudomonas	aeruginosa	strain=AR_0356
GCA_002968955.1	1	1	1	1	1	1	1	1	0	GCA_002968955.1	Pseudomonas	aeruginosa	strain=AR_0357
GCA_002997005.1	1	1	1	1	1	1	1	1	0	GCA_002997005.1	Pseudomonas	aeruginosa	strain=AR_0095
GCA_003025345.2	1	1	1	1	1	1	1	1	0	GCA_003025345.2	Pseudomonas	aeruginosa	strain=CR1
GCA_003028335.1	1	1	1	1	1	1	1	1	0	GCA_003028335.1	Pseudomonas	aeruginosa	strain=MRSN12280
GCA_003052005.2	1	1	1	1	1	1	1	1	0	GCA_003052005.2	Pseudomonas	aeruginosa	strain=WCHPA075019
GCA_003060845.1	0	0	0	0	0	0	0	0	0	GCA_003060845.1	Pseudomonas	aeruginosa	strain=JB2
GCA_003073615.1	1	1	1	1	1	1	1	1	0	GCA_003073615.1	Pseudomonas	aeruginosa	strain=AR444
GCA_003073695.1	1	1	1	1	1	1	1	1	0	GCA_003073695.1	Pseudomonas	aeruginosa	strain=AR441
GCA_003073735.1	1	1	1	1	1	1	1	1	0	GCA_003073735.1	Pseudomonas	aeruginosa	strain=AR445
GCA_003073795.1	1	1	1	1	1	1	1	1	0	GCA_003073795.1	Pseudomonas	aeruginosa	strain=AR442
GCA_003073895.1	1	1	1	1	1	1	1	1	0	GCA_003073895.1	Pseudomonas	aeruginosa	strain=AR439
GCA_003193645.1	1	0	1	1	1	1	1	1	0	GCA_003193645.1	Pseudomonas	aeruginosa	strain=AR_0446
GCA_003194245.1	1	1	1	1	1	1	1	1	0	GCA_003194245.1	Pseudomonas	aeruginosa	strain=CCUG	70744
GCA_003204335.1	1	1	1	1	1	1	1	1	0	GCA_003204335.1	Pseudomonas	aeruginosa	strain=AR_0110
GCA_003206535.1	1	1	1	1	1	1	1	1	0	GCA_003206535.1	Pseudomonas	aeruginosa	strain=K34-7
GCA_003288335.1	1	1	1	1	1	1	1	1	0	GCA_003288335.1	Pseudomonas	aeruginosa	strain=AR_460
GCA_003288355.1	1	1	1	1	1	1	1	1	0	GCA_003288355.1	Pseudomonas	aeruginosa	strain=AR_455
GCA_003288435.1	1	1	1	1	1	1	1	1	0	GCA_003288435.1	Pseudomonas	aeruginosa	strain=AR_458
GCA_003319235.1	1	1	1	1	1	1	1	1	0	GCA_003319235.1	Pseudomonas	aeruginosa	strain=HS9
GCA_003332705.2	1	1	1	1	1	1	1	1	0	GCA_003332705.2	Pseudomonas	aeruginosa	strain=PA34
GCA_003369735.1	1	1	1	1	1	1	1	1	0	GCA_003369735.1	Pseudomonas	aeruginosa	strain=Y89
GCA_003369755.1	1	1	1	1	1	1	1	1	0	GCA_003369755.1	Pseudomonas	aeruginosa	strain=Y82
GCA_003369775.1	1	1	1	1	1	1	1	1	0	GCA_003369775.1	Pseudomonas	aeruginosa	strain=Y31
GCA_003408495.1	1	1	1	1	1	1	1	1	0	GCA_003408495.1	Pseudomonas	aeruginosa	strain=Y71
GCA_003411785.2	1	1	1	1	1	1	1	1	0	GCA_003411785.2	Pseudomonas	aeruginosa	strain=PABL048
GCA_003429185.1	1	1	1	1	1	1	1	1	0	GCA_003429185.1	Pseudomonas	aeruginosa	strain=PABL012
GCA_003429205.1	1	1	1	1	1	1	1	1	0	GCA_003429205.1	Pseudomonas	aeruginosa	strain=PABL017
GCA_003433235.1	1	1	1	1	1	1	1	1	0	GCA_003433235.1	Pseudomonas	aeruginosa	strain=24Pae112
GCA_003571505.1	1	1	1	1	1	1	1	1	0	GCA_003571505.1	Pseudomonas	aeruginosa	strain=N15-01092
GCA_003571805.1	1	1	1	1	1	1	1	1	0	GCA_003571805.1	Pseudomonas	aeruginosa	strain=AR_0111
GCA_003626935.2	1	1	1	1	1	1	1	1	0	GCA_003626935.2	Pseudomonas	aeruginosa	strain=BA7823
GCA_003641125.1	1	1	1	1	1	1	1	1	0	GCA_003641125.1	Pseudomonas	aeruginosa	strain=268
GCA_003691345.1	1	1	1	1	1	1	1	1	0	GCA_003691345.1	Pseudomonas	aeruginosa	strain=PA-3
GCA_003713085.1	1	1	1	1	1	1	1	1	0	GCA_003713085.1	Pseudomonas	aeruginosa	strain=BA15561
GCA_003716765.1	1	1	1	1	1	1	1	1	0	GCA_003716765.1	Pseudomonas	aeruginosa	strain=SP4528
GCA_003798105.1	1	1	1	1	1	1	1	1	0	GCA_003798105.1	Pseudomonas	aeruginosa	strain=H26027
GCA_003798125.1	1	1	1	1	1	1	1	1	0	GCA_003798125.1	Pseudomonas	aeruginosa	strain=H25883
GCA_003798145.1	1	1	1	1	1	1	1	1	0	GCA_003798145.1	Pseudomonas	aeruginosa	strain=H26023
GCA_003812165.1	1	1	1	1	1	1	1	1	0	GCA_003812165.1	Pseudomonas	aeruginosa	strain=FDAARGOS_532
GCA_003812885.1	1	1	1	1	1	1	1	1	0	GCA_003812885.1	Pseudomonas	aeruginosa	strain=FDAARGOS_571
GCA_003812905.1	1	1	1	1	1	1	1	1	0	GCA_003812905.1	Pseudomonas	aeruginosa	strain=FDAARGOS_501
GCA_003813005.1	1	1	1	1	1	1	1	1	0	GCA_003813005.1	Pseudomonas	aeruginosa	strain=FDAARGOS_505
GCA_003813025.1	1	1	1	1	1	1	1	1	0	GCA_003813025.1	Pseudomonas	aeruginosa	strain=FDAARGOS_570
GCA_003950015.1	1	1	1	1	1	1	1	1	0	GCA_003950015.1	Pseudomonas	aeruginosa	strain=IMP-13
GCA_003950235.1	1	1	1	1	1	1	1	1	0	GCA_003950235.1	Pseudomonas	aeruginosa	strain=B41226
GCA_003950255.1	1	1	1	1	1	1	1	1	0	GCA_003950255.1	Pseudomonas	aeruginosa	strain=SP4371
GCA_003952285.1	1	1	1	1	1	1	1	1	0	GCA_003952285.1	Pseudomonas	aeruginosa	strain=SP2230
GCA_003952305.1	1	1	1	1	1	1	1	1	0	GCA_003952305.1	Pseudomonas	aeruginosa	strain=B14130
GCA_003952325.1	1	1	1	1	1	1	1	1	0	GCA_003952325.1	Pseudomonas	aeruginosa	strain=B17932
GCA_003957825.1	1	1	1	1	1	1	1	1	0	GCA_003957825.1	Pseudomonas	aeruginosa	strain=GIMC5015:PAKB6
GCA_003991465.1	1	1	1	1	1	1	1	1	0	GCA_003991465.1	Pseudomonas	aeruginosa	strain=SP4527
GCA_004010895.1	1	1	1	1	1	1	1	1	0	GCA_004010895.1	Pseudomonas	aeruginosa	strain=LW
GCA_004014755.2	1	1	1	1	1	1	1	1	0	GCA_004014755.2	Pseudomonas	aeruginosa	strain=PA0750
GCA_004102665.1	1	1	1	1	1	1	1	1	0	GCA_004102665.1	Pseudomonas	aeruginosa	strain=PAO1161
GCA_004193735.1	1	1	1	1	1	1	1	1	0	GCA_004193735.1	Pseudomonas	aeruginosa	strain=1334/14
GCA_004291075.1	1	1	1	1	1	1	1	1	0	GCA_004291075.1	Pseudomonas	aeruginosa	strain=E80
GCA_004355125.1	1	1	1	1	1	1	1	1	0	GCA_004355125.1	Pseudomonas	aeruginosa	strain=AES1M
GCA_004355145.1	1	1	1	1	1	1	1	1	0	GCA_004355145.1	Pseudomonas	aeruginosa	strain=AES1R
GCA_005305005.1	1	1	1	1	1	1	1	1	0	GCA_005305005.1	Pseudomonas	aeruginosa	strain=PA298
GCA_006364735.1	1	1	1	1	1	1	1	1	0	GCA_006364735.1	Pseudomonas	aeruginosa	strain=FDAARGOS_767
GCA_006364795.1	1	1	1	1	1	1	1	1	0	GCA_006364795.1	Pseudomonas	aeruginosa	strain=FDAARGOS_610
GCA_006971785.1	1	1	1	1	1	1	1	1	0	GCA_006971785.1	Pseudomonas	aeruginosa	strain=AZPAE15042
GCA_007559065.1	1	1	1	1	1	1	1	1	0	GCA_007559065.1	Pseudomonas	aeruginosa	strain=60503
GCA_007559085.1	1	1	1	1	1	1	1	1	0	GCA_007559085.1	Pseudomonas	aeruginosa	strain=A681
GCA_007559105.1	1	1	1	1	1	1	1	1	0	GCA_007559105.1	Pseudomonas	aeruginosa	strain=519119
GCA_007559125.1	1	1	1	1	1	1	1	1	0	GCA_007559125.1	Pseudomonas	aeruginosa	strain=243931
GCA_007833895.1	1	1	1	1	1	1	1	1	0	GCA_007833895.1	Pseudomonas	aeruginosa	strain=C79
GCA_008033725.1	1	1	1	1	1	1	1	1	0	GCA_008033725.1	Pseudomonas	aeruginosa	strain=IMP67
GCA_008033745.1	1	1	1	1	1	1	1	1	0	GCA_008033745.1	Pseudomonas	aeruginosa	strain=IMP68
GCA_008033765.1	1	1	1	1	1	1	1	1	0	GCA_008033765.1	Pseudomonas	aeruginosa	strain=IMP66
GCA_008195485.1	1	1	1	1	1	1	1	1	0	GCA_008195485.1	Pseudomonas	aeruginosa	strain=CCUG	51971
GCA_008245185.1	1	1	1	1	1	1	1	1	0	GCA_008245185.1	Pseudomonas	aeruginosa	strain=HOU1
GCA_008705235.1	1	1	1	1	1	1	1	1	0	GCA_008705235.1	Pseudomonas	aeruginosa	strain=E90
GCA_009497675.1	1	1	1	1	1	1	1	1	0	GCA_009497675.1	Pseudomonas	aeruginosa	strain=PA59
GCA_009648875.1	1	1	1	1	1	1	1	1	0	GCA_009648875.1	Pseudomonas	aeruginosa	strain=CFSAN084950
GCA_009662315.1	1	1	1	1	1	1	1	1	0	GCA_009662315.1	Pseudomonas	aeruginosa	strain=AG1
GCA_009664165.1	1	1	1	1	1	1	1	1	0	GCA_009664165.1	Pseudomonas	aeruginosa	strain=ST773
GCA_009676765.1	0	0	0	0	0	0	0	0	0	GCA_009676765.1	Pseudomonas	aeruginosa	strain=1811-13R031
GCA_009676785.1	0	0	0	0	0	0	0	0	0	GCA_009676785.1	Pseudomonas	aeruginosa	strain=1811-18R001
GCA_009676885.1	1	1	1	1	1	1	1	1	0	GCA_009676885.1	Pseudomonas	aeruginosa	strain=KRP1
GCA_009720405.1	1	1	1	1	1	1	1	1	0	GCA_009720405.1	Pseudomonas	aeruginosa	strain=T2436
GCA_009720425.1	1	1	1	1	1	1	1	1	0	GCA_009720425.1	Pseudomonas	aeruginosa	strain=T2101
GCA_009867055.1	1	1	1	1	1	1	1	1	0	GCA_009867055.1	Pseudomonas	aeruginosa	strain=YB01
GCA_009905195.1	1	1	1	1	1	1	1	1	0	GCA_009905195.1	Pseudomonas	aeruginosa	strain=INP-43
GCA_009911735.1	0	0	0	0	0	0	0	0	0	GCA_009911735.1	Pseudomonas	aeruginosa	strain=RD1-3
GCA_010694505.1	1	0	1	1	1	1	0	1	0	GCA_010694505.1	Pseudomonas	aeruginosa	strain=VIT	PC9
GCA_011045375.1	1	1	1	1	1	1	1	1	0	GCA_011045375.1	Pseudomonas	aeruginosa	strain=MS14403
GCA_011106815.1	1	1	1	1	1	1	1	1	0	GCA_011106815.1	Pseudomonas	aeruginosa	strain=PAG5
GCA_011466835.1	0	0	0	0	0	0	0	0	0	GCA_011466835.1	Pseudomonas	aeruginosa	strain=CF39S
GCA_012276675.1	1	1	1	1	1	1	1	1	0	GCA_012276675.1	Pseudomonas	aeruginosa	strain=CMC-115
GCA_012935295.1	1	1	1	1	1	1	1	1	0	GCA_012935295.1	Pseudomonas	aeruginosa	strain=AA2
GCA_012971705.1	0	0	0	0	0	0	0	0	0	GCA_012971705.1	Pseudomonas	aeruginosa	strain=LYT4
GCA_013201095.1	1	1	1	1	1	1	1	1	0	GCA_013201095.1	Pseudomonas	aeruginosa	strain=PAC6
GCA_013201115.1	1	1	1	1	1	1	1	1	0	GCA_013201115.1	Pseudomonas	aeruginosa	strain=PAC1
GCA_013255565.1	1	1	1	1	1	1	1	1	0	GCA_013255565.1	Pseudomonas	aeruginosa	strain=PSE6684
GCA_013260445.1	0	0	0	0	0	0	0	0	0	GCA_013260445.1	Pseudomonas	aeruginosa	strain=YD001
GCA_013305645.2	1	1	1	1	1	1	1	1	0	GCA_013305645.2	Pseudomonas	aeruginosa	strain=YT12746
GCA_013305765.1	1	1	1	1	1	1	1	1	0	GCA_013305765.1	Pseudomonas	aeruginosa	strain=LIUYANG-E
GCA_013305815.1	0	0	0	0	0	0	0	0	0	GCA_013305815.1	Pseudomonas	aeruginosa	strain=LIUYANG-C
GCA_013305845.1	0	0	0	0	0	0	0	0	0	GCA_013305845.1	Pseudomonas	aeruginosa	strain=LIUYANG-A
GCA_013341295.1	1	1	1	1	1	1	1	1	0	GCA_013341295.1	Pseudomonas	aeruginosa	strain=PAAK088
GCA_013341315.1	1	1	1	1	1	1	1	1	0	GCA_013341315.1	Pseudomonas	aeruginosa	strain=PAAK095
GCA_013343315.1	1	1	1	1	1	1	1	1	0	GCA_013343315.1	Pseudomonas	aeruginosa	strain=DVT729
GCA_013343335.1	1	1	1	1	1	1	1	1	0	GCA_013343335.1	Pseudomonas	aeruginosa	strain=DVT429
GCA_013343355.1	1	1	1	1	1	1	1	1	0	GCA_013343355.1	Pseudomonas	aeruginosa	strain=DVT427
GCA_013343375.1	1	1	1	1	1	1	1	1	0	GCA_013343375.1	Pseudomonas	aeruginosa	strain=DVT425
GCA_013343395.1	1	1	1	1	1	1	1	1	0	GCA_013343395.1	Pseudomonas	aeruginosa	strain=DVT423
GCA_013343415.1	1	1	1	1	1	1	1	1	0	GCA_013343415.1	Pseudomonas	aeruginosa	strain=DVT421
GCA_013343435.1	1	1	1	1	1	1	1	1	0	GCA_013343435.1	Pseudomonas	aeruginosa	strain=DVT419
GCA_013343455.1	1	1	1	1	1	1	1	1	0	GCA_013343455.1	Pseudomonas	aeruginosa	strain=DVT417
GCA_013343475.1	1	1	1	1	1	1	1	1	0	GCA_013343475.1	Pseudomonas	aeruginosa	strain=DVT779
GCA_013343495.1	1	1	1	1	1	1	1	1	0	GCA_013343495.1	Pseudomonas	aeruginosa	strain=DVT414
GCA_013343515.1	1	1	1	1	1	1	1	1	0	GCA_013343515.1	Pseudomonas	aeruginosa	strain=DVT413
GCA_013343535.1	1	1	1	1	1	1	1	1	0	GCA_013343535.1	Pseudomonas	aeruginosa	strain=DVT412
GCA_013343555.1	1	1	1	1	1	1	1	1	0	GCA_013343555.1	Pseudomonas	aeruginosa	strain=DVT410
GCA_013343575.1	1	1	1	1	1	1	1	1	0	GCA_013343575.1	Pseudomonas	aeruginosa	strain=DVT401
GCA_013347245.1	0	0	0	0	0	0	0	0	0	GCA_013347245.1	Pseudomonas	aeruginosa	strain=CDN118
GCA_013376775.1	1	1	1	1	1	1	1	1	0	GCA_013376775.1	Pseudomonas	aeruginosa	strain=CDN129
GCA_013393665.2	1	1	1	1	1	1	1	1	0	GCA_013393665.2	Pseudomonas	aeruginosa	strain=SE5331
GCA_013393685.1	1	1	1	1	1	1	1	1	0	GCA_013393685.1	Pseudomonas	aeruginosa	strain=SE5369
GCA_013393705.1	1	1	1	1	1	1	1	1	0	GCA_013393705.1	Pseudomonas	aeruginosa	strain=SE5416
GCA_013394455.1	1	1	1	1	1	1	1	1	0	GCA_013394455.1	Pseudomonas	aeruginosa	strain=SE5443
GCA_013394475.2	1	1	1	1	1	1	1	1	0	GCA_013394475.2	Pseudomonas	aeruginosa	strain=SE5458
GCA_013395035.1	1	1	1	1	1	1	1	1	0	GCA_013395035.1	Pseudomonas	aeruginosa	strain=B18
GCA_013467585.1	1	1	1	1	1	1	1	1	0	GCA_013467585.1	Pseudomonas	aeruginosa	strain=ACR20
GCA_013467605.1	1	1	1	1	1	1	1	1	0	GCA_013467605.1	Pseudomonas	aeruginosa	strain=ACR22
GCA_014155905.1	1	0	1	1	1	1	1	1	0	GCA_014155905.1	Pseudomonas	aeruginosa	strain=401853
GCA_014217315.1	1	1	1	1	1	1	1	1	0	GCA_014217315.1	Pseudomonas	aeruginosa	strain=JNQH-PA57
GCA_014467035.1	1	1	1	1	1	1	1	1	0	GCA_014467035.1	Pseudomonas	aeruginosa	strain=NRD619
GCA_014490645.1	1	1	1	1	1	1	1	1	0	GCA_014490645.1	Pseudomonas	aeruginosa	strain=PA3
GCA_014672795.1	0	0	0	0	0	0	0	0	0	GCA_014672795.1	Pseudomonas	aeruginosa	strain=ZM03
GCA_014792125.1	1	1	1	1	1	1	1	1	0	GCA_014792125.1	Pseudomonas	aeruginosa	strain=R31
GCA_014854655.1	0	0	0	0	0	0	0	0	0	GCA_014854655.1	Pseudomonas	aeruginosa	strain=JT86
GCA_014930935.1	1	1	1	1	1	1	1	1	0	GCA_014930935.1	Pseudomonas	aeruginosa	strain=KC-Tt-1
GCA_015697465.1	1	1	1	1	1	1	1	1	0	GCA_015697465.1	Pseudomonas	aeruginosa	strain=G-I-1
GCA_015697605.1	1	1	1	1	1	1	1	1	0	GCA_015697605.1	Pseudomonas	aeruginosa	strain=C-I-1
GCA_015697645.1	1	1	1	1	1	1	1	1	0	GCA_015697645.1	Pseudomonas	aeruginosa	strain=B-I-1
GCA_015697665.1	1	1	1	1	1	1	1	1	0	GCA_015697665.1	Pseudomonas	aeruginosa	strain=A-I-1
GCA_015832055.1	1	1	1	1	1	1	1	1	0	GCA_015832055.1	Pseudomonas	aeruginosa
GCA_015832075.1	1	1	1	1	1	1	1	1	0	GCA_015832075.1	Pseudomonas	aeruginosa
GCA_016064595.1	1	1	1	1	1	1	1	1	0	GCA_016064595.1	Pseudomonas	aeruginosa	strain=CMC-097
GCA_016105505.1	1	1	1	1	1	1	1	1	0	GCA_016105505.1	Pseudomonas	aeruginosa	strain=TJ2019-022
GCA_016105665.1	1	1	1	1	1	1	1	1	0	GCA_016105665.1	Pseudomonas	aeruginosa	strain=TJ2019-017
GCA_016105885.1	1	1	1	1	1	1	1	1	0	GCA_016105885.1	Pseudomonas	aeruginosa	strain=TJ2014-049
GCA_016107485.1	1	1	1	1	1	1	1	1	0	GCA_016107485.1	Pseudomonas	aeruginosa	strain=MPAO1
GCA_016126955.1	1	1	1	1	1	1	1	1	0	GCA_016126955.1	Pseudomonas	aeruginosa	strain=FDAARGOS_1041
GCA_016134915.1	1	1	1	1	1	1	1	1	0	GCA_016134915.1	Pseudomonas	aeruginosa	strain=DL201330
GCA_016584725.1	1	1	1	1	1	1	1	1	0	GCA_016584725.1	Pseudomonas	aeruginosa	strain=LYSZa7
GCA_016743035.1	1	1	1	1	1	1	1	1	0	GCA_016743035.1	Pseudomonas	aeruginosa	strain=A39-1
GCA_016743115.1	1	1	1	1	1	1	1	1	0	GCA_016743115.1	Pseudomonas	aeruginosa	strain=PA19-3047
GCA_016745115.1	1	1	1	1	1	1	1	1	0	GCA_016745115.1	Pseudomonas	aeruginosa	strain=YTSEY8
GCA_016745135.1	1	1	1	1	1	1	1	1	0	GCA_016745135.1	Pseudomonas	aeruginosa	strain=SE5352
GCA_016745155.1	1	1	1	1	1	1	1	1	0	GCA_016745155.1	Pseudomonas	aeruginosa	strain=SE5357
GCA_016745175.1	1	1	0	0	0	0	0	0	0	GCA_016745175.1	Pseudomonas	aeruginosa	strain=SE5429
GCA_016745195.1	1	1	1	1	1	1	1	1	0	GCA_016745195.1	Pseudomonas	aeruginosa	strain=1903031130
GCA_016811975.1	1	1	1	1	1	1	1	1	0	GCA_016811975.1	Pseudomonas	aeruginosa	strain=152962
GCA_016864415.1	0	0	0	0	0	0	0	0	0	GCA_016864415.1	Pseudomonas	aeruginosa	strain=PARM801
GCA_016925455.1	1	1	1	1	1	1	1	1	0	GCA_016925455.1	Pseudomonas	aeruginosa	strain=B17416
GCA_016925475.1	1	1	1	1	1	1	1	1	0	GCA_016925475.1	Pseudomonas	aeruginosa	strain=B17932
GCA_017378395.1	1	1	1	1	1	1	1	1	0	GCA_017378395.1	Pseudomonas	aeruginosa	strain=LYSZa5
GCA_017378475.1	1	1	1	1	1	1	1	1	0	GCA_017378475.1	Pseudomonas	aeruginosa	strain=LYSZa2
GCA_017900915.1	1	1	1	1	1	1	1	1	0	GCA_017900915.1	Pseudomonas	aeruginosa	strain=LICME	WGH-6
GCA_018138045.1	0	0	0	0	0	0	0	0	0	GCA_018138045.1	Pseudomonas	aeruginosa	strain=NDTH9845
GCA_018138065.1	0	0	0	0	0	0	0	0	0	GCA_018138065.1	Pseudomonas	aeruginosa	strain=WTJH17
GCA_900070375.1	1	1	1	1	1	1	1	1	0	GCA_900070375.1	Pseudomonas	aeruginosa	strain=PAO1_Orsay
GCA_900091925.1	0	0	0	0	0	0	0	0	0	GCA_900091925.1	Pseudomonas	aeruginosa
GCA_900091935.1	0	0	0	0	0	0	0	0	0	GCA_900091935.1	Pseudomonas	aeruginosa
GCA_900095805.1	1	1	1	1	1	1	1	1	0	GCA_900095805.1	Pseudomonas	aeruginosa
GCA_900149285.1	1	1	1	1	1	1	1	1	0	GCA_900149285.1	Pseudomonas	aeruginosa
GCA_900243355.1	1	1	1	1	1	1	1	1	0	GCA_900243355.1	Pseudomonas	aeruginosa
GCA_900478745.1	1	1	1	1	1	1	1	1	0	GCA_900478745.1	Pseudomonas	aeruginosa	strain=NCTC9433
GCA_900497025.1	1	1	1	1	1	1	1	1	0	GCA_900497025.1	Pseudomonas	aeruginosa
GCA_900618245.1	1	1	1	1	1	1	1	1	0	GCA_900618245.1	Pseudomonas	aeruginosa
GCA_900618255.1	1	1	1	1	1	1	1	1	0	GCA_900618255.1	Pseudomonas	aeruginosa
GCA_900618265.1	1	1	1	1	1	1	1	1	0	GCA_900618265.1	Pseudomonas	aeruginosa
GCA_900618275.1	1	1	1	1	1	1	1	1	0	GCA_900618275.1	Pseudomonas	aeruginosa
GCA_900618285.1	1	1	1	1	1	1	1	1	0	GCA_900618285.1	Pseudomonas	aeruginosa
GCA_900618305.1	1	1	1	1	1	1	1	1	0	GCA_900618305.1	Pseudomonas	aeruginosa
GCA_900618315.1	1	1	1	1	1	1	1	1	0	GCA_900618315.1	Pseudomonas	aeruginosa
GCA_900618325.1	1	1	1	1	1	1	1	1	0	GCA_900618325.1	Pseudomonas	aeruginosa
GCA_900618335.1	1	1	1	1	1	1	1	1	0	GCA_900618335.1	Pseudomonas	aeruginosa
GCA_900636735.1	1	1	1	1	1	1	1	1	0	GCA_900636735.1	Pseudomonas	aeruginosa	strain=NCTC11445
GCA_900636755.1	1	1	1	1	1	1	1	1	0	GCA_900636755.1	Pseudomonas	aeruginosa	strain=NCTC12903
GCA_900636975.1	1	1	1	1	1	1	1	1	0	GCA_900636975.1	Pseudomonas	aeruginosa	strain=NCTC13715
GCA_900637045.1	1	1	1	1	1	1	1	1	0	GCA_900637045.1	Pseudomonas	aeruginosa	strain=NCTC10728
GCA_901472545.1	1	1	1	1	1	1	1	1	0	GCA_901472545.1	Pseudomonas	aeruginosa	strain=NCTC13359
GCA_901472565.1	1	1	1	1	1	1	1	1	0	GCA_901472565.1	Pseudomonas	aeruginosa	strain=NCTC13620
GCA_901472595.1	1	1	1	1	1	1	1	1	0	GCA_901472595.1	Pseudomonas	aeruginosa	strain=NCTC13618
GCA_902703185.1	1	1	1	1	1	1	1	1	0	GCA_902703185.1	Pseudomonas	aeruginosa	strain=PcyII-29
GCA_902703195.1	1	1	1	1	1	1	1	1	0	GCA_902703195.1	Pseudomonas	aeruginosa	strain=PcyII-40
GCA_902703215.1	1	1	1	1	1	1	1	1	0	GCA_902703215.1	Pseudomonas	aeruginosa	strain=C7-25
GCA_904866275.1	0	0	0	0	0	0	0	0	0	GCA_904866275.1	Pseudomonas	aeruginosa
GCA_905071885.1	0	0	0	0	0	0	0	0	0	GCA_905071885.1	Pseudomonas	aeruginosa
GCA_002374815.1	0	0	0	0	0	0	0	0	0	GCA_002374815.1	Pseudoalteromonas	atlantica	strain=ECSMB14104
GCA_000755805.1	1	1	1	1	1	1	1	1	0	GCA_000755805.1	Burkholderia	cepacia	strain=DDS	7H-2
GCA_000974835.2	1	0	1	1	1	1	1	1	0	GCA_000974835.2	Burkholderia	cepacia	strain=LO6
GCA_001718395.1	1	1	1	1	1	1	1	1	0	GCA_001718395.1	Burkholderia	cepacia	strain=INT3-BP177
GCA_001718835.1	1	1	1	1	1	1	1	1	0	GCA_001718835.1	Burkholderia	cepacia	strain=MSMB1184WGS
GCA_002209085.2	1	1	1	1	1	1	1	1	0	GCA_002209085.2	Burkholderia	cepacia	strain=FDAARGOS_345
GCA_002407525.3	1	1	1	1	1	1	1	1	0	GCA_002407525.3	Burkholderia	cepacia	strain=FDAARGOS_388
GCA_009586235.1	1	1	1	1	1	1	1	1	0	GCA_009586235.1	Burkholderia	cepacia	strain=BC16
GCA_014854795.1	1	1	1	1	1	1	1	1	0	GCA_014854795.1	Burkholderia	cepacia	strain=39628
GCA_904865725.1	0	0	0	0	0	0	0	0	0	GCA_904865725.1	Burkholderia	cepacia
GCA_004102925.1	1	1	1	1	1	1	1	1	0	GCA_004102925.1	Brevundimonas	diminuta	strain=ATCC(B)	19146
GCA_016127655.1	1	0	1	1	1	1	1	1	0	GCA_016127655.1	Brevundimonas	diminuta	strain=FDAARGOS_1026
GCA_000730425.1	1	1	1	1	1	1	1	1	0	GCA_000730425.1	Pseudomonas	fluorescens	strain=UK4
GCA_001307155.1	1	0	1	1	1	1	1	1	0	GCA_001307155.1	Pseudomonas	fluorescens	strain=FW300-N2E3
GCA_001307275.1	1	1	1	1	1	1	1	1	0	GCA_001307275.1	Pseudomonas	fluorescens	strain=FW300-N2C3
GCA_001708445.1	1	1	1	1	1	1	1	1	0	GCA_001708445.1	Pseudomonas	fluorescens	strain=L321
GCA_001708465.1	1	1	1	1	1	1	1	1	0	GCA_001708465.1	Pseudomonas	fluorescens	strain=L111
GCA_001747385.1	1	1	1	1	1	1	1	1	0	GCA_001747385.1	Pseudomonas	fluorescens	strain=Pt14
GCA_002865505.1	1	1	1	1	1	1	1	1	0	GCA_002865505.1	Pseudomonas	fluorescens	strain=2P24
GCA_003055645.1	1	1	1	1	1	1	1	1	0	GCA_003055645.1	Pseudomonas	fluorescens	strain=MS82
GCA_003410335.1	1	1	1	1	1	1	1	1	0	GCA_003410335.1	Pseudomonas	fluorescens	strain=Pf275
GCA_003612935.1	1	1	1	1	1	1	1	1	0	GCA_003612935.1	Pseudomonas	fluorescens	strain=SIK_W1
GCA_003626995.1	1	1	1	1	1	1	1	1	0	GCA_003626995.1	Pseudomonas	fluorescens	strain=PF08
GCA_004683905.1	1	1	1	1	1	1	1	1	0	GCA_004683905.1	Pseudomonas	fluorescens	strain=LBUM677
GCA_010448615.1	1	1	1	1	1	1	1	1	0	GCA_010448615.1	Pseudomonas	fluorescens	strain=DR397
GCA_010668965.1	1	0	1	1	1	1	1	1	0	GCA_010668965.1	Pseudomonas	fluorescens	strain=DR133
GCA_012974785.1	1	1	1	1	1	1	1	1	0	GCA_012974785.1	Pseudomonas	fluorescens	strain=G7
GCA_013401475.1	0	0	0	0	0	0	0	0	0	GCA_013401475.1	Pseudomonas	fluorescens	strain=W-6
GCA_015074865.1	1	1	1	1	1	1	1	1	0	GCA_015074865.1	Pseudomonas	fluorescens	strain=KF1
GCA_016728065.1	1	1	1	1	1	1	1	1	0	GCA_016728065.1	Pseudomonas	fluorescens	strain=FDAARGOS_1088
GCA_017498465.1	1	1	1	1	1	1	1	1	0	GCA_017498465.1	Pseudomonas	fluorescens	strain=YK-310
GCA_017948385.1	1	1	1	1	1	1	1	1	0	GCA_017948385.1	Pseudomonas	fluorescens	strain=JNU01
GCA_900475215.1	1	1	1	1	1	1	1	1	0	GCA_900475215.1	Pseudomonas	fluorescens	strain=NCTC10038
GCA_900636635.1	1	1	1	1	1	1	1	1	0	GCA_900636635.1	Pseudomonas	fluorescens	strain=NCTC10783
GCA_900636825.1	1	1	1	1	1	1	1	1	0	GCA_900636825.1	Pseudomonas	fluorescens	strain=NCTC9428
GCA_902825215.1	1	0	1	1	1	1	1	1	0	GCA_902825215.1	Pseudomonas	fluorescens
GCA_001543265.1	1	1	1	1	1	1	1	1	0	GCA_001543265.1	Pseudomonas	fragi	strain=P121
GCA_002128325.1	1	1	1	1	1	1	1	1	0	GCA_002128325.1	Pseudomonas	fragi	strain=NMC25
GCA_015476275.1	1	1	1	1	1	1	1	1	0	GCA_015476275.1	Pseudomonas	fragi	strain=NL20W
GCA_015767515.1	1	1	1	1	1	1	1	1	0	GCA_015767515.1	Pseudomonas	fragi	strain=A13BB
GCA_003574215.1	1	0	1	1	1	1	1	1	0	GCA_003574215.1	Hydrogenophilus	thermoluteolus	strain=TH-1
GCA_002155165.1	1	1	1	1	1	1	1	1	0	GCA_002155165.1	Pseudomonas	mendocina	strain=NSYSU
GCA_002442555.1	1	1	1	1	1	1	1	1	0	GCA_002442555.1	Pseudomonas	mendocina	strain=MAE1-K
GCA_003008615.1	1	1	1	1	1	1	1	1	0	GCA_003008615.1	Pseudomonas	mendocina	strain=NEB698
GCA_017798225.1	1	1	1	1	1	1	1	1	0	GCA_017798225.1	Pseudomonas	mendocina	strain=CPS5
GCA_900636545.1	1	0	1	1	1	1	1	1	0	GCA_900636545.1	Pseudomonas	mendocina	strain=NCTC10897
GCA_000953455.1	1	0	1	1	1	1	1	1	0	GCA_000953455.1	Pseudomonas	oleovorans
GCA_900626055.2	1	1	1	1	1	1	1	1	0	GCA_900626055.2	Pseudomonas	oleovorans	strain=T9AD
GCA_000691565.1	1	1	1	1	1	1	1	1	0	GCA_000691565.1	Pseudomonas	putida	strain=DLL-E4
GCA_001515585.2	1	0	1	1	1	1	1	1	0	GCA_001515585.2	Pseudomonas	putida	strain=1A00316
GCA_001630725.2	1	1	1	1	1	1	1	1	0	GCA_001630725.2	Pseudomonas	putida	strain=JQ581
GCA_001636055.1	1	1	1	1	1	1	1	1	0	GCA_001636055.1	Pseudomonas	putida	strain=PC2
GCA_001886975.1	1	1	1	1	1	1	1	1	0	GCA_001886975.1	Pseudomonas	putida	strain=PP112420
GCA_002025705.1	0	0	0	0	0	0	0	0	0	GCA_002025705.1	Pseudomonas	putida	strain=AA7
GCA_002356095.1	1	1	1	1	1	1	1	1	0	GCA_002356095.1	Pseudomonas	putida	strain=KF715
GCA_002736045.1	1	1	1	1	1	1	1	1	0	GCA_002736045.1	Pseudomonas	putida	strain=E46
GCA_002736125.1	1	1	1	1	1	1	1	1	0	GCA_002736125.1	Pseudomonas	putida	strain=E41
GCA_002741075.1	1	1	1	1	1	1	1	1	0	GCA_002741075.1	Pseudomonas	putida	strain=IEC33019
GCA_003228315.1	1	1	1	1	1	1	1	1	0	GCA_003228315.1	Pseudomonas	putida	strain=JBC17
GCA_003290365.1	1	1	1	1	1	1	1	1	0	GCA_003290365.1	Pseudomonas	putida	strain=NX-1
GCA_003671955.1	1	1	1	1	1	1	1	1	0	GCA_003671955.1	Pseudomonas	putida	strain=B4
GCA_005080685.1	1	0	1	1	1	1	1	1	0	GCA_005080685.1	Pseudomonas	putida	strain=1290
GCA_007833495.1	1	1	1	1	1	1	1	1	0	GCA_007833495.1	Pseudomonas	putida	strain=B1
GCA_008605605.1	1	1	1	1	1	1	1	1	0	GCA_008605605.1	Pseudomonas	putida	strain=JYR-1
GCA_009883635.2	1	0	1	1	1	1	1	1	0	GCA_009883635.2	Pseudomonas	putida	strain=W5
GCA_009938035.1	1	1	1	1	1	1	1	1	0	GCA_009938035.1	Pseudomonas	putida	strain=TS312
GCA_013305625.1	1	1	1	1	1	1	1	1	0	GCA_013305625.1	Pseudomonas	putida	strain=15420352
GCA_013425825.1	1	1	1	1	1	1	1	1	0	GCA_013425825.1	Pseudomonas	putida	strain=BS3701
GCA_014076515.1	0	0	0	0	0	0	0	0	0	GCA_014076515.1	Pseudomonas	putida	strain=T25-27
GCA_014162535.1	1	1	1	1	1	1	1	1	0	GCA_014162535.1	Pseudomonas	putida	strain=WP8-W18-CRE-01
GCA_014169055.1	1	1	1	1	1	1	1	1	0	GCA_014169055.1	Pseudomonas	putida	strain=WP4-W18-CRE-03
GCA_014217705.1	1	1	1	1	1	1	1	1	0	GCA_014217705.1	Pseudomonas	putida	strain=MX-2
GCA_014764425.1	1	1	1	1	1	1	1	1	0	GCA_014764425.1	Pseudomonas	putida	strain=ZXPA-20
GCA_014854555.1	1	0	1	1	1	1	1	1	0	GCA_014854555.1	Pseudomonas	putida	strain=SY153
GCA_015168335.1	0	0	0	0	0	0	0	0	0	GCA_015168335.1	Pseudomonas	putida	strain=SWMUB4
GCA_016406145.1	1	1	1	1	1	1	1	1	0	GCA_016406145.1	Pseudomonas	putida	strain=BR-PH17
GCA_016845885.1	1	1	1	1	1	1	1	1	0	GCA_016845885.1	Pseudomonas	putida	strain=R51
GCA_900636645.1	1	1	1	1	1	1	1	1	0	GCA_900636645.1	Pseudomonas	putida	strain=NCTC13186
GCA_001267515.1	1	1	1	1	1	1	1	1	0	GCA_001267515.1	Ralstonia	solanacearum	strain=YC45
GCA_001299555.1	1	1	1	1	1	1	1	1	0	GCA_001299555.1	Ralstonia	solanacearum	strain=UY031
GCA_001586135.1	1	1	1	1	1	1	1	1	0	GCA_001586135.1	Ralstonia	solanacearum	strain=KACC	10722
GCA_001587135.1	1	1	1	1	1	1	1	1	0	GCA_001587135.1	Ralstonia	solanacearum	strain=UW163
GCA_001587155.1	1	1	1	1	1	1	1	1	0	GCA_001587155.1	Ralstonia	solanacearum	strain=IBSBF1503
GCA_001663415.1	1	1	1	1	1	1	1	1	0	GCA_001663415.1	Ralstonia	solanacearum	strain=YC40-M
GCA_001708525.1	1	1	1	1	1	1	1	1	0	GCA_001708525.1	Ralstonia	solanacearum	strain=KACC10709
GCA_001891105.1	1	1	1	1	1	1	1	1	0	GCA_001891105.1	Ralstonia	solanacearum	strain=EP1
GCA_002162015.1	1	1	1	1	1	1	1	1	0	GCA_002162015.1	Ralstonia	solanacearum	strain=SEPPX05
GCA_002220465.1	1	1	1	1	1	1	1	1	0	GCA_002220465.1	Ralstonia	solanacearum	strain=CQPS-1
GCA_002501565.1	1	1	1	1	1	1	1	1	0	GCA_002501565.1	Ralstonia	solanacearum	strain=RS	488
GCA_002549815.1	1	0	1	1	1	1	1	1	0	GCA_002549815.1	Ralstonia	solanacearum	strain=RS	489
GCA_002894285.1	1	1	1	1	1	1	1	1	0	GCA_002894285.1	Ralstonia	solanacearum	strain=RSCM
GCA_003515145.1	1	1	1	1	1	1	1	1	0	GCA_003515145.1	Ralstonia	solanacearum	strain=T51
GCA_003515165.1	1	1	1	1	1	1	1	1	0	GCA_003515165.1	Ralstonia	solanacearum	strain=T11
GCA_003515185.1	1	1	1	1	1	1	1	1	0	GCA_003515185.1	Ralstonia	solanacearum	strain=SL3175
GCA_003515205.1	1	1	1	1	1	1	1	1	0	GCA_003515205.1	Ralstonia	solanacearum	strain=SL3103
GCA_003515225.1	1	1	1	1	1	1	1	1	0	GCA_003515225.1	Ralstonia	solanacearum	strain=SL2330
GCA_003515245.1	1	1	1	1	1	1	1	1	0	GCA_003515245.1	Ralstonia	solanacearum	strain=T117
GCA_003515265.1	1	1	1	1	1	1	1	1	0	GCA_003515265.1	Ralstonia	solanacearum	strain=T98
GCA_003515285.1	1	1	1	1	1	1	1	1	0	GCA_003515285.1	Ralstonia	solanacearum	strain=T78
GCA_003515305.1	1	1	1	1	1	1	1	1	0	GCA_003515305.1	Ralstonia	solanacearum	strain=T25
GCA_003515325.1	1	1	1	1	1	1	1	1	0	GCA_003515325.1	Ralstonia	solanacearum	strain=T12
GCA_003515345.1	1	1	1	1	1	1	1	1	0	GCA_003515345.1	Ralstonia	solanacearum	strain=SL3755
GCA_003515365.1	1	1	1	1	1	1	1	1	0	GCA_003515365.1	Ralstonia	solanacearum	strain=SL3730
GCA_003515385.1	1	1	1	1	1	1	1	1	0	GCA_003515385.1	Ralstonia	solanacearum	strain=SL3022
GCA_003515405.1	1	1	1	1	1	1	1	1	0	GCA_003515405.1	Ralstonia	solanacearum	strain=SL2729
GCA_003515425.1	1	1	1	1	1	1	1	1	0	GCA_003515425.1	Ralstonia	solanacearum	strain=SL2312
GCA_003515445.1	1	1	1	1	1	1	1	1	0	GCA_003515445.1	Ralstonia	solanacearum	strain=SL2064
GCA_003515465.1	1	1	1	1	1	1	0	0	0	GCA_003515465.1	Ralstonia	solanacearum	strain=T110
GCA_003515485.1	1	1	1	1	1	1	1	1	0	GCA_003515485.1	Ralstonia	solanacearum	strain=T101
GCA_003515505.1	1	1	1	1	1	1	1	1	0	GCA_003515505.1	Ralstonia	solanacearum	strain=T95
GCA_003515525.1	1	1	1	1	1	1	1	1	0	GCA_003515525.1	Ralstonia	solanacearum	strain=T82
GCA_003515545.1	1	1	1	1	1	1	1	1	0	GCA_003515545.1	Ralstonia	solanacearum	strain=T60
GCA_003515565.1	1	1	1	1	1	1	1	1	0	GCA_003515565.1	Ralstonia	solanacearum	strain=T42
GCA_003515585.1	1	1	1	1	1	1	1	1	0	GCA_003515585.1	Ralstonia	solanacearum	strain=SL3882
GCA_003515605.1	1	1	1	1	1	1	1	1	0	GCA_003515605.1	Ralstonia	solanacearum	strain=SL3822
GCA_003515625.1	1	1	1	1	1	1	1	1	0	GCA_003515625.1	Ralstonia	solanacearum	strain=SL3300
GCA_003590605.1	1	1	1	1	1	1	1	1	0	GCA_003590605.1	Ralstonia	solanacearum	strain=IBSBF	2571
GCA_003999715.1	1	1	1	1	1	1	1	1	0	GCA_003999715.1	Ralstonia	solanacearum	strain=HA4-1
GCA_006088755.1	1	1	1	1	1	1	1	1	0	GCA_006088755.1	Ralstonia	solanacearum	strain=UW386
GCA_009832785.1	1	1	1	1	1	1	1	1	0	GCA_009832785.1	Ralstonia	solanacearum	strain=CFBP	8697
GCA_009832805.1	1	1	1	1	1	1	1	1	0	GCA_009832805.1	Ralstonia	solanacearum	strain=CFBP	8695
GCA_011290405.1	1	1	1	1	1	1	1	1	0	GCA_011290405.1	Ralstonia	solanacearum	strain=B2
GCA_011290425.1	1	1	1	1	1	1	1	1	0	GCA_011290425.1	Ralstonia	solanacearum	strain=204
GCA_011290445.1	1	1	1	1	1	1	1	1	0	GCA_011290445.1	Ralstonia	solanacearum	strain=203
GCA_011290465.1	1	1	1	1	1	1	1	1	0	GCA_011290465.1	Ralstonia	solanacearum	strain=202
GCA_012562465.1	1	1	1	1	1	1	1	1	0	GCA_012562465.1	Ralstonia	solanacearum	strain=CIAT_078
GCA_013306015.1	0	0	0	0	0	0	0	0	0	GCA_013306015.1	Ralstonia	solanacearum	strain=FJAT91.F50
GCA_013306095.1	0	0	0	0	0	0	0	0	0	GCA_013306095.1	Ralstonia	solanacearum	strain=FJAT454.F1
GCA_013306155.1	0	0	0	0	0	0	0	0	0	GCA_013306155.1	Ralstonia	solanacearum	strain=FJAT448.F50
GCA_013306205.1	0	0	0	0	0	0	0	0	0	GCA_013306205.1	Ralstonia	solanacearum	strain=FJAT448.F1
GCA_013306235.1	0	0	0	0	0	0	0	0	0	GCA_013306235.1	Ralstonia	solanacearum	strain=FJAT445.F50
GCA_013306255.1	0	0	0	0	0	0	0	0	0	GCA_013306255.1	Ralstonia	solanacearum	strain=FJAT445.F1
GCA_013306275.1	0	0	0	0	0	0	0	0	0	GCA_013306275.1	Ralstonia	solanacearum	strain=FJAT442.F50
GCA_013306295.1	1	1	1	1	1	1	1	1	0	GCA_013306295.1	Ralstonia	solanacearum	strain=FJAT442.F1
GCA_013306315.1	0	0	0	0	0	0	0	0	0	GCA_013306315.1	Ralstonia	solanacearum	strain=FJAT15353.F8
GCA_013306335.1	1	1	1	1	1	1	1	1	0	GCA_013306335.1	Ralstonia	solanacearum	strain=FJAT15353.F50
GCA_013306355.1	0	0	0	0	0	0	0	0	0	GCA_013306355.1	Ralstonia	solanacearum	strain=FJAT15353.F1
GCA_013306375.1	0	0	0	0	0	0	0	0	0	GCA_013306375.1	Ralstonia	solanacearum	strain=FJAT15340.F50
GCA_013306395.1	1	1	1	1	1	1	1	1	0	GCA_013306395.1	Ralstonia	solanacearum	strain=FJAT15340.F6
GCA_013306415.1	0	0	0	0	0	0	0	0	0	GCA_013306415.1	Ralstonia	solanacearum	strain=FJAT15340.F1
GCA_013306435.1	0	0	0	0	0	0	0	0	0	GCA_013306435.1	Ralstonia	solanacearum	strain=FJAT15304.F6
GCA_013306455.1	0	0	0	0	0	0	0	0	0	GCA_013306455.1	Ralstonia	solanacearum	strain=FJAT15304.F1
GCA_013306475.1	1	1	1	1	1	1	1	1	0	GCA_013306475.1	Ralstonia	solanacearum	strain=FJAT15304.F50
GCA_013306495.1	1	1	1	1	1	1	1	1	0	GCA_013306495.1	Ralstonia	solanacearum	strain=FJAT15252.F50
GCA_013306515.1	1	1	1	1	1	1	1	1	0	GCA_013306515.1	Ralstonia	solanacearum	strain=FJAT15252.F1
GCA_013306545.1	1	1	1	1	1	1	1	1	0	GCA_013306545.1	Ralstonia	solanacearum	strain=FJAT15249.F50
GCA_013306575.1	1	1	1	1	1	1	1	1	0	GCA_013306575.1	Ralstonia	solanacearum	strain=FJAT15249.F1
GCA_013306655.1	1	1	1	1	1	1	1	1	0	GCA_013306655.1	Ralstonia	solanacearum	strain=FJAT15244.F50
GCA_013306745.1	1	1	1	1	1	1	1	1	0	GCA_013306745.1	Ralstonia	solanacearum	strain=FJAT15244.F1
GCA_013306765.1	1	1	1	1	1	1	1	1	0	GCA_013306765.1	Ralstonia	solanacearum	strain=FJAT1463.F50
GCA_013306785.1	1	1	1	1	1	1	1	1	0	GCA_013306785.1	Ralstonia	solanacearum	strain=FJAT1458.F50
GCA_013306805.1	1	1	1	1	1	1	1	1	0	GCA_013306805.1	Ralstonia	solanacearum	strain=FJAT1463.F1
GCA_013306825.1	1	1	1	1	1	1	1	1	0	GCA_013306825.1	Ralstonia	solanacearum	strain=FJAT1458.F1
GCA_013306845.1	1	1	1	1	1	1	1	1	0	GCA_013306845.1	Ralstonia	solanacearum	strain=FJAT1452.F50
GCA_013306875.1	1	1	1	1	1	1	1	1	0	GCA_013306875.1	Ralstonia	solanacearum	strain=FJAT1452.F1
GCA_013306915.1	1	1	1	1	1	1	1	1	0	GCA_013306915.1	Ralstonia	solanacearum	strain=FJAT1303.F8
GCA_013306935.1	1	1	1	1	1	1	1	1	0	GCA_013306935.1	Ralstonia	solanacearum	strain=FJAT1303.F50
GCA_013306955.1	1	1	1	1	1	1	1	1	0	GCA_013306955.1	Ralstonia	solanacearum	strain=FJAT1303.F1
GCA_013375715.1	1	1	1	1	1	1	1	1	0	GCA_013375715.1	Ralstonia	solanacearum	strain=FJAT91-F1
GCA_013375735.1	1	1	1	1	1	1	1	1	0	GCA_013375735.1	Ralstonia	solanacearum	strain=FJAT91-F8
GCA_013704765.1	1	1	1	1	1	1	1	1	0	GCA_013704765.1	Ralstonia	solanacearum	strain=FJAT15244-F8
GCA_014041975.1	1	1	1	1	1	1	1	1	0	GCA_014041975.1	Ralstonia	solanacearum	strain=YQ
GCA_014490805.1	0	0	0	0	0	0	0	0	0	GCA_014490805.1	Ralstonia	solanacearum	strain=FJAT454.F50-1
GCA_014884685.1	1	1	1	1	1	1	1	1	0	GCA_014884685.1	Ralstonia	solanacearum	strain=RUN2474
GCA_014884705.1	1	1	1	1	1	1	1	1	0	GCA_014884705.1	Ralstonia	solanacearum	strain=RUN2279
GCA_014884725.1	1	1	1	1	1	1	1	1	0	GCA_014884725.1	Ralstonia	solanacearum	strain=UW763
GCA_014884745.1	1	1	1	1	1	1	1	1	0	GCA_014884745.1	Ralstonia	solanacearum	strain=Rs5
GCA_015097935.1	1	1	1	1	1	1	1	1	0	GCA_015097935.1	Ralstonia	solanacearum	strain=MAFF	211471
GCA_015098135.1	1	1	1	1	1	1	1	1	0	GCA_015098135.1	Ralstonia	solanacearum	strain=MAFF	211479
GCA_015098255.1	1	1	1	1	1	1	1	1	0	GCA_015098255.1	Ralstonia	solanacearum	strain=MAFF	211491
GCA_015098475.1	1	1	1	1	1	1	1	1	0	GCA_015098475.1	Ralstonia	solanacearum	strain=MAFF	301560
GCA_015098595.1	1	1	1	1	1	1	1	1	0	GCA_015098595.1	Ralstonia	solanacearum	strain=MAFF	241647
GCA_015098755.1	1	1	1	1	1	1	1	1	0	GCA_015098755.1	Ralstonia	solanacearum	strain=MAFF	241648
GCA_015698345.1	1	1	1	1	1	1	1	1	0	GCA_015698345.1	Ralstonia	solanacearum	strain=MAFF	211472
GCA_015698365.1	1	1	1	1	1	1	1	1	0	GCA_015698365.1	Ralstonia	solanacearum	strain=MAFF	211479
GCA_015698385.1	1	1	1	1	1	1	1	1	0	GCA_015698385.1	Ralstonia	solanacearum	strain=MAFF	311693
GCA_015999365.1	0	0	0	0	0	0	0	0	0	GCA_015999365.1	Ralstonia	solanacearum	strain=362200
GCA_000219605.1	1	1	1	1	1	1	1	1	0	GCA_000219605.1	Pseudomonas	stutzeri	strain=CGMCC	1.1803
GCA_000590475.1	1	1	1	1	1	1	1	1	0	GCA_000590475.1	Pseudomonas	stutzeri	strain=28a24
GCA_000661915.1	1	1	1	1	1	1	1	1	0	GCA_000661915.1	Pseudomonas	stutzeri	strain=19SMN4
GCA_001038645.1	1	0	1	1	1	1	1	1	0	GCA_001038645.1	Pseudomonas	stutzeri	strain=SLG510A3-8
GCA_001648195.1	1	0	1	1	1	1	1	1	0	GCA_001648195.1	Pseudomonas	stutzeri	strain=273
GCA_003001655.1	1	0	1	1	1	1	1	1	0	GCA_003001655.1	Pseudomonas	stutzeri	strain=DW2-1
GCA_003008495.1	1	0	1	1	1	1	1	1	0	GCA_003008495.1	Pseudomonas	stutzeri	strain=1W1-1A
GCA_003047145.2	1	1	1	1	1	1	1	1	0	GCA_003047145.2	Pseudomonas	stutzeri	strain=SGAir0442
GCA_003952645.1	1	1	1	1	1	1	1	1	0	GCA_003952645.1	Pseudomonas	stutzeri	strain=KGS-2
GCA_003952685.1	1	1	1	1	1	1	1	1	0	GCA_003952685.1	Pseudomonas	stutzeri	strain=KGS-8
GCA_005844005.1	1	1	1	1	1	1	1	1	0	GCA_005844005.1	Pseudomonas	stutzeri	strain=PheN2
GCA_009740185.1	1	1	1	1	1	1	1	1	0	GCA_009740185.1	Pseudomonas	stutzeri	strain=XL272
GCA_009789555.1	1	1	1	1	1	1	1	1	0	GCA_009789555.1	Pseudomonas	stutzeri	strain=PM101005
GCA_015291885.1	1	1	1	1	1	1	1	1	0	GCA_015291885.1	Pseudomonas	stutzeri	strain=ATCC	14405
GCA_015680045.1	1	0	1	1	1	1	1	1	0	GCA_015680045.1	Pseudomonas	stutzeri	strain=ZDHY95
GCA_016028515.1	1	1	1	0	1	1	1	1	0	GCA_016028515.1	Pseudomonas	stutzeri	strain=FDAARGOS_877
GCA_016028635.1	1	1	1	0	1	1	1	1	0	GCA_016028635.1	Pseudomonas	stutzeri	strain=FDAARGOS_876
GCA_016028655.1	1	1	1	1	1	1	1	1	0	GCA_016028655.1	Pseudomonas	stutzeri	strain=FDAARGOS_875
GCA_016127795.1	1	1	1	0	1	1	1	1	0	GCA_016127795.1	Pseudomonas	stutzeri	strain=FDAARGOS_1065
GCA_017577085.1	1	1	1	0	1	1	1	1	0	GCA_017577085.1	Pseudomonas	stutzeri
GCA_018138085.1	0	0	0	0	0	0	0	0	0	GCA_018138085.1	Pseudomonas	stutzeri	strain=F2
GCA_900636845.1	1	1	1	1	1	1	1	1	0	GCA_900636845.1	Pseudomonas	stutzeri	strain=NCTC10450
GCA_900638035.1	1	0	1	1	1	1	1	1	0	GCA_900638035.1	Pseudomonas	stutzeri	strain=NCTC10475
GCA_004006335.1	1	1	1	1	1	1	1	1	0	GCA_004006335.1	Pseudomonas	syringae
GCA_014524645.1	1	1	1	1	1	1	1	1	0	GCA_014524645.1	Pseudomonas	syringae	strain=CAS02
GCA_016694755.2	1	1	0	0	1	1	1	1	0	GCA_016694755.2	Pseudomonas	syringae	strain=BIM	B-268
GCA_900235815.1	1	1	1	1	1	1	1	1	0	GCA_900235815.1	Pseudomonas	syringae
GCA_900289125.1	1	1	1	1	1	1	1	1	0	GCA_900289125.1	Pseudomonas	syringae	strain=CFBP	2116
GCA_002905815.2	1	1	1	1	1	1	1	1	0	GCA_002905815.2	Pseudomonas	syringae	pv.	syringae	strain=Pss9097
GCA_900235825.1	1	1	1	1	1	1	1	1	0	GCA_900235825.1	Pseudomonas	syringae	pv.	syringae
GCA_900235865.1	1	1	1	1	1	1	1	1	0	GCA_900235865.1	Pseudomonas	syringae	pv.	syringae
GCA_002966555.1	1	1	1	1	1	1	1	1	0	GCA_002966555.1	Pseudomonas	syringae	pv.	tomato	strain=B13-200
GCA_009800225.1	0	0	0	0	0	0	0	0	0	GCA_009800225.1	Pseudomonas	syringae	pv.	tomato	strain=delta
GCA_002393485.1	1	0	1	1	1	1	1	1	0	GCA_002393485.1	Ralstonia	pickettii	strain=FDAARGOS_410
GCA_003945765.1	1	1	1	1	1	1	1	1	0	GCA_003945765.1	Pseudomonas	chlororaphis	subsp.	chlororaphis	strain=DSM
GCA_009578005.1	1	1	1	1	1	1	1	1	0	GCA_009578005.1	Burkholderia	glumae	strain=GX
GCA_009931375.1	1	1	1	1	1	1	1	1	0	GCA_009931375.1	Burkholderia	glumae	strain=257sh-1
GCA_012974245.1	1	1	1	1	1	1	1	1	0	GCA_012974245.1	Burkholderia	glumae	strain=HN1
GCA_013122645.1	1	0	1	1	1	1	1	1	0	GCA_013122645.1	Burkholderia	glumae	strain=HN
GCA_013307145.1	1	1	1	1	1	1	1	1	0	GCA_013307145.1	Burkholderia	glumae	strain=411gr-6
GCA_013307165.1	1	1	1	1	1	1	1	1	0	GCA_013307165.1	Burkholderia	glumae	strain=336gr-1
GCA_016026055.1	1	1	1	1	1	1	1	1	0	GCA_016026055.1	Burkholderia	glumae	strain=FDAARGOS_949
GCA_016598875.1	1	1	1	1	1	1	1	1	0	GCA_016598875.1	Burkholderia	glumae	strain=FDAARGOS_921
GCA_017858835.1	1	1	1	1	1	1	1	1	0	GCA_017858835.1	Burkholderia	glumae	strain=957856-41-c
GCA_014841015.1	1	1	1	1	1	1	1	1	0	GCA_014841015.1	Xanthomonas	campestris	strain=M28
GCA_000070605.1	1	1	1	1	1	1	1	1	0	GCA_000070605.1	Xanthomonas	campestris	pv.	campestris	strain=B100
GCA_001186415.1	1	1	1	1	1	1	1	1	0	GCA_001186415.1	Xanthomonas	campestris	pv.	campestris	strain=ICMP
GCA_001186465.1	1	1	1	1	1	1	1	1	0	GCA_001186465.1	Xanthomonas	campestris	pv.	campestris	strain=ICMP
GCA_002879955.1	0	0	0	0	0	0	0	0	0	GCA_002879955.1	Xanthomonas	campestris	pv.	campestris	strain=3811
GCA_009177325.1	1	1	1	1	1	1	1	1	0	GCA_009177325.1	Xanthomonas	campestris	pv.	campestris	strain=MAFF106712
GCA_009177345.1	1	1	1	1	1	1	1	1	0	GCA_009177345.1	Xanthomonas	campestris	pv.	campestris	strain=MAFF302021
GCA_015243835.1	1	1	1	1	1	1	1	1	0	GCA_015243835.1	Xanthomonas	citri	strain=UnB-Xtec2D
GCA_016495605.1	1	1	1	1	1	1	1	1	0	GCA_016495605.1	Xanthomonas	citri	strain=UnB-XtecTG02-2
GCA_000212755.3	1	1	1	1	1	1	1	1	0	GCA_000212755.3	Xanthomonas	oryzae	strain=X11-5A
GCA_001276975.2	1	1	1	1	1	1	1	1	0	GCA_001276975.2	Xanthomonas	oryzae	strain=NCPPB	4346
GCA_004319445.1	1	1	1	1	1	1	1	1	0	GCA_004319445.1	Xanthomonas	oryzae	strain=NJ611
GCA_004319465.1	1	1	1	1	1	1	1	1	0	GCA_004319465.1	Xanthomonas	oryzae	strain=BB156-2
GCA_004319485.1	1	1	1	1	1	1	1	1	0	GCA_004319485.1	Xanthomonas	oryzae	strain=BB151-3
GCA_004319505.1	1	1	1	1	1	1	1	1	0	GCA_004319505.1	Xanthomonas	oryzae	strain=BAI23
GCA_002220155.1	1	1	1	1	1	1	1	1	0	GCA_002220155.1	Azotobacter	chroococcum	strain=B3
GCA_016406165.1	1	1	1	1	1	1	1	1	0	GCA_016406165.1	Azotobacter	chroococcum	strain=HR1
GCA_001551895.1	1	0	1	1	1	1	1	1	0	GCA_001551895.1	Agrobacterium	tumefaciens	strain=S33
GCA_002591665.3	1	1	1	1	1	1	1	1	0	GCA_002591665.3	Agrobacterium	tumefaciens	strain=186
GCA_002943835.1	1	0	1	1	1	1	1	1	0	GCA_002943835.1	Agrobacterium	tumefaciens	strain=1D1609
GCA_003666425.1	1	1	1	1	1	1	1	1	0	GCA_003666425.1	Agrobacterium	tumefaciens	strain=1D1108
GCA_003666445.1	1	0	1	1	1	1	1	1	0	GCA_003666445.1	Agrobacterium	tumefaciens	strain=1D1460
GCA_003666465.1	1	1	1	1	1	1	1	1	0	GCA_003666465.1	Agrobacterium	tumefaciens	strain=15955
GCA_003667905.1	1	0	1	1	1	1	1	1	0	GCA_003667905.1	Agrobacterium	tumefaciens	strain=12D1
GCA_003667925.1	1	1	1	1	1	1	1	1	0	GCA_003667925.1	Agrobacterium	tumefaciens	strain=A6
GCA_005221325.1	1	1	1	1	1	1	1	1	0	GCA_005221325.1	Agrobacterium	tumefaciens	strain=CFBP5499
GCA_005221345.1	1	1	1	1	1	1	1	1	0	GCA_005221345.1	Agrobacterium	tumefaciens	strain=CFBP5877
GCA_005221385.1	1	1	1	1	1	1	1	1	0	GCA_005221385.1	Agrobacterium	tumefaciens	strain=CFBP6623
GCA_005221405.1	1	1	1	1	1	1	1	1	0	GCA_005221405.1	Agrobacterium	tumefaciens	strain=CFBP7129
GCA_005221425.1	1	1	1	1	1	1	1	1	0	GCA_005221425.1	Agrobacterium	tumefaciens	strain=CFBP6624
GCA_005221445.1	1	1	1	1	1	1	1	1	0	GCA_005221445.1	Agrobacterium	tumefaciens	strain=CFBP6626
GCA_005221465.1	1	1	1	1	1	1	1	1	0	GCA_005221465.1	Agrobacterium	tumefaciens	strain=CFBP6625
GCA_013401495.1	1	0	1	1	1	1	1	1	0	GCA_013401495.1	Agrobacterium	tumefaciens	strain=EML4
GCA_014489975.1	1	1	1	1	1	1	1	1	0	GCA_014489975.1	Agrobacterium	tumefaciens	strain=BIM	B-1315G
GCA_016403145.1	1	1	1	1	1	1	1	1	0	GCA_016403145.1	Agrobacterium	tumefaciens	strain=FDAARGOS_1048
GCA_017584185.1	1	1	1	1	1	1	1	1	0	GCA_017584185.1	Agrobacterium	tumefaciens	strain=Q15/94
GCA_017726655.1	1	1	1	1	1	1	1	1	0	GCA_017726655.1	Agrobacterium	tumefaciens	strain=6N2
GCA_017897985.1	1	1	1	1	1	1	1	1	0	GCA_017897985.1	Agrobacterium	tumefaciens	strain=BIM	B-441
GCA_002005205.3	1	0	1	1	1	1	1	1	0	GCA_002005205.3	Agrobacterium	rhizogenes	strain=K599
GCA_016864595.1	1	0	1	1	1	1	1	1	0	GCA_016864595.1	Agrobacterium	rhizogenes	strain=LBA9402
GCA_017584205.1	1	0	1	1	1	1	1	1	0	GCA_017584205.1	Agrobacterium	rhizogenes	strain=CA75/95
GCA_018138105.1	0	0	0	0	0	0	0	0	0	GCA_018138105.1	Agrobacterium	rhizogenes	strain=A4
GCA_013426715.1	1	1	1	1	1	1	1	1	0	GCA_013426715.1	Agrobacterium	vitis	strain=VAT03-9
GCA_013426735.1	1	1	1	1	1	1	1	1	0	GCA_013426735.1	Agrobacterium	vitis	strain=VAR06-30
GCA_013427035.1	1	1	1	1	1	1	1	1	0	GCA_013427035.1	Agrobacterium	vitis	strain=VAR03-1
GCA_000807315.1	1	0	1	1	1	1	1	1	0	GCA_000807315.1	Bradyrhizobium	japonicum	strain=E109
GCA_001887695.1	1	1	1	1	1	1	1	1	0	GCA_001887695.1	Bradyrhizobium	japonicum	strain=J5
GCA_013752735.1	0	0	0	0	0	0	0	0	0	GCA_013752735.1	Bradyrhizobium	japonicum	strain=5038
GCA_900011245.1	1	1	1	1	1	1	1	1	0	GCA_900011245.1	Bradyrhizobium	sp.
GCA_002944405.1	1	1	1	1	1	1	1	1	0	GCA_002944405.1	Sinorhizobium	fredii	strain=NXT3
GCA_013170705.1	1	1	1	1	1	1	1	1	0	GCA_013170705.1	Mesorhizobium	loti	strain=NZP2042
GCA_013170865.1	1	1	1	1	1	1	1	1	0	GCA_013170865.1	Mesorhizobium	loti	strain=SU343
GCA_014189435.1	1	1	1	1	1	1	1	1	1	GCA_014189435.1	Mesorhizobium	loti	strain=582
GCA_000747295.1	1	1	1	1	1	1	1	1	0	GCA_000747295.1	Sinorhizobium	meliloti	strain=RMO17
GCA_002197025.1	1	1	1	1	1	1	1	1	0	GCA_002197025.1	Sinorhizobium	meliloti	strain=USDA1157
GCA_002197045.1	1	1	1	1	1	1	1	1	0	GCA_002197045.1	Sinorhizobium	meliloti	strain=Rm41
GCA_002197065.1	1	1	1	1	1	1	1	1	0	GCA_002197065.1	Sinorhizobium	meliloti	strain=USDA1106
GCA_002197085.1	1	1	1	1	1	1	1	1	0	GCA_002197085.1	Sinorhizobium	meliloti	strain=M270
GCA_002197105.1	1	1	1	1	1	1	1	1	0	GCA_002197105.1	Sinorhizobium	meliloti	strain=KH35c
GCA_002197125.1	1	1	1	1	1	1	1	1	0	GCA_002197125.1	Sinorhizobium	meliloti	strain=M162
GCA_002197145.1	1	1	1	1	1	1	1	1	0	GCA_002197145.1	Sinorhizobium	meliloti	strain=T073
GCA_002197165.1	1	1	1	1	1	1	1	1	0	GCA_002197165.1	Sinorhizobium	meliloti	strain=HM006
GCA_002197445.1	1	1	1	1	1	1	1	1	0	GCA_002197445.1	Sinorhizobium	meliloti	strain=USDA1021
GCA_002197465.1	1	1	1	1	1	1	1	1	0	GCA_002197465.1	Sinorhizobium	meliloti	strain=KH46
GCA_002215195.1	1	1	1	1	1	1	1	1	0	GCA_002215195.1	Sinorhizobium	meliloti	strain=CCMM	B554	(FSM-MA)
GCA_002302355.1	1	1	1	1	1	1	1	1	0	GCA_002302355.1	Sinorhizobium	meliloti	strain=B401
GCA_002302375.1	1	1	1	1	1	1	1	1	0	GCA_002302375.1	Sinorhizobium	meliloti	strain=B399
GCA_009664245.1	1	1	1	1	1	1	1	1	0	GCA_009664245.1	Sinorhizobium	meliloti	strain=AK21
GCA_014189595.1	1	1	1	1	1	1	1	1	0	GCA_014189595.1	Sinorhizobium	meliloti	strain=RCAM1115
GCA_014189615.1	1	1	1	1	1	1	1	1	0	GCA_014189615.1	Sinorhizobium	meliloti	strain=RCAM1750
GCA_015689095.1	1	1	1	1	1	1	1	1	0	GCA_015689095.1	Sinorhizobium	meliloti	strain=S35m
GCA_016406285.1	1	1	1	1	1	1	1	1	0	GCA_016406285.1	Sinorhizobium	meliloti	strain=AK76
GCA_001679785.1	1	1	1	1	1	1	1	1	0	GCA_001679785.1	Rhizobium	leguminosarum	strain=Vaf10
GCA_001890425.1	1	0	1	1	1	1	1	1	0	GCA_001890425.1	Rhizobium	leguminosarum	strain=Vaf-108
GCA_002953715.1	1	0	1	1	1	1	1	1	0	GCA_002953715.1	Rhizobium	leguminosarum	strain=Norway
GCA_003290405.1	1	1	1	1	1	1	1	1	0	GCA_003290405.1	Rhizobium	leguminosarum	strain=ATCC	14479
GCA_011128975.2	1	1	1	1	1	1	1	1	0	GCA_011128975.2	Rhizobium	leguminosarum	strain=A1
GCA_017348875.1	1	1	1	1	1	1	1	1	0	GCA_017348875.1	Rhizobium	leguminosarum	strain=OyaliB
GCA_017357305.1	1	0	1	1	1	1	1	1	0	GCA_017357305.1	Rhizobium	leguminosarum	strain=GLR17
GCA_000769405.2	1	1	1	1	1	1	1	1	0	GCA_000769405.2	Rhizobium	leguminosarum	bv.	trifolii	strain=CC275e
GCA_011604465.1	1	0	1	1	1	1	1	1	0	GCA_011604465.1	Rhizobium	leguminosarum	bv.	trifolii	strain=31B
GCA_011604485.1	1	1	1	1	1	1	1	1	0	GCA_011604485.1	Rhizobium	leguminosarum	bv.	trifolii	strain=9B
GCA_011604505.1	1	1	1	1	1	1	1	1	0	GCA_011604505.1	Rhizobium	leguminosarum	bv.	trifolii	strain=23B
GCA_011604525.1	1	1	1	1	1	1	1	1	0	GCA_011604525.1	Rhizobium	leguminosarum	bv.	trifolii	strain=22B
GCA_011604545.1	1	1	1	1	1	1	1	1	0	GCA_011604545.1	Rhizobium	leguminosarum	bv.	trifolii	strain=3B
GCA_011604565.1	1	1	1	1	1	1	1	1	0	GCA_011604565.1	Rhizobium	leguminosarum	bv.	trifolii	strain=4B
GCA_014189635.1	1	0	1	1	1	1	1	1	0	GCA_014189635.1	Rhizobium	leguminosarum	bv.	trifolii	strain=RCAM1365
GCA_002240185.1	1	1	1	1	1	1	1	1	0	GCA_002240185.1	Rhizobium	leguminosarum	bv.	viciae	strain=BIHB
GCA_002243365.1	1	0	1	1	1	1	1	1	0	GCA_002243365.1	Rhizobium	leguminosarum	bv.	viciae	strain=BIHB
GCA_002948295.1	1	0	1	1	1	1	1	1	0	GCA_002948295.1	Rhizobium	leguminosarum	bv.	viciae	strain=UPM791
GCA_014189555.1	1	1	0	0	1	1	1	0	0	GCA_014189555.1	Rhizobium	leguminosarum	bv.	viciae	strain=RCAM0610
GCA_014189575.1	1	0	1	1	1	1	1	1	0	GCA_014189575.1	Rhizobium	leguminosarum	bv.	viciae	strain=RCAM0626
GCA_014189655.1	1	0	1	1	1	1	1	1	0	GCA_014189655.1	Rhizobium	leguminosarum	bv.	viciae	strain=RCAM2802
GCA_000018545.1	1	1	1	1	1	1	1	1	0	GCA_000018545.1	Sinorhizobium	fredii	NGR234	strain=NGR234
GCA_001664105.1	1	1	1	1	1	1	1	1	0	GCA_001664105.1	Rhizobium	phaseoli	strain=N261
GCA_001664125.1	1	1	1	1	1	1	1	1	0	GCA_001664125.1	Rhizobium	phaseoli	strain=N831
GCA_001664165.1	1	1	1	1	1	1	1	1	0	GCA_001664165.1	Rhizobium	phaseoli	strain=N161
GCA_001664185.1	1	0	1	1	1	1	1	1	0	GCA_001664185.1	Rhizobium	phaseoli	strain=R744
GCA_001664205.1	1	1	1	1	1	1	1	1	0	GCA_001664205.1	Rhizobium	phaseoli	strain=R630
GCA_001664225.1	1	1	1	1	1	1	1	1	0	GCA_001664225.1	Rhizobium	phaseoli	strain=R723
GCA_001664245.1	1	1	1	1	1	1	1	1	0	GCA_001664245.1	Rhizobium	phaseoli	strain=R620
GCA_001664285.1	1	1	1	1	1	1	1	1	0	GCA_001664285.1	Rhizobium	phaseoli	strain=N931
GCA_001664365.1	1	1	1	1	1	1	1	1	0	GCA_001664365.1	Rhizobium	phaseoli	strain=N671
GCA_001664385.1	1	1	1	1	1	1	1	1	0	GCA_001664385.1	Rhizobium	phaseoli	strain=R650
GCA_001664405.1	1	1	1	1	1	1	1	1	0	GCA_001664405.1	Rhizobium	phaseoli	strain=N771
GCA_001664425.1	1	0	1	1	1	1	1	1	0	GCA_001664425.1	Rhizobium	phaseoli	strain=N841
GCA_001664445.1	1	1	1	1	1	1	1	1	0	GCA_001664445.1	Rhizobium	phaseoli	strain=R611
GCA_012241395.2	1	1	1	1	1	1	1	1	0	GCA_012241395.2	Rhizobium	phaseoli	strain=BS3
GCA_001971665.1	1	1	1	1	1	1	1	1	0	GCA_001971665.1	Methylorubrum	extorquens	strain=PSBB040
GCA_900234795.1	1	1	1	1	1	1	1	1	0	GCA_900234795.1	Methylorubrum	extorquens	strain=TK	1
GCA_002005445.1	1	0	1	1	1	1	1	1	0	GCA_002005445.1	Acetobacter	aceti	strain=TMW2.1153
GCA_014218315.1	1	0	1	1	1	1	1	1	0	GCA_014218315.1	Acetobacter	aceti	strain=JCM20276
GCA_014843995.1	1	0	1	1	1	1	1	1	0	GCA_014843995.1	Komagataeibacter	hansenii	strain=C110
GCA_001183745.1	1	1	1	1	0	1	1	1	0	GCA_001183745.1	Acetobacter	pasteurianus	strain=Ab3
GCA_009914215.1	1	0	1	1	1	1	1	1	0	GCA_009914215.1	Acetobacter	pasteurianus	strain=CICC	22518
GCA_001680825.1	1	0	1	1	1	1	1	1	0	GCA_001680825.1	Gluconobacter	oxydans	strain=1.637
GCA_001610735.1	1	0	1	1	0	1	1	0	0	GCA_001610735.1	Legionella	pneumophila	strain=L10-023
GCA_001652645.1	1	0	1	1	0	1	1	0	0	GCA_001652645.1	Legionella	pneumophila	strain=D-7632
GCA_001652665.1	1	0	1	1	0	1	1	0	0	GCA_001652665.1	Legionella	pneumophila	strain=D-7631
GCA_001652685.1	1	0	1	1	0	1	1	0	0	GCA_001652685.1	Legionella	pneumophila	strain=D-7630
GCA_001677075.2	1	0	1	1	0	1	1	0	0	GCA_001677075.2	Legionella	pneumophila	strain=OLDA
GCA_001677115.2	1	0	1	1	0	1	1	0	0	GCA_001677115.2	Legionella	pneumophila	strain=Pontiac
GCA_001752705.1	1	0	1	1	0	1	1	0	0	GCA_001752705.1	Legionella	pneumophila	strain=E10_P
GCA_001752725.1	1	0	1	1	0	1	1	0	0	GCA_001752725.1	Legionella	pneumophila	strain=E11_U
GCA_001752745.1	1	0	1	1	0	1	1	0	0	GCA_001752745.1	Legionella	pneumophila	strain=Philadelphia_1_ATCC
GCA_001752765.1	1	0	1	1	0	1	1	0	0	GCA_001752765.1	Legionella	pneumophila	strain=Philadelphia_1_CDC
GCA_001752785.1	1	0	1	1	0	1	1	0	0	GCA_001752785.1	Legionella	pneumophila	strain=Philadelphia_2
GCA_001752805.1	1	0	1	1	0	1	1	0	0	GCA_001752805.1	Legionella	pneumophila	strain=Philadelphia_3
GCA_001752825.1	1	0	1	1	0	1	1	0	0	GCA_001752825.1	Legionella	pneumophila	strain=Philadelphia_4
GCA_001752845.1	1	0	1	1	0	1	1	0	0	GCA_001752845.1	Legionella	pneumophila	strain=C1_S
GCA_001752865.1	1	0	1	1	0	1	1	0	0	GCA_001752865.1	Legionella	pneumophila	strain=C2_S
GCA_001752885.1	1	0	1	1	0	1	1	0	0	GCA_001752885.1	Legionella	pneumophila	strain=C3_O
GCA_001752905.1	1	0	1	1	0	1	1	0	0	GCA_001752905.1	Legionella	pneumophila	strain=C4_S
GCA_001752925.1	1	0	1	1	0	1	1	0	0	GCA_001752925.1	Legionella	pneumophila	strain=C5_P
GCA_001752945.1	1	0	1	1	0	1	1	0	0	GCA_001752945.1	Legionella	pneumophila	strain=C6_S
GCA_001752965.1	1	0	1	1	0	1	1	0	0	GCA_001752965.1	Legionella	pneumophila	strain=C7_O
GCA_001753065.1	1	0	1	1	0	1	1	0	0	GCA_001753065.1	Legionella	pneumophila	strain=C8_S
GCA_001753085.1	1	0	1	1	0	1	1	0	0	GCA_001753085.1	Legionella	pneumophila	strain=C9_S
GCA_001753105.1	1	0	1	1	0	1	1	0	0	GCA_001753105.1	Legionella	pneumophila	strain=C10_S
GCA_001753125.1	1	0	1	1	0	1	1	0	0	GCA_001753125.1	Legionella	pneumophila	strain=C11_O
GCA_001753145.1	1	0	1	1	0	1	1	0	0	GCA_001753145.1	Legionella	pneumophila	strain=E1_P
GCA_001753265.1	1	0	1	1	0	1	1	0	0	GCA_001753265.1	Legionella	pneumophila	strain=E2_N
GCA_001753285.1	1	0	1	1	0	1	1	0	0	GCA_001753285.1	Legionella	pneumophila	strain=E3_N
GCA_001753305.1	1	0	1	1	0	1	1	0	0	GCA_001753305.1	Legionella	pneumophila	strain=E4_N
GCA_001753325.1	1	0	1	1	0	1	1	0	0	GCA_001753325.1	Legionella	pneumophila	strain=E5_N
GCA_001753345.1	1	0	1	1	0	1	1	0	0	GCA_001753345.1	Legionella	pneumophila	strain=E6_N
GCA_001753365.1	1	0	1	1	0	1	1	0	0	GCA_001753365.1	Legionella	pneumophila	strain=E7_O
GCA_001753385.1	1	0	1	1	0	1	1	0	0	GCA_001753385.1	Legionella	pneumophila	strain=E8_O
GCA_001753405.1	1	0	1	1	0	1	1	0	0	GCA_001753405.1	Legionella	pneumophila	strain=E9_O
GCA_001941585.1	1	0	1	1	0	1	1	0	0	GCA_001941585.1	Legionella	pneumophila	strain=Philadelphia-1
GCA_001969405.1	1	0	1	1	0	1	1	0	0	GCA_001969405.1	Legionella	pneumophila	strain=F4469
GCA_001989475.1	1	0	1	1	0	1	1	0	0	GCA_001989475.1	Legionella	pneumophila	strain=F4468
GCA_002813715.1	1	0	1	1	0	1	1	0	0	GCA_002813715.1	Legionella	pneumophila	strain=D6026
GCA_002813735.1	1	0	1	1	0	1	1	0	0	GCA_002813735.1	Legionella	pneumophila	strain=D5945
GCA_003003515.1	0	0	0	0	0	0	0	0	0	GCA_003003515.1	Legionella	pneumophila	strain=D-4954
GCA_003003535.1	0	0	0	0	0	0	0	0	0	GCA_003003535.1	Legionella	pneumophila	strain=NY24	(D-7706)
GCA_003003555.1	0	0	0	0	0	0	0	0	0	GCA_003003555.1	Legionella	pneumophila	strain=NY23	(D-7705)
GCA_003004065.1	0	0	0	0	0	0	0	0	0	GCA_003004065.1	Legionella	pneumophila	strain=D-7708
GCA_003004195.1	0	0	0	0	0	0	0	0	0	GCA_003004195.1	Legionella	pneumophila	strain=D-5265
GCA_003004235.1	0	0	0	0	0	0	0	0	0	GCA_003004235.1	Legionella	pneumophila	strain=D-4040
GCA_003004335.1	0	0	0	0	0	0	0	0	0	GCA_003004335.1	Legionella	pneumophila	strain=D-7787
GCA_006364635.1	1	0	1	1	0	1	1	0	0	GCA_006364635.1	Legionella	pneumophila	strain=FDAARGOS_779
GCA_009664815.1	1	0	1	1	0	1	1	0	0	GCA_009664815.1	Legionella	pneumophila	strain=AUSMDU00010536
GCA_010669065.1	1	0	1	1	0	1	1	0	0	GCA_010669065.1	Legionella	pneumophila	strain=ERS1305867
GCA_900092465.1	0	0	0	0	0	0	0	0	0	GCA_900092465.1	Legionella	pneumophila	strain=Lpm7613
GCA_900119755.1	1	0	1	1	0	1	1	0	0	GCA_900119755.1	Legionella	pneumophila	strain=ST23
GCA_900119765.1	1	0	1	1	0	1	1	0	0	GCA_900119765.1	Legionella	pneumophila	strain=ST62
GCA_900119775.1	1	0	1	1	0	1	1	0	0	GCA_900119775.1	Legionella	pneumophila	strain=ST37
GCA_900119785.1	1	0	1	1	0	1	1	0	0	GCA_900119785.1	Legionella	pneumophila	strain=ST42
GCA_900186855.1	1	0	1	1	0	1	1	0	0	GCA_900186855.1	Legionella	pneumophila	strain=NCTC11286
GCA_900186925.1	1	0	1	1	0	1	1	0	0	GCA_900186925.1	Legionella	pneumophila	strain=NCTC11985
GCA_900475735.1	1	0	1	1	0	1	1	0	0	GCA_900475735.1	Legionella	pneumophila	strain=NCTC11404
GCA_900635115.1	1	0	1	1	0	1	1	0	0	GCA_900635115.1	Legionella	pneumophila	strain=NCTC12180
GCA_900635825.1	1	0	1	1	0	1	1	0	0	GCA_900635825.1	Legionella	pneumophila	strain=NCTC12179
GCA_900636955.1	1	0	1	1	0	1	1	0	0	GCA_900636955.1	Legionella	pneumophila	strain=NCTC11193
GCA_000953655.1	1	1	1	1	0	1	1	0	0	GCA_000953655.1	Legionella	hackeliae
GCA_002073455.2	1	0	1	1	1	1	1	0	0	GCA_002073455.2	Legionella	longbeachae	strain=FDAARGOS_201
GCA_002113845.3	1	0	1	1	1	1	1	0	0	GCA_002113845.3	Legionella	longbeachae	strain=F1157CHC
GCA_008807315.1	1	0	1	1	1	1	1	0	0	GCA_008807315.1	Legionella	longbeachae	strain=B3526CHC
GCA_011465255.1	1	0	1	1	1	1	1	0	0	GCA_011465255.1	Legionella	longbeachae	strain=B1445CHC
GCA_011465395.1	1	0	1	1	1	1	1	0	0	GCA_011465395.1	Legionella	longbeachae	strain=B41211CHC
GCA_000953635.1	1	0	1	1	0	1	1	0	0	GCA_000953635.1	Tatlockia	micdadei	strain=ATCC33218
GCA_002085715.1	1	0	1	1	0	1	1	0	0	GCA_002085715.1	Tatlockia	micdadei	strain=NZ2015
GCA_002085735.1	1	0	1	1	0	1	1	0	0	GCA_002085735.1	Tatlockia	micdadei	strain=NZ2016
GCA_900186965.1	1	0	1	1	0	1	1	0	0	GCA_900186965.1	Legionella	spiritensis	strain=NCTC11990
GCA_900637495.1	1	0	1	1	0	1	1	0	0	GCA_900637495.1	Legionella	spiritensis	strain=NCTC12082
GCA_004564155.1	1	0	1	1	0	1	1	0	0	GCA_004564155.1	Legionella	israelensis	strain=HL-0427-4011
GCA_004571175.1	1	0	1	1	0	1	1	0	0	GCA_004571175.1	Legionella	israelensis	strain=Bercovier	4
GCA_007361795.1	1	0	1	1	0	1	1	0	0	GCA_007361795.1	Legionella	israelensis	strain=L18-01051
GCA_900637635.1	1	0	1	1	0	1	1	0	0	GCA_900637635.1	Legionella	jordanis	strain=NCTC11533
GCA_000695855.3	1	1	1	1	1	1	1	1	0	GCA_000695855.3	Acinetobacter	baumannii	strain=AC29
GCA_000746605.1	1	1	1	1	1	1	1	1	0	GCA_000746605.1	Acinetobacter	baumannii	strain=AB031
GCA_000746645.1	1	1	1	1	1	1	1	1	0	GCA_000746645.1	Acinetobacter	baumannii	strain=AB030
GCA_000761175.1	1	1	1	1	1	1	1	1	0	GCA_000761175.1	Acinetobacter	baumannii	strain=AbH12O-A2
GCA_000814345.1	1	1	1	1	1	1	1	1	0	GCA_000814345.1	Acinetobacter	baumannii	strain=6200
GCA_000828935.1	1	1	1	1	1	1	1	1	0	GCA_000828935.1	Acinetobacter	baumannii	strain=IOMTU	433
GCA_000830055.1	1	1	1	1	1	1	1	1	0	GCA_000830055.1	Acinetobacter	baumannii	strain=A1
GCA_000939415.2	1	1	0	1	1	1	1	1	0	GCA_000939415.2	Acinetobacter	baumannii	strain=ORAB01
GCA_000963815.1	1	1	1	1	1	1	1	1	0	GCA_000963815.1	Acinetobacter	baumannii	strain=AB5075-UW
GCA_001026965.1	1	1	1	1	1	1	1	1	0	GCA_001026965.1	Acinetobacter	baumannii	strain=XH386
GCA_001077555.2	1	1	1	1	1	1	1	1	0	GCA_001077555.2	Acinetobacter	baumannii	strain=B8342
GCA_001077655.1	1	1	1	1	1	1	1	1	0	GCA_001077655.1	Acinetobacter	baumannii	strain=Ab04-mff
GCA_001077675.1	1	1	1	1	1	1	1	1	0	GCA_001077675.1	Acinetobacter	baumannii	strain=ATCC	17978-mff
GCA_001077965.2	1	1	1	1	1	1	1	1	0	GCA_001077965.2	Acinetobacter	baumannii	strain=B8300
GCA_001261895.2	1	1	1	1	1	1	1	1	0	GCA_001261895.2	Acinetobacter	baumannii
GCA_001399655.1	1	1	1	1	1	1	1	1	0	GCA_001399655.1	Acinetobacter	baumannii	strain=D36
GCA_001457535.1	1	1	1	1	1	1	1	1	0	GCA_001457535.1	Acinetobacter	baumannii
GCA_001514375.1	1	1	1	1	1	1	1	1	0	GCA_001514375.1	Acinetobacter	baumannii	strain=KBN10P02143
GCA_001517645.1	1	1	1	1	1	1	1	1	0	GCA_001517645.1	Acinetobacter	baumannii
GCA_001543995.1	1	1	1	1	1	1	1	1	0	GCA_001543995.1	Acinetobacter	baumannii	strain=YU-R612
GCA_001573065.1	1	1	1	1	1	1	1	1	0	GCA_001573065.1	Acinetobacter	baumannii	strain=XH860
GCA_001573085.1	1	1	1	1	1	1	1	1	0	GCA_001573085.1	Acinetobacter	baumannii	strain=XH859
GCA_001573105.1	1	1	1	1	1	1	1	1	0	GCA_001573105.1	Acinetobacter	baumannii	strain=XH857
GCA_001573125.1	1	1	1	1	1	1	1	1	0	GCA_001573125.1	Acinetobacter	baumannii	strain=XH856
GCA_001578145.1	1	1	1	1	1	1	1	1	0	GCA_001578145.1	Acinetobacter	baumannii	strain=XH858
GCA_001593425.2	1	1	1	1	1	1	1	1	0	GCA_001593425.2	Acinetobacter	baumannii	strain=ATCC	17978
GCA_001636235.1	1	1	1	1	1	1	1	1	0	GCA_001636235.1	Acinetobacter	baumannii	strain=3207
GCA_001668465.2	1	1	1	1	1	1	1	1	0	GCA_001668465.2	Acinetobacter	baumannii	strain=ABUH773
GCA_001669145.2	1	1	1	1	1	1	1	1	0	GCA_001669145.2	Acinetobacter	baumannii	strain=ABUH793
GCA_001674475.2	1	1	1	1	1	1	1	1	0	GCA_001674475.2	Acinetobacter	baumannii	strain=ABUH763
GCA_001674505.2	1	1	1	1	1	1	1	1	0	GCA_001674505.2	Acinetobacter	baumannii	strain=ABUH796
GCA_001721705.1	1	1	1	1	1	1	1	1	0	GCA_001721705.1	Acinetobacter	baumannii	strain=CA-17
GCA_001806345.1	1	1	1	1	1	1	1	1	0	GCA_001806345.1	Acinetobacter	baumannii	strain=KAB01
GCA_001806365.1	1	1	1	1	1	1	1	1	0	GCA_001806365.1	Acinetobacter	baumannii	strain=KAB02
GCA_001806385.1	1	1	1	1	1	1	1	1	0	GCA_001806385.1	Acinetobacter	baumannii	strain=KAB03
GCA_001806405.1	1	1	1	1	1	1	1	1	0	GCA_001806405.1	Acinetobacter	baumannii	strain=KAB04
GCA_001806425.1	1	1	1	1	1	1	1	1	0	GCA_001806425.1	Acinetobacter	baumannii	strain=KAB05
GCA_001806445.1	1	1	1	1	1	1	1	1	0	GCA_001806445.1	Acinetobacter	baumannii	strain=KAB06
GCA_001806465.1	1	1	1	1	1	1	1	1	0	GCA_001806465.1	Acinetobacter	baumannii	strain=KAB07
GCA_001806485.1	1	1	1	1	1	1	1	1	0	GCA_001806485.1	Acinetobacter	baumannii	strain=KAB08
GCA_001887305.1	1	1	1	1	1	1	1	1	0	GCA_001887305.1	Acinetobacter	baumannii	strain=HRAB-85
GCA_001895125.2	0	0	0	0	0	0	0	0	0	GCA_001895125.2	Acinetobacter	baumannii	strain=OCU_Ac16a
GCA_001895985.1	1	1	1	1	1	1	1	1	0	GCA_001895985.1	Acinetobacter	baumannii	strain=AF-673
GCA_001896005.1	1	1	1	1	1	1	1	1	0	GCA_001896005.1	Acinetobacter	baumannii	strain=AF-401
GCA_001902375.1	1	1	1	1	1	1	1	1	0	GCA_001902375.1	Acinetobacter	baumannii	strain=XDR-BJ83
GCA_001908295.1	1	1	1	1	1	1	1	1	0	GCA_001908295.1	Acinetobacter	baumannii	strain=LAC4
GCA_001922205.1	1	1	1	1	1	1	1	1	0	GCA_001922205.1	Acinetobacter	baumannii	strain=CMC-CR-MDR-Ab4
GCA_001922225.1	1	1	1	1	1	1	1	1	0	GCA_001922225.1	Acinetobacter	baumannii
GCA_001922245.1	1	1	1	1	1	1	1	1	0	GCA_001922245.1	Acinetobacter	baumannii	strain=CMC-CR-MDR-Ab66
GCA_001941765.1	1	1	1	1	1	1	1	1	0	GCA_001941765.1	Acinetobacter	baumannii	strain=AB042
GCA_002009115.1	1	1	1	1	1	1	1	1	0	GCA_002009115.1	Acinetobacter	baumannii	strain=AB34299
GCA_002082625.2	1	1	1	1	1	1	1	1	0	GCA_002082625.2	Acinetobacter	baumannii	strain=JBA13
GCA_002082645.1	1	1	1	1	1	1	1	1	0	GCA_002082645.1	Acinetobacter	baumannii	strain=CBA7
GCA_002082685.1	1	1	1	1	1	1	1	1	0	GCA_002082685.1	Acinetobacter	baumannii	strain=15A34
GCA_002082705.1	1	1	1	1	1	1	1	1	0	GCA_002082705.1	Acinetobacter	baumannii	strain=15A5
GCA_002082725.1	1	1	1	1	1	1	1	1	0	GCA_002082725.1	Acinetobacter	baumannii	strain=USA2
GCA_002082745.1	1	1	1	1	1	1	1	1	0	GCA_002082745.1	Acinetobacter	baumannii	strain=SSA6
GCA_002082785.1	1	1	1	1	1	1	1	1	0	GCA_002082785.1	Acinetobacter	baumannii	strain=HWBA8
GCA_002082805.1	1	1	1	1	1	1	1	1	0	GCA_002082805.1	Acinetobacter	baumannii	strain=WKA02
GCA_002082825.1	1	1	1	1	0	1	1	1	0	GCA_002082825.1	Acinetobacter	baumannii	strain=USA15
GCA_002082845.1	1	1	1	1	1	1	1	1	0	GCA_002082845.1	Acinetobacter	baumannii	strain=SAA14
GCA_002082865.1	1	1	1	1	1	1	1	1	0	GCA_002082865.1	Acinetobacter	baumannii	strain=SSA12
GCA_002082885.1	1	1	1	1	1	1	1	1	0	GCA_002082885.1	Acinetobacter	baumannii	strain=SSMA17
GCA_002116925.1	1	1	1	1	1	1	1	1	0	GCA_002116925.1	Acinetobacter	baumannii	strain=ab736
GCA_002210065.1	1	1	1	1	1	1	1	1	0	GCA_002210065.1	Acinetobacter	baumannii	strain=A85
GCA_002504145.1	1	1	1	1	1	1	1	1	0	GCA_002504145.1	Acinetobacter	baumannii	strain=A1296
GCA_002741415.1	1	1	1	1	1	1	1	1	0	GCA_002741415.1	Acinetobacter	baumannii	strain=A388
GCA_002753915.1	1	1	1	1	1	1	1	1	0	GCA_002753915.1	Acinetobacter	baumannii	strain=AbPK1
GCA_002761575.1	1	1	1	1	1	1	1	1	0	GCA_002761575.1	Acinetobacter	baumannii	strain=AYP-A2
GCA_002762095.1	1	1	1	1	1	1	1	1	0	GCA_002762095.1	Acinetobacter	baumannii	strain=Ab4977
GCA_002762115.1	1	1	1	1	1	1	1	1	0	GCA_002762115.1	Acinetobacter	baumannii	strain=Ab4568
GCA_002762155.1	1	1	1	1	1	1	1	1	0	GCA_002762155.1	Acinetobacter	baumannii	strain=Ab4653
GCA_002762545.2	1	1	1	1	1	1	1	1	0	GCA_002762545.2	Acinetobacter	baumannii	strain=VB23193
GCA_002843665.1	1	1	1	1	1	1	1	1	0	GCA_002843665.1	Acinetobacter	baumannii
GCA_002902885.1	1	1	1	1	1	1	1	1	0	GCA_002902885.1	Acinetobacter	baumannii	strain=ABNIH28
GCA_002947415.1	1	1	1	1	1	1	1	1	0	GCA_002947415.1	Acinetobacter	baumannii	strain=AR_0056
GCA_002947845.1	1	1	1	1	1	1	1	1	0	GCA_002947845.1	Acinetobacter	baumannii	strain=AR_0063
GCA_002948925.1	1	1	1	1	1	1	1	1	0	GCA_002948925.1	Acinetobacter	baumannii	strain=AR_0078
GCA_002950495.2	1	1	1	1	1	1	1	1	0	GCA_002950495.2	Acinetobacter	baumannii	strain=WCHAB005133
GCA_002996805.1	1	1	1	1	1	1	1	1	0	GCA_002996805.1	Acinetobacter	baumannii	strain=AR_0083
GCA_002999195.2	1	1	1	1	1	1	1	1	0	GCA_002999195.2	Acinetobacter	baumannii	strain=WCHAB005078
GCA_003006035.1	1	1	1	1	1	1	1	1	0	GCA_003006035.1	Acinetobacter	baumannii	strain=AR_0088
GCA_003010655.1	1	1	1	1	1	1	1	1	0	GCA_003010655.1	Acinetobacter	baumannii	strain=AR_0102
GCA_003010675.1	1	1	1	1	1	1	1	1	0	GCA_003010675.1	Acinetobacter	baumannii	strain=AR_0101
GCA_003012895.2	1	1	1	1	1	1	1	1	0	GCA_003012895.2	Acinetobacter	baumannii	strain=DS002
GCA_003029495.1	1	1	1	1	1	1	1	1	0	GCA_003029495.1	Acinetobacter	baumannii	strain=AR_0056
GCA_003181015.1	1	1	1	1	1	1	1	1	0	GCA_003181015.1	Acinetobacter	baumannii	strain=DA33098
GCA_003264255.1	1	1	1	1	1	1	1	1	0	GCA_003264255.1	Acinetobacter	baumannii	strain=XH731
GCA_003264275.1	1	1	1	1	1	1	1	1	0	GCA_003264275.1	Acinetobacter	baumannii	strain=XH386
GCA_003264295.1	1	1	1	1	1	1	1	1	0	GCA_003264295.1	Acinetobacter	baumannii	strain=XH731
GCA_003288775.1	0	0	0	0	0	0	0	0	0	GCA_003288775.1	Acinetobacter	baumannii	strain=Aba
GCA_003296225.1	1	1	1	1	1	1	1	1	0	GCA_003296225.1	Acinetobacter	baumannii	strain=DA33382
GCA_003345235.1	1	1	1	1	1	1	1	1	0	GCA_003345235.1	Acinetobacter	baumannii	strain=810CP
GCA_003359255.2	1	1	1	1	0	1	1	0	0	GCA_003359255.2	Acinetobacter	baumannii	strain=2008S11-069
GCA_003431385.1	1	1	1	1	1	1	1	1	0	GCA_003431385.1	Acinetobacter	baumannii	strain=7804
GCA_003431865.1	1	1	1	1	1	1	1	1	0	GCA_003431865.1	Acinetobacter	baumannii	strain=AR_0070
GCA_003516005.1	1	1	1	1	1	1	1	1	0	GCA_003516005.1	Acinetobacter	baumannii	strain=7847
GCA_003522665.1	1	1	1	1	1	1	1	1	0	GCA_003522665.1	Acinetobacter	baumannii	strain=9201
GCA_003522705.1	1	1	1	1	0	1	1	1	0	GCA_003522705.1	Acinetobacter	baumannii	strain=10324
GCA_003522785.1	1	1	1	1	1	1	1	1	0	GCA_003522785.1	Acinetobacter	baumannii	strain=10042
GCA_003522845.1	1	1	1	1	1	1	1	1	0	GCA_003522845.1	Acinetobacter	baumannii	strain=9102
GCA_003522885.1	1	1	1	1	1	1	1	1	0	GCA_003522885.1	Acinetobacter	baumannii	strain=5845
GCA_003547115.1	1	1	1	1	1	1	1	1	0	GCA_003547115.1	Acinetobacter	baumannii	strain=AR_0052
GCA_003591615.1	1	1	1	1	1	1	1	1	0	GCA_003591615.1	Acinetobacter	baumannii	strain=XH906
GCA_003627485.2	1	1	1	1	1	1	1	1	0	GCA_003627485.2	Acinetobacter	baumannii	strain=VB31459
GCA_003812065.1	1	1	1	1	1	1	1	1	0	GCA_003812065.1	Acinetobacter	baumannii	strain=FDAARGOS_540
GCA_003812385.1	1	1	1	1	1	1	1	1	0	GCA_003812385.1	Acinetobacter	baumannii	strain=FDAARGOS_533
GCA_003812485.1	1	1	1	1	1	1	1	1	0	GCA_003812485.1	Acinetobacter	baumannii	strain=MRSN15313
GCA_003931755.1	1	1	1	1	1	1	1	1	0	GCA_003931755.1	Acinetobacter	baumannii
GCA_003931775.1	1	1	1	1	1	1	1	1	0	GCA_003931775.1	Acinetobacter	baumannii
GCA_003948085.2	1	1	1	1	1	1	1	1	0	GCA_003948085.2	Acinetobacter	baumannii	strain=TG31986
GCA_003948455.2	1	1	1	1	1	1	1	1	0	GCA_003948455.2	Acinetobacter	baumannii	strain=TG22653
GCA_003948535.2	1	1	1	1	1	1	1	1	0	GCA_003948535.2	Acinetobacter	baumannii	strain=TG22627
GCA_003949115.2	1	1	1	1	1	1	1	1	0	GCA_003949115.2	Acinetobacter	baumannii	strain=TG31302
GCA_003949595.2	1	1	1	1	1	1	1	1	0	GCA_003949595.2	Acinetobacter	baumannii	strain=TG22182
GCA_003949725.2	1	1	1	1	1	1	1	1	0	GCA_003949725.2	Acinetobacter	baumannii	strain=TG29392
GCA_004028375.1	1	1	1	1	0	1	1	1	0	GCA_004028375.1	Acinetobacter	baumannii	strain=A52
GCA_004101685.1	1	1	1	1	1	1	1	1	0	GCA_004101685.1	Acinetobacter	baumannii	strain=11A1314CRGN088
GCA_004101705.1	1	1	1	1	1	1	1	1	0	GCA_004101705.1	Acinetobacter	baumannii	strain=11A14CRGN003
GCA_004101725.1	1	1	1	1	1	1	1	1	0	GCA_004101725.1	Acinetobacter	baumannii	strain=11A1213CRGN055
GCA_004101745.1	1	1	1	1	1	1	1	1	0	GCA_004101745.1	Acinetobacter	baumannii	strain=11A1213CRGN008
GCA_004136355.1	1	1	1	1	1	1	1	1	0	GCA_004136355.1	Acinetobacter	baumannii	strain=MDR-UNC
GCA_004194555.1	1	1	1	1	1	1	1	1	0	GCA_004194555.1	Acinetobacter	baumannii	strain=NCIMB	8209
GCA_004564095.1	1	1	1	1	1	1	1	1	0	GCA_004564095.1	Acinetobacter	baumannii	strain=EC
GCA_004564115.1	1	1	1	1	1	1	1	1	0	GCA_004564115.1	Acinetobacter	baumannii	strain=EH
GCA_004758865.1	1	1	1	1	1	1	1	1	0	GCA_004758865.1	Acinetobacter	baumannii	strain=CIAT758
GCA_004768705.1	1	1	1	1	1	1	1	1	0	GCA_004768705.1	Acinetobacter	baumannii	strain=ACN21
GCA_005280355.1	1	1	1	1	1	1	1	1	0	GCA_005280355.1	Acinetobacter	baumannii	strain=VB958
GCA_005280375.1	1	1	1	1	1	1	1	1	0	GCA_005280375.1	Acinetobacter	baumannii	strain=VB1190
GCA_005280395.1	1	1	1	1	1	1	1	1	0	GCA_005280395.1	Acinetobacter	baumannii	strain=VB35179
GCA_005280415.1	1	1	1	1	1	1	1	1	0	GCA_005280415.1	Acinetobacter	baumannii	strain=VB35435
GCA_005280435.1	1	1	1	1	1	1	1	1	0	GCA_005280435.1	Acinetobacter	baumannii	strain=VB16141
GCA_005280675.1	1	1	1	1	1	1	1	1	0	GCA_005280675.1	Acinetobacter	baumannii	strain=SP304
GCA_005280695.1	1	1	1	1	1	1	1	1	0	GCA_005280695.1	Acinetobacter	baumannii	strain=VB33071
GCA_005280715.1	1	1	1	1	1	1	1	1	0	GCA_005280715.1	Acinetobacter	baumannii	strain=VB35575
GCA_005518095.1	1	1	1	1	0	1	1	1	0	GCA_005518095.1	Acinetobacter	baumannii	strain=P7774
GCA_005671375.1	1	1	1	1	1	1	1	1	0	GCA_005671375.1	Acinetobacter	baumannii	strain=PB364
GCA_006385075.1	1	1	1	1	1	1	1	1	0	GCA_006385075.1	Acinetobacter	baumannii	strain=11W359501
GCA_007107525.1	1	1	1	1	1	1	1	1	0	GCA_007107525.1	Acinetobacter	baumannii	strain=J9
GCA_007221455.1	1	1	1	1	1	1	1	1	0	GCA_007221455.1	Acinetobacter	baumannii	strain=A320	(RUH134)
GCA_007647215.1	1	1	1	1	1	1	1	1	0	GCA_007647215.1	Acinetobacter	baumannii	strain=MDR-CQ
GCA_008033255.2	1	1	1	1	1	1	1	1	0	GCA_008033255.2	Acinetobacter	baumannii	strain=ATCC	BAA-1790
GCA_008124045.1	1	1	1	1	1	1	1	1	0	GCA_008124045.1	Acinetobacter	baumannii	strain=PG20180064
GCA_008244865.1	1	1	1	1	1	1	1	1	0	GCA_008244865.1	Acinetobacter	baumannii	strain=11A1213CRGN064
GCA_008244885.1	1	1	1	1	1	1	1	1	0	GCA_008244885.1	Acinetobacter	baumannii	strain=N13-03449
GCA_008244905.1	1	1	1	1	1	1	1	1	0	GCA_008244905.1	Acinetobacter	baumannii	strain=11A1314CRGN089
GCA_008630895.1	1	1	1	1	1	1	1	1	0	GCA_008630895.1	Acinetobacter	baumannii	strain=AB043
GCA_008632635.1	1	1	1	1	1	1	1	1	0	GCA_008632635.1	Acinetobacter	baumannii	strain=K09-14
GCA_008802935.1	1	1	1	1	1	1	1	1	0	GCA_008802935.1	Acinetobacter	baumannii	strain=CAM180-1
GCA_008807055.1	1	1	1	1	1	1	1	1	0	GCA_008807055.1	Acinetobacter	baumannii	strain=C25
GCA_008931365.1	1	1	1	1	1	1	1	1	0	GCA_008931365.1	Acinetobacter	baumannii	strain=E47
GCA_009035845.1	1	1	1	1	1	1	1	1	0	GCA_009035845.1	Acinetobacter	baumannii	strain=ATCC	19606
GCA_009455505.1	1	1	1	1	1	1	1	1	0	GCA_009455505.1	Acinetobacter	baumannii	strain=6507
GCA_009497995.1	1	1	1	1	1	1	1	1	0	GCA_009497995.1	Acinetobacter	baumannii	strain=7835
GCA_009498335.1	1	1	1	1	1	1	1	1	0	GCA_009498335.1	Acinetobacter	baumannii	strain=ABCR01
GCA_009740145.1	1	1	1	1	1	1	1	1	0	GCA_009740145.1	Acinetobacter	baumannii	strain=XL380
GCA_009759685.1	1	1	1	1	1	1	1	1	0	GCA_009759685.1	Acinetobacter	baumannii	strain=ATCC	19606
GCA_009833005.1	1	1	1	1	1	1	1	1	0	GCA_009833005.1	Acinetobacter	baumannii	strain=AbCAN2
GCA_011067065.1	0	0	0	0	0	0	0	0	0	GCA_011067065.1	Acinetobacter	baumannii	strain=ATCC	17978
GCA_012272715.1	1	1	1	1	1	1	1	1	0	GCA_012272715.1	Acinetobacter	baumannii	strain=DT-Ab057
GCA_012272735.1	1	1	1	1	1	1	1	1	0	GCA_012272735.1	Acinetobacter	baumannii	strain=DT-Ab022
GCA_012272755.1	1	1	1	1	1	1	1	1	0	GCA_012272755.1	Acinetobacter	baumannii	strain=DT-Ab020
GCA_012272775.1	1	1	1	1	1	1	1	1	0	GCA_012272775.1	Acinetobacter	baumannii	strain=DT-Ab007
GCA_012272795.1	1	1	1	1	1	1	1	1	0	GCA_012272795.1	Acinetobacter	baumannii	strain=DT-Ab003
GCA_012931605.1	1	1	1	1	1	1	1	1	0	GCA_012931605.1	Acinetobacter	baumannii	strain=Ab-C102
GCA_012931625.1	1	1	1	1	1	1	1	1	0	GCA_012931625.1	Acinetobacter	baumannii	strain=Ab-D10a-a
GCA_012931645.1	1	1	1	1	1	1	1	1	0	GCA_012931645.1	Acinetobacter	baumannii	strain=Ab-B004d-c
GCA_012931665.1	1	1	1	1	1	1	1	1	0	GCA_012931665.1	Acinetobacter	baumannii	strain=Ab-C63
GCA_012934905.1	1	1	1	1	1	1	1	1	0	GCA_012934905.1	Acinetobacter	baumannii	strain=VB82
GCA_012934925.1	1	1	1	1	1	1	1	1	0	GCA_012934925.1	Acinetobacter	baumannii	strain=VB473
GCA_012934945.1	1	1	1	1	1	1	1	1	0	GCA_012934945.1	Acinetobacter	baumannii	strain=VB723
GCA_012934965.1	1	1	1	1	1	1	1	1	0	GCA_012934965.1	Acinetobacter	baumannii	strain=VB11737
GCA_012934985.1	1	1	1	1	1	1	1	1	0	GCA_012934985.1	Acinetobacter	baumannii	strain=VB2181
GCA_012935005.1	1	1	1	1	1	1	1	1	0	GCA_012935005.1	Acinetobacter	baumannii	strain=VB2486
GCA_012935025.1	1	1	1	1	1	1	1	1	0	GCA_012935025.1	Acinetobacter	baumannii	strain=VB2200
GCA_012935045.1	1	1	1	1	1	1	1	1	0	GCA_012935045.1	Acinetobacter	baumannii	strain=PM1912235
GCA_012935065.1	1	1	1	1	1	1	1	1	0	GCA_012935065.1	Acinetobacter	baumannii	strain=PM192696
GCA_012935085.1	1	1	1	1	1	1	1	1	0	GCA_012935085.1	Acinetobacter	baumannii	strain=PM193665
GCA_012935105.1	1	1	1	1	1	1	1	1	0	GCA_012935105.1	Acinetobacter	baumannii	strain=PM194188
GCA_012935125.1	1	1	1	1	1	1	1	1	0	GCA_012935125.1	Acinetobacter	baumannii	strain=PM194229
GCA_012935145.1	1	1	1	1	1	1	1	1	0	GCA_012935145.1	Acinetobacter	baumannii	strain=VB7036
GCA_012935165.1	1	1	1	1	1	1	1	1	0	GCA_012935165.1	Acinetobacter	baumannii	strain=VB2139
GCA_012935185.1	1	1	1	1	1	1	1	1	0	GCA_012935185.1	Acinetobacter	baumannii	strain=VB2107
GCA_012974585.1	1	1	1	1	1	1	1	1	0	GCA_012974585.1	Acinetobacter	baumannii	strain=ABF9692
GCA_012974845.1	1	1	1	1	1	1	1	1	0	GCA_012974845.1	Acinetobacter	baumannii	strain=CUVET-MIC596
GCA_013305465.1	1	1	1	1	1	1	1	1	0	GCA_013305465.1	Acinetobacter	baumannii	strain=MS14413
GCA_013376855.2	1	1	1	1	1	1	1	1	0	GCA_013376855.2	Acinetobacter	baumannii	strain=TP1
GCA_013377175.1	1	1	1	1	1	1	1	1	0	GCA_013377175.1	Acinetobacter	baumannii	strain=A1429
GCA_013394265.1	1	1	1	1	1	1	1	1	0	GCA_013394265.1	Acinetobacter	baumannii	strain=31FS3-2
GCA_013394285.1	1	1	1	1	1	1	1	1	0	GCA_013394285.1	Acinetobacter	baumannii	strain=29FS20
GCA_013403505.1	1	1	1	1	1	1	1	1	0	GCA_013403505.1	Acinetobacter	baumannii	strain=ATCC	BAA1605
GCA_013416255.1	1	1	1	1	1	1	1	1	0	GCA_013416255.1	Acinetobacter	baumannii	strain=DT0544C
GCA_013416275.1	1	1	1	1	1	1	1	1	0	GCA_013416275.1	Acinetobacter	baumannii	strain=DT01139C
GCA_013787185.1	1	1	1	1	1	1	1	1	0	GCA_013787185.1	Acinetobacter	baumannii	strain=36-1512
GCA_014159355.1	1	0	1	1	1	1	1	1	0	GCA_014159355.1	Acinetobacter	baumannii	strain=WP4-W18-ESBL-11
GCA_014169655.1	1	0	1	1	1	1	1	1	0	GCA_014169655.1	Acinetobacter	baumannii	strain=WP8-W18-ESBL-11
GCA_014171935.1	1	1	1	1	1	1	1	1	0	GCA_014171935.1	Acinetobacter	baumannii	strain=17-84
GCA_014267385.1	0	0	0	0	0	0	0	0	0	GCA_014267385.1	Acinetobacter	baumannii	strain=XYAB2018
GCA_014322245.1	1	0	1	1	1	1	1	1	0	GCA_014322245.1	Acinetobacter	baumannii	strain=DETAB-P2
GCA_014672735.1	1	0	0	0	0	0	0	0	0	GCA_014672735.1	Acinetobacter	baumannii	strain=A118
GCA_014672755.1	1	0	1	1	1	1	1	1	0	GCA_014672755.1	Acinetobacter	baumannii	strain=ATCC	19606
GCA_014672775.1	1	0	1	1	1	1	1	1	0	GCA_014672775.1	Acinetobacter	baumannii	strain=ATCC	17978
GCA_014705785.1	1	0	1	1	1	1	1	1	0	GCA_014705785.1	Acinetobacter	baumannii	strain=CFSAN093709
GCA_014705805.1	1	0	1	1	1	1	1	1	0	GCA_014705805.1	Acinetobacter	baumannii	strain=CFSAN093710
GCA_014705825.1	1	0	1	1	1	1	1	1	0	GCA_014705825.1	Acinetobacter	baumannii	strain=CFSAN093705
GCA_014705845.1	1	0	1	1	1	1	1	1	0	GCA_014705845.1	Acinetobacter	baumannii	strain=CFSAN093706
GCA_014705865.1	1	0	1	1	1	1	1	1	0	GCA_014705865.1	Acinetobacter	baumannii	strain=CFSAN093707
GCA_014705885.1	1	0	1	1	1	1	1	1	0	GCA_014705885.1	Acinetobacter	baumannii	strain=CFSAN093708
GCA_014705985.1	1	0	1	0	0	1	0	0	0	GCA_014705985.1	Acinetobacter	baumannii	strain=XH1344
GCA_014874575.1	1	1	1	1	1	1	1	1	0	GCA_014874575.1	Acinetobacter	baumannii	strain=AC1633
GCA_015356075.1	0	0	0	0	0	0	0	0	0	GCA_015356075.1	Acinetobacter	baumannii	strain=SD
GCA_015571935.1	1	0	1	1	1	1	1	1	0	GCA_015571935.1	Acinetobacter	baumannii	strain=Res13-Abat-PEA21-P4-01-A
GCA_015732435.1	0	0	0	0	0	0	0	0	0	GCA_015732435.1	Acinetobacter	baumannii	strain=abA1
GCA_015870765.1	1	0	1	1	1	1	1	1	0	GCA_015870765.1	Acinetobacter	baumannii	strain=TP2
GCA_015870965.1	1	0	1	1	1	1	1	1	0	GCA_015870965.1	Acinetobacter	baumannii	strain=TP3
GCA_015910475.1	1	0	1	1	1	1	1	1	0	GCA_015910475.1	Acinetobacter	baumannii	strain=ATCC	17961
GCA_016127515.1	1	0	1	1	1	1	1	1	0	GCA_016127515.1	Acinetobacter	baumannii	strain=FDAARGOS_1036
GCA_016350005.1	1	0	1	1	1	1	1	1	0	GCA_016350005.1	Acinetobacter	baumannii	strain=G20AB011
GCA_016350065.1	1	0	1	1	1	1	1	1	0	GCA_016350065.1	Acinetobacter	baumannii	strain=G20AB010
GCA_016350085.1	1	0	1	1	1	1	1	1	0	GCA_016350085.1	Acinetobacter	baumannii	strain=G20AB007
GCA_016350105.1	1	0	1	1	1	1	1	1	0	GCA_016350105.1	Acinetobacter	baumannii	strain=G20AB009
GCA_016864295.1	1	0	1	1	1	1	1	1	0	GCA_016864295.1	Acinetobacter	baumannii	strain=AbCTX1
GCA_016864315.1	1	0	1	1	1	1	1	1	0	GCA_016864315.1	Acinetobacter	baumannii	strain=AbCTX9
GCA_016864335.1	1	0	1	1	1	1	1	1	0	GCA_016864335.1	Acinetobacter	baumannii	strain=AbCTX5
GCA_016864915.1	1	0	1	1	1	1	1	1	0	GCA_016864915.1	Acinetobacter	baumannii	strain=AbCTX13
GCA_016865465.1	1	0	1	1	1	1	1	1	0	GCA_016865465.1	Acinetobacter	baumannii	strain=NIPH17_0019
GCA_016903135.1	1	0	1	1	1	1	1	1	0	GCA_016903135.1	Acinetobacter	baumannii	strain=FDAARGOS_1360
GCA_016903215.1	1	0	1	1	1	1	1	1	0	GCA_016903215.1	Acinetobacter	baumannii	strain=FDAARGOS_1359
GCA_017096325.1	1	0	1	1	1	1	1	1	0	GCA_017096325.1	Acinetobacter	baumannii	strain=2018BJAB2
GCA_017096345.1	1	0	1	1	1	1	1	1	0	GCA_017096345.1	Acinetobacter	baumannii	strain=2014TJAB1
GCA_017096365.1	1	0	1	1	1	1	1	1	0	GCA_017096365.1	Acinetobacter	baumannii	strain=2018TJAB1
GCA_017096385.1	1	0	1	1	1	1	1	1	0	GCA_017096385.1	Acinetobacter	baumannii	strain=2016LNAB1
GCA_017096405.1	1	0	1	1	1	1	1	1	0	GCA_017096405.1	Acinetobacter	baumannii	strain=2018BJAB1
GCA_017096425.1	1	0	1	1	1	1	1	1	0	GCA_017096425.1	Acinetobacter	baumannii	strain=2014LNAB1
GCA_017098185.1	1	0	1	1	1	1	1	1	0	GCA_017098185.1	Acinetobacter	baumannii	strain=2016BJAB1
GCA_017098205.1	1	0	1	1	1	1	1	1	0	GCA_017098205.1	Acinetobacter	baumannii	strain=2014BJAB1
GCA_017098225.1	1	0	1	1	1	1	1	1	0	GCA_017098225.1	Acinetobacter	baumannii	strain=2018HBAB1
GCA_017098245.1	1	0	1	1	1	1	1	1	0	GCA_017098245.1	Acinetobacter	baumannii	strain=2018HLJAB2
GCA_017098265.1	1	0	1	1	1	1	1	1	0	GCA_017098265.1	Acinetobacter	baumannii	strain=2018HLJAB1
GCA_017639875.1	1	0	1	1	1	1	1	1	0	GCA_017639875.1	Acinetobacter	baumannii	strain=KSK1
GCA_017723975.1	1	0	1	1	1	1	1	1	0	GCA_017723975.1	Acinetobacter	baumannii	strain=KSK6
GCA_017724115.1	1	0	1	1	1	1	1	1	0	GCA_017724115.1	Acinetobacter	baumannii	strain=KSK7
GCA_017724155.1	1	0	1	1	1	1	1	1	0	GCA_017724155.1	Acinetobacter	baumannii	strain=KSK10
GCA_017724195.1	1	0	1	1	1	1	1	1	0	GCA_017724195.1	Acinetobacter	baumannii	strain=KSK11
GCA_017724215.1	1	0	1	1	1	1	1	1	0	GCA_017724215.1	Acinetobacter	baumannii	strain=KSK18
GCA_017726495.1	1	0	1	1	1	1	1	1	0	GCA_017726495.1	Acinetobacter	baumannii	strain=KSK19
GCA_017726555.1	1	0	1	1	1	1	1	1	0	GCA_017726555.1	Acinetobacter	baumannii	strain=KSK20
GCA_017726575.1	1	0	1	1	1	1	1	1	0	GCA_017726575.1	Acinetobacter	baumannii	strain=KSK	Sensitive
GCA_017742855.1	1	0	1	1	1	1	1	1	0	GCA_017742855.1	Acinetobacter	baumannii	strain=KSK2
GCA_017753625.1	1	0	1	1	1	1	1	1	0	GCA_017753625.1	Acinetobacter	baumannii	strain=DETAB-E227
GCA_018135585.1	0	0	0	0	0	0	0	0	0	GCA_018135585.1	Acinetobacter	baumannii	strain=DETAB-P39
GCA_900088705.1	1	1	1	1	1	1	1	1	0	GCA_900088705.1	Acinetobacter	baumannii	strain=BAL062
GCA_900093475.1	1	1	1	1	1	1	1	1	0	GCA_900093475.1	Acinetobacter	baumannii	strain=NCTC7364
GCA_900478145.1	1	1	1	1	1	1	1	1	0	GCA_900478145.1	Acinetobacter	baumannii	strain=NCTC13421
GCA_002055515.1	1	1	1	1	1	1	1	1	0	GCA_002055515.1	Acinetobacter	calcoaceticus	strain=CA16
GCA_016939475.1	1	1	1	1	1	1	1	1	0	GCA_016939475.1	Acinetobacter	calcoaceticus	strain=FDAARGOS_1218
GCA_900520355.1	1	1	1	1	1	1	1	1	0	GCA_900520355.1	Acinetobacter	calcoaceticus
GCA_003287015.1	1	1	1	1	1	1	1	0	0	GCA_003287015.1	Moraxella	bovis	strain=Epp63	-300
GCA_016028775.1	1	0	1	0	1	1	1	0	0	GCA_016028775.1	Moraxella	nonliquefaciens	strain=FDAARGOS_869
GCA_016127895.1	1	0	1	0	1	1	1	0	0	GCA_016127895.1	Moraxella	nonliquefaciens	strain=FDAARGOS_1006
GCA_000740455.1	1	1	1	1	0	1	1	0	0	GCA_000740455.1	Moraxella	catarrhalis	strain=25240
GCA_000766665.1	1	1	1	1	0	1	1	0	0	GCA_000766665.1	Moraxella	catarrhalis	strain=25239
GCA_002073215.2	1	1	1	1	0	1	1	0	0	GCA_002073215.2	Moraxella	catarrhalis	strain=FDAARGOS_213
GCA_002080125.1	1	1	1	1	0	1	1	0	0	GCA_002080125.1	Moraxella	catarrhalis	strain=CCRI-195ME
GCA_002984125.1	1	1	1	1	0	1	1	0	0	GCA_002984125.1	Moraxella	catarrhalis	strain=FDAARGOS_304
GCA_003971285.1	1	1	1	1	0	1	1	0	0	GCA_003971285.1	Moraxella	catarrhalis	strain=74P50B1
GCA_003971305.1	1	1	1	1	0	1	1	0	0	GCA_003971305.1	Moraxella	catarrhalis	strain=142P87B1
GCA_003971325.1	1	1	1	1	0	1	1	0	0	GCA_003971325.1	Moraxella	catarrhalis	strain=46P58B1
GCA_003971345.1	1	1	1	1	0	1	1	0	0	GCA_003971345.1	Moraxella	catarrhalis	strain=74P58B1
GCA_003971365.1	1	1	1	1	0	1	1	0	0	GCA_003971365.1	Moraxella	catarrhalis	strain=5P47B2
GCA_900476075.1	1	1	1	1	0	1	1	0	0	GCA_900476075.1	Moraxella	catarrhalis	strain=NCTC11020
GCA_016028715.1	1	0	1	1	0	1	1	0	0	GCA_016028715.1	Neisseria	cinerea	strain=FDAARGOS_871
GCA_900475315.1	1	1	1	1	0	1	1	0	0	GCA_900475315.1	Neisseria	cinerea	strain=NCTC10294
GCA_005221285.1	1	0	1	1	0	1	1	0	0	GCA_005221285.1	Neisseria	flavescens	strain=ATCC	13120
GCA_001047225.1	1	1	1	1	0	1	1	0	0	GCA_001047225.1	Neisseria	gonorrhoeae	strain=FA19
GCA_001047255.1	1	1	1	1	0	1	1	0	0	GCA_001047255.1	Neisseria	gonorrhoeae	strain=FA6140
GCA_001047275.1	1	1	1	1	0	1	1	0	0	GCA_001047275.1	Neisseria	gonorrhoeae	strain=35/02
GCA_001661085.1	1	1	1	1	0	1	1	0	0	GCA_001661085.1	Neisseria	gonorrhoeae	strain=32867
GCA_001661115.1	1	1	1	1	0	1	1	0	0	GCA_001661115.1	Neisseria	gonorrhoeae	strain=34530
GCA_001661135.1	1	1	1	1	0	1	1	0	0	GCA_001661135.1	Neisseria	gonorrhoeae	strain=34769
GCA_002073535.2	1	1	1	1	0	1	1	0	0	GCA_002073535.2	Neisseria	gonorrhoeae	strain=FDAARGOS_204
GCA_002073615.2	1	1	1	1	0	1	1	0	0	GCA_002073615.2	Neisseria	gonorrhoeae	strain=FDAARGOS_205
GCA_002073655.2	1	1	1	1	0	1	1	0	0	GCA_002073655.2	Neisseria	gonorrhoeae	strain=FDAARGOS_207
GCA_003571445.1	1	1	1	1	0	1	1	0	0	GCA_003571445.1	Neisseria	gonorrhoeae	strain=RIVM0610
GCA_003571465.1	1	1	1	1	0	1	1	0	0	GCA_003571465.1	Neisseria	gonorrhoeae	strain=RIVM0640
GCA_003855175.1	1	1	1	1	0	1	1	0	0	GCA_003855175.1	Neisseria	gonorrhoeae	strain=FQ84
GCA_003855195.1	1	1	1	1	0	1	1	0	0	GCA_003855195.1	Neisseria	gonorrhoeae	strain=FQ36
GCA_003855215.1	1	1	1	1	0	1	1	0	0	GCA_003855215.1	Neisseria	gonorrhoeae	strain=FQ48
GCA_003855235.1	1	1	1	1	0	1	1	0	0	GCA_003855235.1	Neisseria	gonorrhoeae	strain=FQ04
GCA_003855295.1	1	1	1	1	0	1	1	0	0	GCA_003855295.1	Neisseria	gonorrhoeae	strain=FQ35
GCA_003855355.1	1	1	1	1	0	1	1	0	0	GCA_003855355.1	Neisseria	gonorrhoeae	strain=FQ20
GCA_003855375.1	1	1	1	1	0	1	1	0	0	GCA_003855375.1	Neisseria	gonorrhoeae	strain=FQ02
GCA_003855415.1	1	1	1	1	0	1	1	0	0	GCA_003855415.1	Neisseria	gonorrhoeae	strain=FQ82
GCA_003855435.1	1	1	1	1	0	1	1	0	0	GCA_003855435.1	Neisseria	gonorrhoeae	strain=FQ01
GCA_004001105.1	1	1	1	1	0	1	1	0	0	GCA_004001105.1	Neisseria	gonorrhoeae	strain=FC428
GCA_004001165.1	1	1	1	1	0	1	1	0	0	GCA_004001165.1	Neisseria	gonorrhoeae	strain=FC460
GCA_004001185.1	1	1	1	1	0	1	1	0	0	GCA_004001185.1	Neisseria	gonorrhoeae	strain=FC498
GCA_004332535.2	1	1	1	1	0	1	1	0	0	GCA_004332535.2	Neisseria	gonorrhoeae	strain=TFG-A2
GCA_004332555.2	1	1	1	1	0	1	1	0	0	GCA_004332555.2	Neisseria	gonorrhoeae	strain=TFG-B2
GCA_007107165.1	1	1	1	1	0	1	1	0	0	GCA_007107165.1	Neisseria	gonorrhoeae	strain=NJ1711654
GCA_007107365.1	1	1	1	1	0	1	1	0	0	GCA_007107365.1	Neisseria	gonorrhoeae	strain=NJ189125
GCA_008065015.2	1	1	1	1	0	1	1	0	0	GCA_008065015.2	Neisseria	gonorrhoeae	strain=SS3160
GCA_009650075.1	1	1	1	1	0	1	1	0	0	GCA_009650075.1	Neisseria	gonorrhoeae	strain=AUSMDU00010541
GCA_011058635.1	1	1	1	1	0	1	1	0	0	GCA_011058635.1	Neisseria	gonorrhoeae	strain=NG290
GCA_011058655.1	1	1	1	1	0	1	1	0	0	GCA_011058655.1	Neisseria	gonorrhoeae	strain=NG251
GCA_011058675.1	1	1	1	1	0	1	1	0	0	GCA_011058675.1	Neisseria	gonorrhoeae	strain=NG196
GCA_013030055.1	1	1	1	1	0	1	1	0	0	GCA_013030055.1	Neisseria	gonorrhoeae	strain=TUM19853
GCA_013030075.1	1	1	1	1	0	1	1	0	0	GCA_013030075.1	Neisseria	gonorrhoeae	strain=TUM19854
GCA_013030095.1	1	1	1	1	0	1	1	0	0	GCA_013030095.1	Neisseria	gonorrhoeae	strain=TUM15748
GCA_013030115.1	1	1	1	1	0	1	1	0	0	GCA_013030115.1	Neisseria	gonorrhoeae	strain=TUM15753
GCA_013030135.1	1	1	1	1	0	1	1	0	0	GCA_013030135.1	Neisseria	gonorrhoeae	strain=TUM16691
GCA_014700555.1	1	0	1	1	0	1	1	0	0	GCA_014700555.1	Neisseria	gonorrhoeae	strain=BJ16148
GCA_015509285.1	1	0	1	1	0	1	1	0	0	GCA_015509285.1	Neisseria	gonorrhoeae	strain=TUM	19855
GCA_016775785.1	1	0	1	1	0	1	1	0	0	GCA_016775785.1	Neisseria	gonorrhoeae	strain=20181204
GCA_016802315.1	0	0	0	0	0	0	0	0	0	GCA_016802315.1	Neisseria	gonorrhoeae	strain=SRRSH240
GCA_016802335.1	0	0	0	0	0	0	0	0	0	GCA_016802335.1	Neisseria	gonorrhoeae	strain=SRRSH229
GCA_016802355.1	0	0	0	0	0	0	0	0	0	GCA_016802355.1	Neisseria	gonorrhoeae	strain=SRRSH214
GCA_016802385.1	0	0	0	0	0	0	0	0	0	GCA_016802385.1	Neisseria	gonorrhoeae	strain=SRRSH207
GCA_016802405.1	0	0	0	0	0	0	0	0	0	GCA_016802405.1	Neisseria	gonorrhoeae	strain=SRRSH205
GCA_016802425.1	0	0	0	0	0	0	0	0	0	GCA_016802425.1	Neisseria	gonorrhoeae	strain=SRRSH204
GCA_016802445.1	0	0	0	0	0	0	0	0	0	GCA_016802445.1	Neisseria	gonorrhoeae	strain=SRRSH203
GCA_900087615.2	1	1	1	1	0	1	1	0	0	GCA_900087615.2	Neisseria	gonorrhoeae	strain=WHO	M
GCA_900087625.2	1	1	1	1	0	1	1	0	0	GCA_900087625.2	Neisseria	gonorrhoeae	strain=WHO	O
GCA_900087635.2	1	1	1	1	0	1	1	0	0	GCA_900087635.2	Neisseria	gonorrhoeae	strain=WHO	F
GCA_900087645.2	1	1	1	1	0	1	1	0	0	GCA_900087645.2	Neisseria	gonorrhoeae	strain=WHO_W
GCA_900087685.2	1	1	1	1	0	1	1	0	0	GCA_900087685.2	Neisseria	gonorrhoeae	strain=WHO_Y
GCA_900087715.2	1	1	1	1	0	1	1	0	0	GCA_900087715.2	Neisseria	gonorrhoeae	strain=WHO_Z
GCA_900087725.2	1	1	1	1	0	1	1	0	0	GCA_900087725.2	Neisseria	gonorrhoeae	strain=WHO	N
GCA_900087735.2	1	1	1	1	0	1	1	0	0	GCA_900087735.2	Neisseria	gonorrhoeae	strain=WHO	P
GCA_900087785.2	1	1	1	1	0	1	1	0	0	GCA_900087785.2	Neisseria	gonorrhoeae	strain=WHO	G
GCA_900087795.2	1	1	1	1	0	1	1	0	0	GCA_900087795.2	Neisseria	gonorrhoeae	strain=WHO_V
GCA_900087815.2	1	1	1	1	0	1	1	0	0	GCA_900087815.2	Neisseria	gonorrhoeae	strain=WHO_X
GCA_900087865.2	1	1	1	1	0	1	1	0	0	GCA_900087865.2	Neisseria	gonorrhoeae	strain=WHO	K
GCA_900087875.2	1	1	1	1	0	1	1	0	0	GCA_900087875.2	Neisseria	gonorrhoeae	strain=WHO	L
GCA_900087905.2	1	1	1	1	0	1	1	0	0	GCA_900087905.2	Neisseria	gonorrhoeae	strain=WHO_U
GCA_900186875.1	1	1	1	1	0	1	1	0	0	GCA_900186875.1	Neisseria	gonorrhoeae	strain=NCTC13798
GCA_900186915.1	1	1	1	1	0	1	1	0	0	GCA_900186915.1	Neisseria	gonorrhoeae	strain=NCTC13800
GCA_900186935.1	1	1	1	1	0	1	1	0	0	GCA_900186935.1	Neisseria	gonorrhoeae	strain=NCTC13799
GCA_900637245.1	1	1	1	1	0	1	1	0	0	GCA_900637245.1	Neisseria	gonorrhoeae	strain=NCTC13484
GCA_002022745.1	1	1	1	1	0	1	1	0	0	GCA_002022745.1	Neisseria	lactamica	strain=Y92-1009
GCA_003351565.1	0	0	0	0	0	0	0	0	0	GCA_003351565.1	Neisseria	lactamica	strain=M17106
GCA_901482445.1	1	1	1	1	0	1	1	0	0	GCA_901482445.1	Neisseria	lactamica	strain=NCTC10617
GCA_000626595.1	1	1	1	1	0	1	1	0	0	GCA_000626595.1	Neisseria	meningitidis	strain=510612
GCA_000787195.2	1	1	1	1	0	1	1	0	0	GCA_000787195.2	Neisseria	meningitidis	strain=L91543
GCA_000800235.1	1	1	1	1	0	1	1	0	0	GCA_000800235.1	Neisseria	meningitidis	strain=NM3686
GCA_000800315.1	1	1	1	1	0	1	1	0	0	GCA_000800315.1	Neisseria	meningitidis	strain=NM3682
GCA_000800355.1	1	1	1	1	0	1	1	0	0	GCA_000800355.1	Neisseria	meningitidis	strain=NM3683
GCA_000800415.1	1	1	1	1	0	1	1	0	0	GCA_000800415.1	Neisseria	meningitidis	strain=M10208
GCA_001029815.1	1	1	1	1	0	1	1	0	0	GCA_001029815.1	Neisseria	meningitidis	strain=B6116/77
GCA_001697105.1	1	1	1	1	0	1	1	0	0	GCA_001697105.1	Neisseria	meningitidis	strain=DE8669
GCA_001697125.1	1	1	1	1	0	1	1	0	0	GCA_001697125.1	Neisseria	meningitidis	strain=DE10444
GCA_001697165.1	1	1	1	1	0	1	1	0	0	GCA_001697165.1	Neisseria	meningitidis	strain=DE8555
GCA_001697205.1	1	1	1	1	0	1	1	0	0	GCA_001697205.1	Neisseria	meningitidis	strain=WUE2121
GCA_001697305.1	1	1	1	1	0	1	1	0	0	GCA_001697305.1	Neisseria	meningitidis	strain=M22718
GCA_001697325.1	1	1	1	1	0	1	1	0	0	GCA_001697325.1	Neisseria	meningitidis	strain=M12752
GCA_001697345.1	1	1	1	1	0	1	1	0	0	GCA_001697345.1	Neisseria	meningitidis	strain=M22819
GCA_001697365.1	1	1	1	1	0	1	1	0	0	GCA_001697365.1	Neisseria	meningitidis	strain=M22809
GCA_001697385.1	1	1	1	1	0	1	1	0	0	GCA_001697385.1	Neisseria	meningitidis	strain=M09293
GCA_001697405.1	1	1	1	1	0	1	1	0	0	GCA_001697405.1	Neisseria	meningitidis	strain=M22189
GCA_001697425.1	1	1	1	1	0	1	1	0	0	GCA_001697425.1	Neisseria	meningitidis	strain=M07149
GCA_001697445.1	1	1	1	1	0	1	1	0	0	GCA_001697445.1	Neisseria	meningitidis	strain=M25474
GCA_001697465.1	1	1	1	1	0	1	1	0	0	GCA_001697465.1	Neisseria	meningitidis	strain=M08001
GCA_001697485.1	1	1	1	1	0	1	1	0	0	GCA_001697485.1	Neisseria	meningitidis	strain=M22748
GCA_001697505.1	1	1	1	1	0	1	1	0	0	GCA_001697505.1	Neisseria	meningitidis	strain=M22811
GCA_001697525.1	1	1	1	1	0	1	1	0	0	GCA_001697525.1	Neisseria	meningitidis	strain=M22772
GCA_001697545.1	1	1	1	1	0	1	1	0	0	GCA_001697545.1	Neisseria	meningitidis	strain=M22769
GCA_001697565.1	1	1	1	1	0	1	1	0	0	GCA_001697565.1	Neisseria	meningitidis	strain=M22745
GCA_001697585.1	1	1	1	1	0	1	1	0	0	GCA_001697585.1	Neisseria	meningitidis	strain=M24730
GCA_001697605.1	1	1	1	1	0	1	1	0	0	GCA_001697605.1	Neisseria	meningitidis	strain=M22801
GCA_001697625.1	1	1	1	1	0	1	1	0	0	GCA_001697625.1	Neisseria	meningitidis	strain=M22804
GCA_001697645.1	1	1	1	1	0	1	1	0	0	GCA_001697645.1	Neisseria	meningitidis	strain=M25438
GCA_001697665.1	1	1	1	1	0	1	1	0	0	GCA_001697665.1	Neisseria	meningitidis	strain=M23413
GCA_001697685.1	1	1	1	1	0	1	1	0	0	GCA_001697685.1	Neisseria	meningitidis	strain=M22722
GCA_001697705.1	1	1	1	1	0	1	1	0	0	GCA_001697705.1	Neisseria	meningitidis	strain=M25070
GCA_001697725.1	1	1	1	1	0	1	1	0	0	GCA_001697725.1	Neisseria	meningitidis	strain=M09261
GCA_001697745.1	1	1	1	1	0	1	1	0	0	GCA_001697745.1	Neisseria	meningitidis	strain=M25462
GCA_001697765.1	1	1	1	1	0	1	1	0	0	GCA_001697765.1	Neisseria	meningitidis	strain=M27559
GCA_001697785.1	1	1	1	1	0	1	1	0	0	GCA_001697785.1	Neisseria	meningitidis	strain=M25472
GCA_001697805.1	1	1	1	1	0	1	1	0	0	GCA_001697805.1	Neisseria	meningitidis	strain=M22759
GCA_001697825.1	1	1	1	1	0	1	1	0	0	GCA_001697825.1	Neisseria	meningitidis	strain=M25087
GCA_001697845.1	1	1	1	1	0	1	1	0	0	GCA_001697845.1	Neisseria	meningitidis	strain=M22783
GCA_001697865.1	1	1	1	1	0	1	1	0	0	GCA_001697865.1	Neisseria	meningitidis	strain=M22828
GCA_001697885.1	1	1	1	1	0	1	1	0	0	GCA_001697885.1	Neisseria	meningitidis	strain=M25459
GCA_001697905.1	1	1	1	1	0	1	1	0	0	GCA_001697905.1	Neisseria	meningitidis	strain=M22160
GCA_001697925.1	1	1	1	1	0	1	1	0	0	GCA_001697925.1	Neisseria	meningitidis	strain=M07161
GCA_001697945.1	1	1	1	1	0	1	1	0	0	GCA_001697945.1	Neisseria	meningitidis	strain=M25476
GCA_001697965.1	1	1	1	1	0	1	1	0	0	GCA_001697965.1	Neisseria	meningitidis	strain=M25456
GCA_001697985.1	1	1	1	1	0	1	1	0	0	GCA_001697985.1	Neisseria	meningitidis	strain=M25419
GCA_001698005.1	1	1	1	1	0	1	1	0	0	GCA_001698005.1	Neisseria	meningitidis	strain=M22740
GCA_001698025.1	1	1	1	1	0	1	1	0	0	GCA_001698025.1	Neisseria	meningitidis	strain=M22822
GCA_001698045.1	1	1	1	1	0	1	1	0	0	GCA_001698045.1	Neisseria	meningitidis	strain=M07162
GCA_001698065.1	1	1	1	1	0	1	1	0	0	GCA_001698065.1	Neisseria	meningitidis	strain=M08000
GCA_001698085.1	1	1	1	1	0	1	1	0	0	GCA_001698085.1	Neisseria	meningitidis	strain=M24705
GCA_001698105.1	1	1	1	1	0	1	1	0	0	GCA_001698105.1	Neisseria	meningitidis	strain=M22191
GCA_001750825.1	1	1	1	1	0	1	1	0	0	GCA_001750825.1	Neisseria	meningitidis	strain=331401
GCA_001974965.1	1	1	1	1	0	1	1	0	0	GCA_001974965.1	Neisseria	meningitidis	strain=38277
GCA_002073235.2	1	1	1	1	0	1	1	0	0	GCA_002073235.2	Neisseria	meningitidis	strain=FDAARGOS_214
GCA_002073275.2	1	1	1	1	0	1	1	0	0	GCA_002073275.2	Neisseria	meningitidis	strain=FDAARGOS_215
GCA_002073555.2	1	1	1	1	0	1	1	0	0	GCA_002073555.2	Neisseria	meningitidis	strain=FDAARGOS_211
GCA_002073575.2	1	1	1	1	0	1	1	0	0	GCA_002073575.2	Neisseria	meningitidis	strain=FDAARGOS_209
GCA_002073595.2	1	1	1	1	0	1	1	0	0	GCA_002073595.2	Neisseria	meningitidis	strain=FDAARGOS_210
GCA_002073675.2	1	1	1	1	0	1	1	0	0	GCA_002073675.2	Neisseria	meningitidis	strain=FDAARGOS_212
GCA_002075815.1	1	1	1	1	0	1	1	0	0	GCA_002075815.1	Neisseria	meningitidis	strain=COL-201504-11
GCA_002556585.1	1	1	1	1	0	1	1	0	0	GCA_002556585.1	Neisseria	meningitidis	strain=M26417
GCA_002951575.1	1	1	1	1	0	1	1	0	0	GCA_002951575.1	Neisseria	meningitidis	strain=M21273
GCA_003355215.1	0	0	0	0	0	0	0	0	0	GCA_003355215.1	Neisseria	meningitidis	strain=M22293
GCA_003355235.1	0	0	0	0	0	0	0	0	0	GCA_003355235.1	Neisseria	meningitidis	strain=M25964
GCA_003355255.1	0	0	0	0	0	0	0	0	0	GCA_003355255.1	Neisseria	meningitidis	strain=M21717
GCA_003355275.1	0	0	0	0	0	0	0	0	0	GCA_003355275.1	Neisseria	meningitidis	strain=M26263
GCA_003355295.1	0	0	0	0	0	0	0	0	0	GCA_003355295.1	Neisseria	meningitidis	strain=M22814
GCA_003355315.1	0	0	0	0	0	0	0	0	0	GCA_003355315.1	Neisseria	meningitidis	strain=M23347
GCA_003355335.1	0	0	0	0	0	0	0	0	0	GCA_003355335.1	Neisseria	meningitidis	strain=M21374
GCA_003355375.1	0	0	0	0	0	0	0	0	0	GCA_003355375.1	Neisseria	meningitidis	strain=M18755
GCA_003355395.1	0	0	0	0	0	0	0	0	0	GCA_003355395.1	Neisseria	meningitidis	strain=M22425
GCA_003355415.1	0	0	0	0	0	0	0	0	0	GCA_003355415.1	Neisseria	meningitidis	strain=M21955
GCA_003355435.1	0	0	0	0	0	0	0	0	0	GCA_003355435.1	Neisseria	meningitidis	strain=M18727
GCA_008329765.1	1	1	1	1	0	1	1	0	0	GCA_008329765.1	Neisseria	meningitidis	strain=12-221
GCA_008330745.1	1	1	1	1	0	1	1	0	0	GCA_008330745.1	Neisseria	meningitidis	strain=14-563
GCA_008330765.1	1	1	1	1	0	1	1	0	0	GCA_008330765.1	Neisseria	meningitidis	strain=12-176
GCA_008330785.1	1	1	1	1	0	1	1	0	0	GCA_008330785.1	Neisseria	meningitidis	strain=11-14
GCA_008330805.1	1	1	1	1	0	1	1	0	0	GCA_008330805.1	Neisseria	meningitidis	strain=11-7
GCA_008330825.1	1	1	1	1	0	1	1	0	0	GCA_008330825.1	Neisseria	meningitidis	strain=09-292
GCA_008330845.1	1	1	1	1	0	1	1	0	0	GCA_008330845.1	Neisseria	meningitidis	strain=06-178
GCA_008330865.1	1	1	1	1	0	1	1	0	0	GCA_008330865.1	Neisseria	meningitidis	strain=98-182
GCA_008330885.1	1	1	1	1	0	1	1	0	0	GCA_008330885.1	Neisseria	meningitidis	strain=95-134
GCA_008330905.1	1	1	1	1	0	1	1	0	0	GCA_008330905.1	Neisseria	meningitidis	strain=12-330
GCA_008330925.1	1	1	1	1	0	1	1	0	0	GCA_008330925.1	Neisseria	meningitidis	strain=13-600
GCA_009664675.1	1	1	1	1	0	1	1	0	0	GCA_009664675.1	Neisseria	meningitidis	strain=AUSMDU00005726
GCA_009664695.1	1	1	1	1	0	1	1	0	0	GCA_009664695.1	Neisseria	meningitidis	strain=AUSMDU00010537
GCA_014302495.1	1	0	1	1	0	1	1	0	0	GCA_014302495.1	Neisseria	meningitidis	strain=LNP24198
GCA_015679665.1	1	0	1	1	0	1	1	0	0	GCA_015679665.1	Neisseria	meningitidis	strain=16-579
GCA_015679705.1	1	0	1	0	0	1	1	0	0	GCA_015679705.1	Neisseria	meningitidis	strain=16-306
GCA_015679735.1	1	0	1	1	0	1	1	0	0	GCA_015679735.1	Neisseria	meningitidis	strain=16-92
GCA_015679775.1	1	0	1	1	0	1	1	0	0	GCA_015679775.1	Neisseria	meningitidis	strain=16-7
GCA_015679795.1	1	0	1	1	0	1	1	0	0	GCA_015679795.1	Neisseria	meningitidis	strain=15-236
GCA_015679815.1	1	0	1	1	0	1	1	0	0	GCA_015679815.1	Neisseria	meningitidis	strain=15-215
GCA_015679845.1	1	0	1	1	0	1	1	0	0	GCA_015679845.1	Neisseria	meningitidis	strain=15-198
GCA_015679865.1	1	0	1	1	0	1	1	0	0	GCA_015679865.1	Neisseria	meningitidis	strain=14-627
GCA_015679885.1	1	0	1	1	0	1	1	0	0	GCA_015679885.1	Neisseria	meningitidis	strain=14-159
GCA_015679905.1	1	0	1	1	0	1	1	0	0	GCA_015679905.1	Neisseria	meningitidis	strain=12-208
GCA_015679925.1	1	0	1	1	0	1	1	0	0	GCA_015679925.1	Neisseria	meningitidis	strain=11-251
GCA_015732665.1	1	0	1	0	0	1	1	0	0	GCA_015732665.1	Neisseria	meningitidis	strain=15-193
GCA_015732685.1	1	0	1	1	0	1	1	0	0	GCA_015732685.1	Neisseria	meningitidis	strain=15-123
GCA_016026895.1	1	0	1	1	0	1	1	0	0	GCA_016026895.1	Neisseria	meningitidis	strain=FDAARGOS_914
GCA_017347365.1	1	0	1	1	0	1	1	0	0	GCA_017347365.1	Neisseria	meningitidis	strain=NIID777
GCA_900638555.1	1	1	1	1	0	1	1	0	0	GCA_900638555.1	Neisseria	meningitidis	strain=NCTC10025
GCA_900638575.1	1	1	1	1	0	1	1	0	0	GCA_900638575.1	Neisseria	meningitidis	strain=NCTC3372
GCA_900638595.1	1	1	1	1	0	1	1	0	0	GCA_900638595.1	Neisseria	meningitidis	strain=NCTC12163
GCA_900638605.1	1	1	1	1	0	1	1	0	0	GCA_900638605.1	Neisseria	meningitidis	strain=NCTC10026
GCA_002073715.2	1	0	1	1	0	1	1	0	0	GCA_002073715.2	Neisseria	mucosa	strain=FDAARGOS_260
GCA_003028315.1	1	0	1	1	0	1	1	0	0	GCA_003028315.1	Neisseria	mucosa	strain=ATCC	19696
GCA_013267835.1	1	0	1	1	0	1	1	0	0	GCA_013267835.1	Neisseria	mucosa	strain=FDAARGOS_758
GCA_003355195.1	0	0	0	0	0	0	0	0	0	GCA_003355195.1	Neisseria	polysaccharea	strain=M18661
GCA_014054945.1	1	1	1	1	0	1	1	0	0	GCA_014054945.1	Neisseria	sicca	strain=DSM	17713
GCA_017753665.1	1	1	1	1	0	1	1	0	0	GCA_017753665.1	Neisseria	sicca	strain=NS20201025
GCA_008806995.1	1	0	1	1	0	1	1	0	0	GCA_008806995.1	Neisseria	animalis	strain=ATCC	49930
GCA_900636515.1	1	0	1	1	0	1	1	0	0	GCA_900636515.1	Neisseria	animalis	strain=NCTC10212
GCA_900636765.1	1	1	1	1	0	1	1	0	0	GCA_900636765.1	Neisseria	canis	strain=NCTC10296
GCA_003351545.1	0	0	0	0	0	0	0	0	0	GCA_003351545.1	Neisseria	elongata	strain=M15911
GCA_003351685.1	0	0	0	0	0	0	0	0	0	GCA_003351685.1	Neisseria	elongata	strain=M15910
GCA_016127355.1	1	0	1	1	0	1	1	0	0	GCA_016127355.1	Kingella	denitrificans	strain=FDAARGOS_1060
GCA_001458475.1	1	1	1	1	0	1	1	0	0	GCA_001458475.1	Kingella	kingae	strain=KWG1
GCA_011045755.1	1	1	1	1	0	1	1	0	0	GCA_011045755.1	Kingella	kingae	strain=F41215CHC
GCA_011612385.1	1	1	1	1	0	1	1	0	0	GCA_011612385.1	Kingella	kingae	strain=ATCC	23332
GCA_011612705.1	1	1	1	1	0	1	1	0	0	GCA_011612705.1	Kingella	kingae	strain=ATCC	23331
GCA_900475905.1	1	1	1	1	0	1	1	0	0	GCA_900475905.1	Kingella	kingae	strain=NCTC10529
GCA_014054985.1	1	0	1	1	0	1	1	0	0	GCA_014054985.1	Kingella	oralis	strain=DSM	18271
GCA_000967305.2	1	1	1	1	1	1	1	1	0	GCA_000967305.2	Alcaligenes	faecalis	strain=ZD02
GCA_001641975.2	1	1	1	1	1	1	1	1	0	GCA_001641975.2	Alcaligenes	faecalis	strain=P156
GCA_002242175.1	1	1	1	1	1	1	1	1	0	GCA_002242175.1	Alcaligenes	faecalis	strain=JQ135
GCA_002443155.1	1	1	1	1	1	1	1	1	0	GCA_002443155.1	Alcaligenes	faecalis	strain=DSM	30030
GCA_003716855.1	1	0	1	1	1	1	1	1	0	GCA_003716855.1	Alcaligenes	faecalis	strain=J481
GCA_003813085.1	1	1	1	1	1	1	1	1	0	GCA_003813085.1	Alcaligenes	faecalis	strain=FDAARGOS_491
GCA_004319585.1	1	1	1	1	1	1	1	1	0	GCA_004319585.1	Alcaligenes	faecalis	strain=AN70
GCA_010092625.1	1	1	1	1	1	1	1	1	0	GCA_010092625.1	Alcaligenes	faecalis	strain=MUB14
GCA_016128035.1	1	1	1	1	1	1	1	1	0	GCA_016128035.1	Alcaligenes	faecalis	strain=FDAARGOS_1024
GCA_016446305.1	0	0	0	0	0	0	0	0	0	GCA_016446305.1	Alcaligenes	faecalis	strain=SCSIO	B001
GCA_016807785.1	1	1	1	1	1	1	1	1	0	GCA_016807785.1	Alcaligenes	faecalis	strain=c16
GCA_000829175.1	1	1	1	1	1	1	1	1	0	GCA_000829175.1	Bordetella	bronchiseptica	strain=S798
GCA_001559055.2	1	1	1	1	1	1	1	1	0	GCA_001559055.2	Bordetella	bronchiseptica	strain=FDAARGOS_176
GCA_001704355.1	1	1	1	1	1	1	1	1	0	GCA_001704355.1	Bordetella	bronchiseptica	strain=I328
GCA_002859225.1	1	0	1	1	1	1	1	1	0	GCA_002859225.1	Bordetella	bronchiseptica	strain=A310
GCA_003184465.1	1	1	1	1	1	1	1	1	0	GCA_003184465.1	Bordetella	bronchiseptica	strain=F709
GCA_003184485.1	1	1	1	1	1	1	1	1	0	GCA_003184485.1	Bordetella	bronchiseptica	strain=D973
GCA_003186185.1	1	1	1	1	1	1	1	1	0	GCA_003186185.1	Bordetella	bronchiseptica	strain=E010
GCA_003186205.1	1	1	1	1	1	1	1	1	0	GCA_003186205.1	Bordetella	bronchiseptica	strain=E001
GCA_003186595.1	1	0	1	1	1	1	1	1	0	GCA_003186595.1	Bordetella	bronchiseptica	strain=I943
GCA_003186685.1	1	1	1	1	1	1	1	1	0	GCA_003186685.1	Bordetella	bronchiseptica	strain=D755
GCA_003443855.2	1	1	1	1	1	1	1	1	0	GCA_003443855.2	Bordetella	bronchiseptica	strain=KM22
GCA_004006735.1	1	1	1	1	1	1	1	1	0	GCA_004006735.1	Bordetella	bronchiseptica	strain=D448
GCA_004006815.1	1	1	1	1	1	1	1	1	0	GCA_004006815.1	Bordetella	bronchiseptica	strain=A345
GCA_004006935.1	1	1	1	1	1	1	1	1	0	GCA_004006935.1	Bordetella	bronchiseptica	strain=D987
GCA_004008095.1	1	1	1	1	1	1	1	1	0	GCA_004008095.1	Bordetella	bronchiseptica	strain=I124
GCA_004634565.1	1	1	1	1	1	1	1	1	0	GCA_004634565.1	Bordetella	bronchiseptica	strain=E016
GCA_008693665.1	1	1	1	1	1	1	1	1	0	GCA_008693665.1	Bordetella	bronchiseptica	strain=FDAARGOS_634
GCA_011305335.1	0	0	0	0	0	0	0	0	0	GCA_011305335.1	Bordetella	bronchiseptica	strain=KVNON-570
GCA_900636925.1	1	1	1	1	1	1	1	1	0	GCA_900636925.1	Bordetella	bronchiseptica	strain=NCTC10543
GCA_900637995.1	1	1	1	1	1	1	1	1	0	GCA_900637995.1	Bordetella	bronchiseptica	strain=NCTC8344
GCA_001704255.1	1	1	1	1	1	1	1	1	0	GCA_001704255.1	Bordetella	parapertussis	strain=H904
GCA_002859965.1	1	1	1	1	1	1	1	1	0	GCA_002859965.1	Bordetella	parapertussis
GCA_003186225.1	1	1	1	1	1	1	1	1	0	GCA_003186225.1	Bordetella	parapertussis	strain=D577
GCA_003186265.1	1	1	1	1	1	1	1	1	0	GCA_003186265.1	Bordetella	parapertussis	strain=A747
GCA_003186285.1	1	1	1	1	1	1	1	1	0	GCA_003186285.1	Bordetella	parapertussis	strain=I440
GCA_003186305.1	1	1	1	1	1	1	1	1	0	GCA_003186305.1	Bordetella	parapertussis	strain=E738
GCA_003186765.1	1	1	1	1	1	1	1	1	0	GCA_003186765.1	Bordetella	parapertussis	strain=B337
GCA_004007035.1	1	1	1	1	1	1	1	1	0	GCA_004007035.1	Bordetella	parapertussis	strain=F585
GCA_004008035.1	1	1	1	1	1	1	1	1	0	GCA_004008035.1	Bordetella	parapertussis	strain=B271
GCA_004008155.1	1	1	1	1	1	1	1	1	0	GCA_004008155.1	Bordetella	parapertussis	strain=B144
GCA_004008215.1	1	1	1	1	1	1	1	1	0	GCA_004008215.1	Bordetella	parapertussis	strain=B160
GCA_004008295.1	1	1	1	1	1	1	1	1	0	GCA_004008295.1	Bordetella	parapertussis	strain=A005
GCA_004008355.1	1	1	1	1	1	1	1	1	0	GCA_004008355.1	Bordetella	parapertussis	strain=B149
GCA_004323615.1	1	1	1	1	1	1	1	1	0	GCA_004323615.1	Bordetella	parapertussis	strain=Bpp01
GCA_004634505.1	1	1	1	1	1	1	1	1	0	GCA_004634505.1	Bordetella	parapertussis	strain=E843
GCA_004634525.1	1	1	1	1	1	1	1	1	0	GCA_004634525.1	Bordetella	parapertussis	strain=E762
GCA_009625735.1	1	1	1	1	1	1	1	1	0	GCA_009625735.1	Bordetella	parapertussis	strain=J859
GCA_009625755.1	1	1	1	1	1	1	1	1	0	GCA_009625755.1	Bordetella	parapertussis	strain=J835
GCA_009625775.1	1	1	1	1	1	1	1	1	0	GCA_009625775.1	Bordetella	parapertussis	strain=J792
GCA_009625795.1	1	1	1	1	1	1	1	1	0	GCA_009625795.1	Bordetella	parapertussis	strain=J786
GCA_009625835.1	1	1	1	1	1	1	1	1	0	GCA_009625835.1	Bordetella	parapertussis	strain=J711
GCA_009625875.1	1	1	1	1	1	1	1	1	0	GCA_009625875.1	Bordetella	parapertussis	strain=J676
GCA_009625895.1	1	1	1	1	1	1	1	1	0	GCA_009625895.1	Bordetella	parapertussis	strain=J611
GCA_009625915.1	1	1	1	1	1	1	1	1	0	GCA_009625915.1	Bordetella	parapertussis	strain=J602
GCA_009625935.1	1	1	1	1	1	1	1	1	0	GCA_009625935.1	Bordetella	parapertussis	strain=J599
GCA_009625955.1	1	1	1	1	1	1	1	1	0	GCA_009625955.1	Bordetella	parapertussis	strain=J593
GCA_009625975.1	1	1	1	1	1	1	1	1	0	GCA_009625975.1	Bordetella	parapertussis	strain=J456
GCA_009625995.1	1	1	1	1	1	1	1	1	0	GCA_009625995.1	Bordetella	parapertussis	strain=J396
GCA_009626015.1	1	1	1	1	1	1	1	1	0	GCA_009626015.1	Bordetella	parapertussis	strain=J327
GCA_009626035.1	1	1	1	1	1	1	1	1	0	GCA_009626035.1	Bordetella	parapertussis	strain=J328
GCA_009626055.1	1	1	1	1	1	1	1	1	0	GCA_009626055.1	Bordetella	parapertussis	strain=J326
GCA_009626075.1	1	1	1	1	1	1	1	1	0	GCA_009626075.1	Bordetella	parapertussis	strain=J324
GCA_009626115.1	1	1	1	1	1	1	1	1	0	GCA_009626115.1	Bordetella	parapertussis	strain=J307
GCA_009626135.1	1	1	1	1	1	1	1	1	0	GCA_009626135.1	Bordetella	parapertussis	strain=J297
GCA_009626155.1	1	1	1	1	1	1	1	1	0	GCA_009626155.1	Bordetella	parapertussis	strain=J293
GCA_009626175.1	1	1	1	1	1	1	1	1	0	GCA_009626175.1	Bordetella	parapertussis	strain=J292
GCA_009626195.1	1	1	1	1	1	1	1	1	0	GCA_009626195.1	Bordetella	parapertussis	strain=J291
GCA_009626215.1	1	1	1	1	1	1	1	1	0	GCA_009626215.1	Bordetella	parapertussis	strain=J290
GCA_009626235.1	1	1	1	1	1	1	1	1	0	GCA_009626235.1	Bordetella	parapertussis	strain=J289
GCA_009626255.1	1	1	1	1	1	1	1	1	0	GCA_009626255.1	Bordetella	parapertussis	strain=J287
GCA_009626275.1	1	1	1	1	1	1	1	1	0	GCA_009626275.1	Bordetella	parapertussis	strain=J284
GCA_009626295.1	1	1	1	1	1	1	1	1	0	GCA_009626295.1	Bordetella	parapertussis	strain=J282
GCA_009626315.1	1	1	1	1	1	1	1	1	0	GCA_009626315.1	Bordetella	parapertussis	strain=J281
GCA_009626335.1	1	1	1	1	1	1	1	1	0	GCA_009626335.1	Bordetella	parapertussis	strain=J280
GCA_009626355.1	1	1	1	1	1	1	1	1	0	GCA_009626355.1	Bordetella	parapertussis	strain=J279
GCA_009626375.1	1	1	1	1	1	1	1	1	0	GCA_009626375.1	Bordetella	parapertussis	strain=J278
GCA_009626395.1	1	1	1	1	1	1	1	1	0	GCA_009626395.1	Bordetella	parapertussis	strain=J221
GCA_009626415.1	1	1	1	1	1	1	1	1	0	GCA_009626415.1	Bordetella	parapertussis	strain=J220
GCA_009626435.1	1	1	1	1	1	1	1	1	0	GCA_009626435.1	Bordetella	parapertussis	strain=J219
GCA_009626455.1	1	1	1	1	1	1	1	1	0	GCA_009626455.1	Bordetella	parapertussis	strain=J217
GCA_009626495.1	1	1	1	1	1	1	1	1	0	GCA_009626495.1	Bordetella	parapertussis	strain=J166
GCA_009626515.1	1	1	1	1	1	1	1	1	0	GCA_009626515.1	Bordetella	parapertussis	strain=J158
GCA_009626535.1	1	1	1	1	1	1	1	1	0	GCA_009626535.1	Bordetella	parapertussis	strain=J156
GCA_009626555.1	1	1	1	1	1	1	1	1	0	GCA_009626555.1	Bordetella	parapertussis	strain=J116
GCA_009626595.1	1	1	1	1	1	1	1	1	0	GCA_009626595.1	Bordetella	parapertussis	strain=J069
GCA_009626615.1	1	1	1	1	1	1	1	1	0	GCA_009626615.1	Bordetella	parapertussis	strain=I962
GCA_009626635.1	1	1	1	1	1	1	1	1	0	GCA_009626635.1	Bordetella	parapertussis	strain=I768
GCA_009626655.1	1	1	1	1	1	1	1	1	0	GCA_009626655.1	Bordetella	parapertussis	strain=I458
GCA_009626675.1	1	1	1	1	1	1	1	1	0	GCA_009626675.1	Bordetella	parapertussis	strain=I457
GCA_009626695.1	1	1	1	1	1	1	1	1	0	GCA_009626695.1	Bordetella	parapertussis	strain=I326
GCA_009626715.1	1	1	1	1	1	1	1	1	0	GCA_009626715.1	Bordetella	parapertussis	strain=I325
GCA_009626735.1	1	1	1	1	1	1	1	1	0	GCA_009626735.1	Bordetella	parapertussis	strain=I308
GCA_009626755.1	1	1	1	1	1	1	1	1	0	GCA_009626755.1	Bordetella	parapertussis	strain=I301
GCA_009626775.1	1	1	1	1	1	1	1	1	0	GCA_009626775.1	Bordetella	parapertussis	strain=I288
GCA_009626795.1	1	1	1	1	1	1	1	1	0	GCA_009626795.1	Bordetella	parapertussis	strain=I267
GCA_009626835.1	1	1	1	1	1	1	1	1	0	GCA_009626835.1	Bordetella	parapertussis	strain=I143
GCA_009626855.1	1	1	1	1	1	1	1	1	0	GCA_009626855.1	Bordetella	parapertussis	strain=I139
GCA_009626875.1	1	1	1	1	1	1	1	1	0	GCA_009626875.1	Bordetella	parapertussis	strain=I133
GCA_009627235.1	1	1	1	1	1	1	1	1	0	GCA_009627235.1	Bordetella	parapertussis	strain=H581
GCA_009627255.1	1	1	1	1	1	1	1	1	0	GCA_009627255.1	Bordetella	parapertussis	strain=H580
GCA_009627315.1	1	1	1	1	1	1	1	1	0	GCA_009627315.1	Bordetella	parapertussis	strain=H555
GCA_009627335.1	1	1	1	1	1	1	1	1	0	GCA_009627335.1	Bordetella	parapertussis	strain=H554
GCA_009627555.1	1	1	1	1	1	1	1	1	0	GCA_009627555.1	Bordetella	parapertussis	strain=H314
GCA_009627635.1	1	1	1	1	1	1	1	1	0	GCA_009627635.1	Bordetella	parapertussis	strain=H242
GCA_009627675.1	1	1	1	1	1	1	1	1	0	GCA_009627675.1	Bordetella	parapertussis	strain=H105
GCA_009627695.1	1	1	1	1	1	1	1	1	0	GCA_009627695.1	Bordetella	parapertussis	strain=H104
GCA_009627715.1	1	1	1	1	1	1	1	1	0	GCA_009627715.1	Bordetella	parapertussis	strain=H102
GCA_009627735.1	1	1	1	1	1	1	1	1	0	GCA_009627735.1	Bordetella	parapertussis	strain=H101
GCA_009627755.1	1	1	1	1	1	1	1	1	0	GCA_009627755.1	Bordetella	parapertussis	strain=H100
GCA_012974185.1	1	1	1	1	1	1	1	1	0	GCA_012974185.1	Bordetella	parapertussis	strain=J778
GCA_012974225.1	1	1	1	1	1	1	1	1	0	GCA_012974225.1	Bordetella	parapertussis	strain=J677
GCA_016804265.1	1	1	1	1	1	1	1	1	0	GCA_016804265.1	Bordetella	parapertussis	strain=J216
GCA_017357185.1	1	1	1	1	1	1	1	1	0	GCA_017357185.1	Bordetella	parapertussis	strain=CIDM-BPP2
GCA_900475845.1	1	1	1	1	1	1	1	1	0	GCA_900475845.1	Bordetella	parapertussis	strain=NCTC10520
GCA_900636935.1	1	1	1	1	1	1	1	1	0	GCA_900636935.1	Bordetella	parapertussis	strain=NCTC10524
GCA_901482575.1	1	1	1	1	1	1	1	1	0	GCA_901482575.1	Bordetella	parapertussis	strain=NCTC10522
GCA_001013565.1	1	1	1	1	1	1	1	1	0	GCA_001013565.1	Bordetella	pertussis	strain=D420
GCA_001307525.1	1	0	1	1	1	1	1	1	0	GCA_001307525.1	Bordetella	pertussis	strain=B3629
GCA_001307565.1	1	0	1	1	1	1	1	1	0	GCA_001307565.1	Bordetella	pertussis	strain=B3621
GCA_001307585.1	1	0	1	1	1	1	1	1	0	GCA_001307585.1	Bordetella	pertussis	strain=B1838
GCA_001307605.1	1	0	1	1	1	1	1	1	0	GCA_001307605.1	Bordetella	pertussis	strain=B1865
GCA_001307625.1	1	0	1	1	1	1	1	1	0	GCA_001307625.1	Bordetella	pertussis	strain=B3405
GCA_001307645.1	1	0	1	1	1	1	1	1	0	GCA_001307645.1	Bordetella	pertussis	strain=B3582
GCA_001307665.1	1	0	1	1	1	1	1	1	0	GCA_001307665.1	Bordetella	pertussis	strain=B3585
GCA_001307685.1	1	0	1	1	1	1	1	1	0	GCA_001307685.1	Bordetella	pertussis	strain=B3640
GCA_001307705.1	1	0	1	1	1	1	1	1	0	GCA_001307705.1	Bordetella	pertussis	strain=B3658
GCA_001307725.1	1	0	1	1	1	1	1	1	0	GCA_001307725.1	Bordetella	pertussis	strain=B3913
GCA_001307745.1	1	0	1	1	1	1	1	1	0	GCA_001307745.1	Bordetella	pertussis	strain=B3921
GCA_001509895.1	1	0	1	1	1	1	1	1	0	GCA_001509895.1	Bordetella	pertussis	strain=H321
GCA_001509915.1	1	0	1	1	1	1	1	1	0	GCA_001509915.1	Bordetella	pertussis	strain=I979
GCA_001558395.2	1	0	1	1	1	1	1	1	0	GCA_001558395.2	Bordetella	pertussis	strain=FDAARGOS_179
GCA_001605035.1	1	0	1	1	1	1	1	1	0	GCA_001605035.1	Bordetella	pertussis	strain=H374
GCA_001605055.1	1	0	1	1	1	1	1	1	0	GCA_001605055.1	Bordetella	pertussis	strain=H378
GCA_001605075.1	1	0	1	1	1	1	1	1	0	GCA_001605075.1	Bordetella	pertussis	strain=H379
GCA_001605095.1	1	0	1	1	1	1	1	1	0	GCA_001605095.1	Bordetella	pertussis	strain=H380
GCA_001605115.1	1	0	1	1	1	1	1	1	0	GCA_001605115.1	Bordetella	pertussis	strain=H559
GCA_001605135.1	1	0	1	1	1	1	1	1	0	GCA_001605135.1	Bordetella	pertussis	strain=H375
GCA_001605155.1	1	0	1	1	1	1	1	1	0	GCA_001605155.1	Bordetella	pertussis	strain=H627
GCA_001605175.1	1	0	1	1	1	1	1	1	0	GCA_001605175.1	Bordetella	pertussis	strain=H489
GCA_001605195.1	1	0	1	1	1	1	1	1	0	GCA_001605195.1	Bordetella	pertussis	strain=H542
GCA_001605215.1	1	0	1	1	1	1	1	1	0	GCA_001605215.1	Bordetella	pertussis	strain=H561
GCA_001605235.1	1	0	1	1	1	1	1	1	0	GCA_001605235.1	Bordetella	pertussis	strain=H563
GCA_001605255.1	1	0	1	1	1	1	1	1	0	GCA_001605255.1	Bordetella	pertussis	strain=H622
GCA_001605275.1	1	0	1	1	1	1	1	1	0	GCA_001605275.1	Bordetella	pertussis	strain=C393
GCA_001605295.1	1	1	1	1	1	1	1	1	0	GCA_001605295.1	Bordetella	pertussis	strain=E476
GCA_001605345.1	1	0	1	1	1	1	1	1	0	GCA_001605345.1	Bordetella	pertussis	strain=H564
GCA_001605365.1	1	0	1	1	1	1	1	1	0	GCA_001605365.1	Bordetella	pertussis	strain=H788
GCA_001605385.1	1	0	1	1	1	1	1	1	0	GCA_001605385.1	Bordetella	pertussis	strain=I468
GCA_001605405.1	1	0	1	1	1	1	1	1	0	GCA_001605405.1	Bordetella	pertussis	strain=I469
GCA_001605425.1	1	0	1	1	1	1	1	1	0	GCA_001605425.1	Bordetella	pertussis	strain=I472
GCA_001605445.1	1	0	1	1	1	1	1	1	0	GCA_001605445.1	Bordetella	pertussis	strain=I476
GCA_001605465.1	1	0	1	1	1	1	1	1	0	GCA_001605465.1	Bordetella	pertussis	strain=I480
GCA_001605485.1	1	0	1	1	1	1	1	1	0	GCA_001605485.1	Bordetella	pertussis	strain=I483
GCA_001605505.1	1	0	1	1	1	1	1	1	0	GCA_001605505.1	Bordetella	pertussis	strain=I496
GCA_001605525.1	1	0	1	1	1	1	1	1	0	GCA_001605525.1	Bordetella	pertussis	strain=I498
GCA_001605545.1	1	0	1	1	1	1	1	1	0	GCA_001605545.1	Bordetella	pertussis	strain=I518
GCA_001605565.1	1	0	1	1	1	1	1	1	0	GCA_001605565.1	Bordetella	pertussis	strain=I521
GCA_001605585.1	1	0	1	1	1	1	1	1	0	GCA_001605585.1	Bordetella	pertussis	strain=I538
GCA_001605605.1	1	0	1	1	1	1	1	1	0	GCA_001605605.1	Bordetella	pertussis	strain=I539
GCA_001605625.1	1	0	1	1	1	1	1	1	0	GCA_001605625.1	Bordetella	pertussis	strain=I646
GCA_001605645.1	1	0	1	1	1	1	1	1	0	GCA_001605645.1	Bordetella	pertussis	strain=I656
GCA_001605665.1	1	0	1	1	1	1	1	1	0	GCA_001605665.1	Bordetella	pertussis	strain=I669
GCA_001605685.1	1	0	1	1	1	1	1	1	0	GCA_001605685.1	Bordetella	pertussis	strain=I707
GCA_001628735.1	1	0	1	1	1	1	1	1	0	GCA_001628735.1	Bordetella	pertussis	strain=I344
GCA_001686365.1	1	0	1	1	1	1	1	1	0	GCA_001686365.1	Bordetella	pertussis	strain=VA-190
GCA_001686405.1	1	0	1	1	1	1	1	1	0	GCA_001686405.1	Bordetella	pertussis	strain=VA-194
GCA_001686425.1	1	0	1	1	1	1	1	1	0	GCA_001686425.1	Bordetella	pertussis	strain=VA-175
GCA_001686445.1	1	0	1	1	1	1	1	1	0	GCA_001686445.1	Bordetella	pertussis	strain=VA-150
GCA_001686465.1	1	0	1	1	1	1	1	1	0	GCA_001686465.1	Bordetella	pertussis	strain=VA-52
GCA_001686485.1	1	0	1	1	1	1	1	1	0	GCA_001686485.1	Bordetella	pertussis	strain=VA-198
GCA_001686505.1	1	0	1	1	1	1	1	1	0	GCA_001686505.1	Bordetella	pertussis	strain=VA-09
GCA_001686525.1	1	0	1	1	1	1	1	1	0	GCA_001686525.1	Bordetella	pertussis	strain=VA-15
GCA_001686545.1	1	0	1	1	1	1	1	1	0	GCA_001686545.1	Bordetella	pertussis	strain=VA-18
GCA_001686565.1	1	0	1	1	1	1	1	1	0	GCA_001686565.1	Bordetella	pertussis	strain=VA-62
GCA_001686585.1	1	0	1	1	1	1	1	1	0	GCA_001686585.1	Bordetella	pertussis	strain=VA-145
GCA_001686605.1	1	0	1	1	1	1	1	1	0	GCA_001686605.1	Bordetella	pertussis	strain=VA-010
GCA_001686625.1	1	0	1	1	1	1	1	1	0	GCA_001686625.1	Bordetella	pertussis	strain=UT25Sm1
GCA_001687385.1	1	1	1	1	1	1	1	1	0	GCA_001687385.1	Bordetella	pertussis	strain=B203
GCA_001687405.1	1	1	1	1	1	1	1	1	0	GCA_001687405.1	Bordetella	pertussis	strain=B202
GCA_001831395.1	1	1	1	1	1	1	1	1	0	GCA_001831395.1	Bordetella	pertussis	strain=J445
GCA_001831415.1	1	0	1	1	1	1	1	1	0	GCA_001831415.1	Bordetella	pertussis	strain=J446
GCA_001831435.1	1	0	1	1	1	1	1	1	0	GCA_001831435.1	Bordetella	pertussis	strain=J447
GCA_001831455.1	1	0	1	1	1	1	1	1	0	GCA_001831455.1	Bordetella	pertussis	strain=J448
GCA_001984925.1	1	0	1	1	1	1	1	1	0	GCA_001984925.1	Bordetella	pertussis	strain=C571
GCA_001984945.1	1	0	1	1	1	1	1	1	0	GCA_001984945.1	Bordetella	pertussis	strain=C958
GCA_001984965.1	1	0	1	1	1	1	1	1	0	GCA_001984965.1	Bordetella	pertussis	strain=D521
GCA_001984985.1	1	0	1	1	1	1	1	1	0	GCA_001984985.1	Bordetella	pertussis	strain=D879
GCA_001985005.1	1	0	1	1	1	1	1	1	0	GCA_001985005.1	Bordetella	pertussis	strain=E150
GCA_001985025.1	1	0	1	1	1	1	1	1	0	GCA_001985025.1	Bordetella	pertussis	strain=E555
GCA_001985045.1	1	0	1	1	1	1	1	1	0	GCA_001985045.1	Bordetella	pertussis	strain=E587
GCA_001985065.1	1	0	1	1	1	1	1	1	0	GCA_001985065.1	Bordetella	pertussis	strain=E809
GCA_001985085.1	1	0	1	1	1	1	1	1	0	GCA_001985085.1	Bordetella	pertussis	strain=E976
GCA_001985105.1	1	0	1	1	1	1	1	1	0	GCA_001985105.1	Bordetella	pertussis	strain=F011
GCA_001985125.1	1	0	1	1	1	1	1	1	0	GCA_001985125.1	Bordetella	pertussis	strain=F034
GCA_001985145.1	1	0	1	1	1	1	1	1	0	GCA_001985145.1	Bordetella	pertussis	strain=F658
GCA_001985165.1	1	0	1	1	1	1	1	1	0	GCA_001985165.1	Bordetella	pertussis	strain=F670
GCA_001985205.1	1	0	1	1	1	1	1	1	0	GCA_001985205.1	Bordetella	pertussis	strain=F687
GCA_001985225.1	1	0	1	1	1	1	1	1	0	GCA_001985225.1	Bordetella	pertussis	strain=F948
GCA_001985245.1	1	0	1	1	1	1	1	1	0	GCA_001985245.1	Bordetella	pertussis	strain=H520
GCA_001985265.1	1	0	1	1	1	1	1	1	0	GCA_001985265.1	Bordetella	pertussis	strain=H579
GCA_001985285.1	1	0	1	1	1	1	1	1	0	GCA_001985285.1	Bordetella	pertussis	strain=H637
GCA_001985305.1	1	0	1	1	1	1	1	1	0	GCA_001985305.1	Bordetella	pertussis	strain=H665
GCA_001985325.1	1	0	1	1	1	1	1	1	0	GCA_001985325.1	Bordetella	pertussis	strain=H703
GCA_001985345.1	1	0	1	1	1	1	1	1	0	GCA_001985345.1	Bordetella	pertussis	strain=H707
GCA_001985365.1	1	0	1	1	1	1	1	1	0	GCA_001985365.1	Bordetella	pertussis	strain=H729
GCA_001985385.1	1	0	1	1	1	1	1	1	0	GCA_001985385.1	Bordetella	pertussis	strain=H740
GCA_001985405.1	1	0	1	1	1	1	1	1	0	GCA_001985405.1	Bordetella	pertussis	strain=H754
GCA_001985425.1	1	0	1	1	1	1	1	1	0	GCA_001985425.1	Bordetella	pertussis	strain=H765
GCA_001985445.1	1	0	1	1	1	1	1	1	0	GCA_001985445.1	Bordetella	pertussis	strain=H784
GCA_001985465.1	1	0	1	1	1	1	1	1	0	GCA_001985465.1	Bordetella	pertussis	strain=H800
GCA_001985485.1	1	0	1	1	1	1	1	1	0	GCA_001985485.1	Bordetella	pertussis	strain=H806
GCA_001985505.1	1	0	1	1	1	1	1	1	0	GCA_001985505.1	Bordetella	pertussis	strain=H810
GCA_001985525.1	1	0	1	1	1	1	1	1	0	GCA_001985525.1	Bordetella	pertussis	strain=H812
GCA_001985545.1	1	0	1	1	1	1	1	1	0	GCA_001985545.1	Bordetella	pertussis	strain=I228
GCA_001985565.1	1	0	1	1	1	1	1	1	0	GCA_001985565.1	Bordetella	pertussis	strain=I238
GCA_001985585.1	1	0	1	1	1	1	1	1	0	GCA_001985585.1	Bordetella	pertussis	strain=I373
GCA_001985605.1	1	0	1	1	1	1	1	1	0	GCA_001985605.1	Bordetella	pertussis	strain=I387
GCA_001985625.1	1	0	1	1	1	1	1	1	0	GCA_001985625.1	Bordetella	pertussis	strain=I602
GCA_001985645.1	1	0	1	1	1	1	1	1	0	GCA_001985645.1	Bordetella	pertussis	strain=I730
GCA_001985665.1	1	0	1	1	1	1	1	1	0	GCA_001985665.1	Bordetella	pertussis	strain=I752
GCA_001985685.1	1	0	1	1	1	1	1	1	0	GCA_001985685.1	Bordetella	pertussis	strain=I763
GCA_001985705.1	1	0	1	1	1	1	1	1	0	GCA_001985705.1	Bordetella	pertussis	strain=I915
GCA_001985725.1	1	0	1	1	1	1	1	1	0	GCA_001985725.1	Bordetella	pertussis	strain=I944
GCA_001985745.1	1	0	1	1	1	1	1	1	0	GCA_001985745.1	Bordetella	pertussis	strain=J018
GCA_001985765.1	1	0	1	1	1	1	1	1	0	GCA_001985765.1	Bordetella	pertussis	strain=H681
GCA_001985785.1	1	0	1	1	1	1	1	1	0	GCA_001985785.1	Bordetella	pertussis	strain=H852
GCA_001985805.1	1	0	1	1	1	1	1	1	0	GCA_001985805.1	Bordetella	pertussis	strain=I106
GCA_001985825.1	1	0	1	1	1	1	1	1	0	GCA_001985825.1	Bordetella	pertussis	strain=I351
GCA_001985845.1	1	0	1	1	1	1	1	1	0	GCA_001985845.1	Bordetella	pertussis	strain=I743
GCA_001985865.1	1	0	1	1	1	1	1	1	0	GCA_001985865.1	Bordetella	pertussis	strain=I751
GCA_001985885.1	1	0	1	1	1	1	1	1	0	GCA_001985885.1	Bordetella	pertussis	strain=I976
GCA_001985905.1	1	0	1	1	1	1	1	1	0	GCA_001985905.1	Bordetella	pertussis	strain=J010
GCA_001985925.1	1	0	1	1	1	1	1	1	0	GCA_001985925.1	Bordetella	pertussis	strain=J013
GCA_001985945.1	1	0	1	1	1	1	1	1	0	GCA_001985945.1	Bordetella	pertussis	strain=J038
GCA_001985965.1	1	0	1	1	1	1	1	1	0	GCA_001985965.1	Bordetella	pertussis	strain=J107
GCA_001985985.1	1	1	1	1	1	1	1	1	0	GCA_001985985.1	Bordetella	pertussis	strain=J169
GCA_001986005.1	1	0	1	1	1	1	1	1	0	GCA_001986005.1	Bordetella	pertussis	strain=G057
GCA_001986025.1	1	0	1	1	1	1	1	1	0	GCA_001986025.1	Bordetella	pertussis	strain=H639
GCA_001986045.1	1	0	1	1	1	1	1	1	0	GCA_001986045.1	Bordetella	pertussis	strain=I150
GCA_001986065.1	1	0	1	1	1	1	1	1	0	GCA_001986065.1	Bordetella	pertussis	strain=I187
GCA_001986085.1	1	0	1	1	1	1	1	1	0	GCA_001986085.1	Bordetella	pertussis	strain=I259
GCA_001986105.1	1	0	1	1	1	1	1	1	0	GCA_001986105.1	Bordetella	pertussis	strain=I464
GCA_001986155.1	1	0	1	1	1	1	1	1	0	GCA_001986155.1	Bordetella	pertussis	strain=H320
GCA_001986175.1	1	0	1	1	1	1	1	1	0	GCA_001986175.1	Bordetella	pertussis	strain=H834
GCA_001986195.1	1	0	1	1	1	1	1	1	0	GCA_001986195.1	Bordetella	pertussis	strain=H710
GCA_001986215.1	1	0	1	1	1	1	1	1	0	GCA_001986215.1	Bordetella	pertussis	strain=H851
GCA_001986235.1	1	0	1	1	1	1	1	1	0	GCA_001986235.1	Bordetella	pertussis	strain=H911
GCA_001986255.1	1	0	1	1	1	1	1	1	0	GCA_001986255.1	Bordetella	pertussis	strain=H915
GCA_001986275.1	1	0	1	1	1	1	1	1	0	GCA_001986275.1	Bordetella	pertussis	strain=I075
GCA_001986295.1	1	0	1	1	1	1	1	1	0	GCA_001986295.1	Bordetella	pertussis	strain=I112
GCA_001986315.1	1	0	1	1	1	1	1	1	0	GCA_001986315.1	Bordetella	pertussis	strain=I975
GCA_001986335.1	1	0	1	1	1	1	1	1	0	GCA_001986335.1	Bordetella	pertussis	strain=I998
GCA_001986355.1	1	0	1	1	1	1	1	1	0	GCA_001986355.1	Bordetella	pertussis	strain=J022
GCA_001986375.1	1	0	1	1	1	1	1	1	0	GCA_001986375.1	Bordetella	pertussis	strain=C505
GCA_001986415.1	1	0	1	1	1	1	1	1	0	GCA_001986415.1	Bordetella	pertussis	strain=C742
GCA_001986435.1	1	0	1	1	1	1	1	1	0	GCA_001986435.1	Bordetella	pertussis	strain=D175
GCA_001986455.1	1	0	1	1	1	1	1	1	0	GCA_001986455.1	Bordetella	pertussis	strain=D321
GCA_001986475.1	1	0	1	1	1	1	1	1	0	GCA_001986475.1	Bordetella	pertussis	strain=D502
GCA_001986495.1	1	0	1	1	1	1	1	1	0	GCA_001986495.1	Bordetella	pertussis	strain=E024
GCA_001986515.1	1	0	1	1	1	1	1	1	0	GCA_001986515.1	Bordetella	pertussis	strain=E530
GCA_001986535.1	1	0	1	1	1	1	1	1	0	GCA_001986535.1	Bordetella	pertussis	strain=H346
GCA_001986555.1	1	0	1	1	1	1	1	1	0	GCA_001986555.1	Bordetella	pertussis	strain=H437
GCA_001986575.1	1	0	1	1	1	1	1	1	0	GCA_001986575.1	Bordetella	pertussis	strain=H762
GCA_001986595.1	1	0	1	1	1	1	1	1	0	GCA_001986595.1	Bordetella	pertussis	strain=H763
GCA_001986615.1	1	0	1	1	1	1	1	1	0	GCA_001986615.1	Bordetella	pertussis	strain=H764
GCA_001986635.1	1	0	1	1	1	1	1	1	0	GCA_001986635.1	Bordetella	pertussis	strain=H766
GCA_001986655.1	1	0	1	1	1	1	1	1	0	GCA_001986655.1	Bordetella	pertussis	strain=H768
GCA_001986675.1	1	0	1	1	1	1	1	1	0	GCA_001986675.1	Bordetella	pertussis	strain=H773
GCA_001986695.1	1	0	1	1	1	1	1	1	0	GCA_001986695.1	Bordetella	pertussis	strain=H775
GCA_001986715.1	1	0	1	1	1	1	1	1	0	GCA_001986715.1	Bordetella	pertussis	strain=H779
GCA_001986735.1	1	0	1	1	1	1	1	1	0	GCA_001986735.1	Bordetella	pertussis	strain=H787
GCA_001986755.1	1	0	1	1	1	1	1	1	0	GCA_001986755.1	Bordetella	pertussis	strain=H842
GCA_001986775.1	1	0	1	1	1	1	1	1	0	GCA_001986775.1	Bordetella	pertussis	strain=H847
[truncated: 22,759 more rows]
